# Supplementary material for: Electrochemical oxidative site-selective direct C–H activation of tanshinone IIA
Source: Royal Society of Chemistry journal article supplement (doi:10.1039/d4ob01479k), 2024-01-01

# Supporting Information

## Electrochemical Oxidative Site-selective Direct C–H Activation of Tanshinone IIA

Jingyi Zhang,<sup>†a</sup> Shan Han,<sup>†a</sup> Siao Lu,<sup>a</sup> Minghan Li,<sup>a</sup> Linyu Zheng,<sup>a</sup> Zixun Gao,<sup>a</sup> Yulin Feng,<sup>\*a</sup>  
Fangling Lu<sup>\*a</sup>

<sup>a</sup>The National Pharmaceutical Engineering Center for Solid Preparation in Chinese Herbal Medicine,  
Jiangxi University of Chinese Medicine, 56 Yangming Road, Jiangxi, Nanchang 330006, P. R.  
China.

<sup>†</sup>Jingyi Zhang and Shan Han contributed equally to this work.

## Table of Contents

|                                                                                            |     |
|--------------------------------------------------------------------------------------------|-----|
| General information.....                                                                   | S3  |
| Experimental procedure.....                                                                | S4  |
| Mechanism research.....                                                                    | S7  |
| Detail descriptions for products.....                                                      | S9  |
| References.....                                                                            | S20 |
| Copies of $^1\text{H}$ NMR, $^{13}\text{C}$ NMR, $^{19}\text{F}$ NMR and HRMS spectra..... | S21 |

## General information

Unless otherwise noted, materials were obtained from commercial suppliers and used without further purification. The instrument for electrolysis was dual display potentiostat (DJS-292B) (made in China). The anodic electrode was graphite rod ( $\phi$  6 mm) and cathodic electrode was platinum plate (15 mm $\times$ 15 mm $\times$ 0.3 mm). Thin layer chromatography (TLC) employed glass 0.25 mm silica gel plates. Flash chromatography columns were packed with 200-300 mesh silica gel in petroleum (boiling point was between 60-90 °C). Gradient flash chromatography was conducted eluting with a continuous gradient from petroleum to the indicated solvent, and they were listed as volume/volume ratios. NMR spectra were recorded on a Bruker spectrometer at 400 MHz ( $^1\text{H}$  NMR), 101 MHz ( $^{13}\text{C}$  NMR), 376 MHz ( $^{19}\text{F}$  NMR). Chemical shifts were reported relative to tetramethylsilane, chloroform-D (7.26 ppm for  $^1\text{H}$ , 77.16 ppm for  $^{13}\text{C}$ ), respectively. And all  $^1\text{H}$ ,  $^{13}\text{C}$  and  $^{19}\text{F}$  NMR data spectra were reported in delta ( $\delta$ ) units, parts per million (ppm) downfield from the internal standard. Coupling constants were reported in Hertz (Hz). LC-MS spectra were recorded on AB SCIEX Triple TOF 5600<sup>+</sup>.

## Experimental procedure

### General procedure for the preparation of 2a-2y:

In an oven-dried undivided three-necked bottle (25 mL) equipped with a stir bar, Tanshinone IIA (0.3 mmol, 88.3 mg), diselenides **1** (0.3 mmol),  $n\text{-Bu}_4\text{NBF}_4$  (0.3 mmol, 98.9 mg), MeCN (7 mL) was added. The bottle was equipped with graphite rod ( $\phi$  6 mm, about 15 mm immersion depth in solution) as the anode and platinum plate (15 mm $\times$ 15 mm $\times$ 0.3 mm) as the cathode. The reaction mixture was stirred and electrolyzed at a constant current of 25 mA under Ar atmosphere at room temperature for 8 h. After completion of the reaction, as indicated by TLC and LC-MS, the crude mixture product was obtained by flash column chromatography on silica gel (petroleum ether: ethyl acetate = 100: 1).

When we use diphenyl disulfide as the substrate, we slightly reduced the current to 15 mA to mitigate the risk of electrochemical degradation in the reaction system.

### General procedure for the preparation of 2z-2za:

In an oven-dried undivided three-necked bottle (25 mL) equipped with a stir bar, Tanshinone IIA (0.3 mmol, 88.3 mg), KCl or KBr (3.0 mmol), MeCN/H<sub>2</sub>O (6/1 mL) was added. The bottle was equipped with graphite rod ( $\phi$  6 mm, about 15 mm immersion depth in solution) as the anode and platinum plate (15 mm $\times$ 15 mm $\times$ 0.3 mm) as the cathode. The reaction mixture was stirred and electrolyzed at a constant current of 15 mA under Ar atmosphere at room temperature for 10 h. After completion of the reaction, as indicated by TLC and LC-MS, the crude mixture product was obtained by flash column chromatography on silica gel (petroleum ether: ethyl acetate = 300: 1).

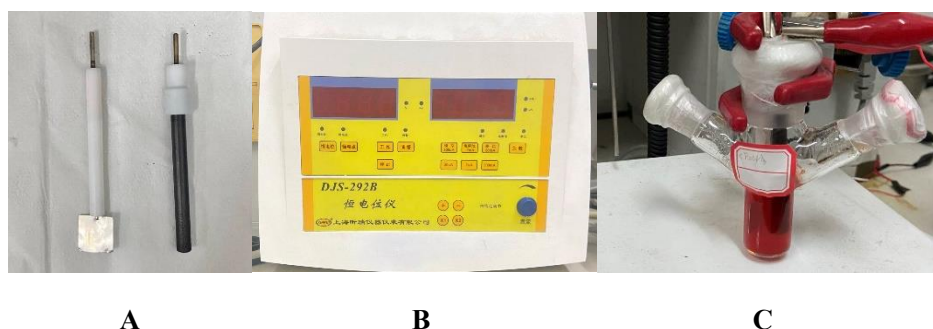

Figure S1. The experimental setup for electrolysis. (A, B, C: The electrochemical reaction apparatus used.)

### Procedure for gram scale synthesis of 2a:

In an oven-dried undivided beaker (100 mL) equipped with a stir bar, Tanshinone IIA (5.0 mmol, 1471.7 mg), 1,2-diphenyldislane **1a** (5.0 mmol, 1560.7 mg),  $n\text{Bu}_4\text{NBF}_4$  (5.0 mmol, 1646.0 mg), MeCN (130 mL) was added. The bottle was equipped with graphite rod ( $\phi$  6 mm, about 15 mm immersion depth in solution) as the anode and platinum plate (15 mm $\times$ 15 mm $\times$ 0.3 mm) as the cathode. The reaction mixture was stirred and electrolyzed at a constant current of 25 mA under Ar atmosphere at room temperature for 96 h, after completion of the reaction, as indicated by TLC and LC-MS. The pure product **2a** (yield 72%, red solid, 1.62 g) was obtained by flash column chromatography on silica gel (petroleum ether: ethyl acetate = 100:1).

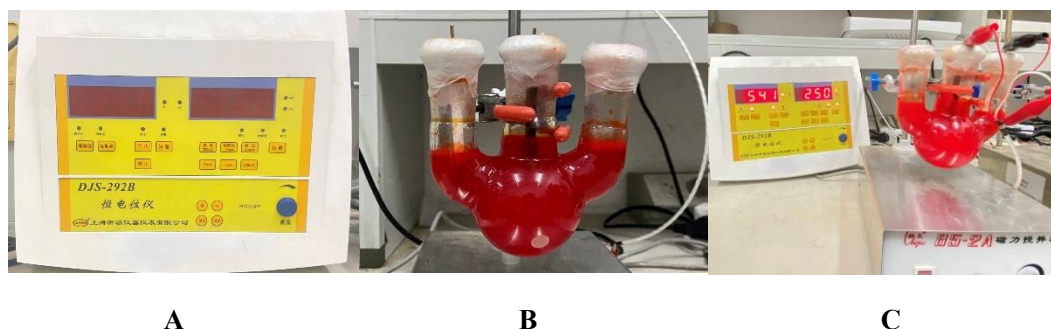

Figure S2. The experimental setup for electrolysis. (A, B, C: The electrochemical reaction apparatus used.)

### General procedure for the preparation of **1**:<sup>1</sup>

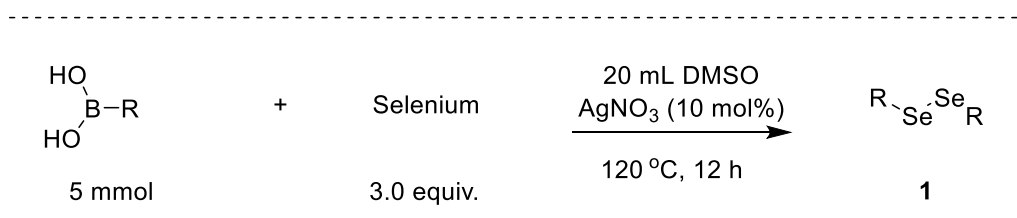

In a 25 mL schlenk flask was charged with substituted aryl boronic acid (5 mmol, 1.0 equiv.), selenium (15 mmol, 3.0 equiv.) and  $\text{AgNO}_3$  (10 mol%), then 20 mL of dimethyl sulfoxide was added. Stir the reaction mixture at 120 °C for 12 hours. After completion of the reaction, as indicated by TLC. The contents cooled, dilute the reaction mixture with  $\text{H}_2\text{O}$  (20 mL), the resulting mixture was extracted with EtOAc (3 $\times$ 20 mL). Wash the combined organic phase with water and brine (30 mL). Dry over anhydrous  $\text{Na}_2\text{SO}_4$ . After remove the solvent under reduced pressure, the residue was purified by silica-gel column chromatography to give the products **1** (petroleum ether: ethyl acetate = 1000:1).

### Procedure of antitumor activity of tanshinone derivatives:<sup>2</sup>

A549 Cells ( $5 \times 10^3$  cells/well) cultured in 96-well plates were treated with Tanshinone IIA and derivatives (10  $\mu$ M) for 24 h. After adding 100  $\mu$ L of CCK-8 mixture and culturing for another 1 h and the absorbance at 450 nm was detected using a multilabel microplate reader (Vermont, Bio Tek, USA). We found that compounds **2k**, **2q**, and **2w** showed better effects than Tanshinone IIA at a concentration of 10  $\mu$ M.

**Table 1** Viability of IIA, **2a-2za** and **3a** on A549 cells at a concentration of 10  $\mu$ M.

| Compound  | Viability | Compound              | Viability |
|-----------|-----------|-----------------------|-----------|
| <b>2a</b> | 6%        | <b>2p</b>             | 11%       |
| <b>2b</b> | 9%        | <b>2q</b>             | 51%       |
| <b>2c</b> | 12%       | <b>2r</b>             | 3%        |
| <b>2d</b> | 13%       | <b>2s</b>             | 0%        |
| <b>2e</b> | 0%        | <b>2t</b>             | 0%        |
| <b>2f</b> | 12%       | <b>2u</b>             | 30%       |
| <b>2g</b> | 3%        | <b>2v</b>             | 6%        |
| <b>2h</b> | 0%        | <b>2w</b>             | 65%       |
| <b>2i</b> | 0%        | <b>2x</b>             | 30%       |
| <b>2j</b> | 17%       | <b>2y</b>             | 27%       |
| <b>2k</b> | 41%       | <b>2z</b>             | 18%       |
| <b>2l</b> | 5%        | <b>2za</b>            | 18%       |
| <b>2m</b> | 0%        | <b>3a</b>             | 16%       |
| <b>2n</b> | 27%       | <b>Tanshinone IIA</b> | 31%       |
| <b>2o</b> | 9%        |                       |           |

To further ascertain the antitumor activity of compounds **2k**, **2q**, and **2w**, we assessed the impact of varying concentrations on A549 cells. The findings revealed that compounds **2k** ( $IC_{50}$ =19.39  $\mu$ M), **2q** ( $IC_{50}$ =13.55  $\mu$ M), and **2w** ( $IC_{50}$ =6.03  $\mu$ M) notably suppressed the proliferation of A549 cancer cells in a dose-dependent and time-dependent manner. These compounds exhibited enhanced antitumor activity relative to the parent compound, Tanshinone IIA ( $IC_{50}$ =24.57  $\mu$ M).

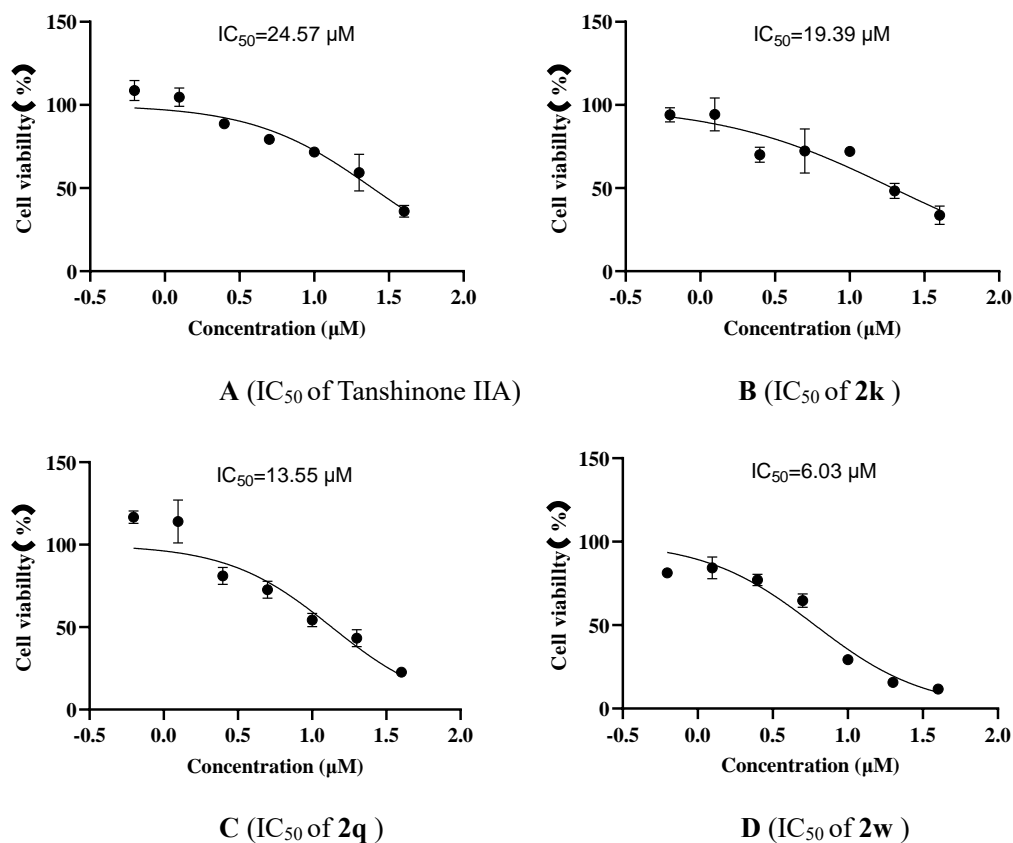

Figure S3. Cells were treated with different concentrations of tanshinone IIA, 2k, 2q 2w for 24 h, then assayed by CCK-8 method.

## Mechanism research

In order to investigate the possible mechanism of this transformation, a series of control experiments were carried out. When stoichiometric amounts of radical scavengers, such as 2,2,6,6-tetramethylpiperidine-1-oxyl (TEMPO) or butylated hydroxytoluene (BHT) were introduced into the reaction environment, the conversion was significantly reduced. The observation of adducts **4a** indicated that the reaction likely followed a radical mechanism, potentially involving selenium radicals in the transformation.

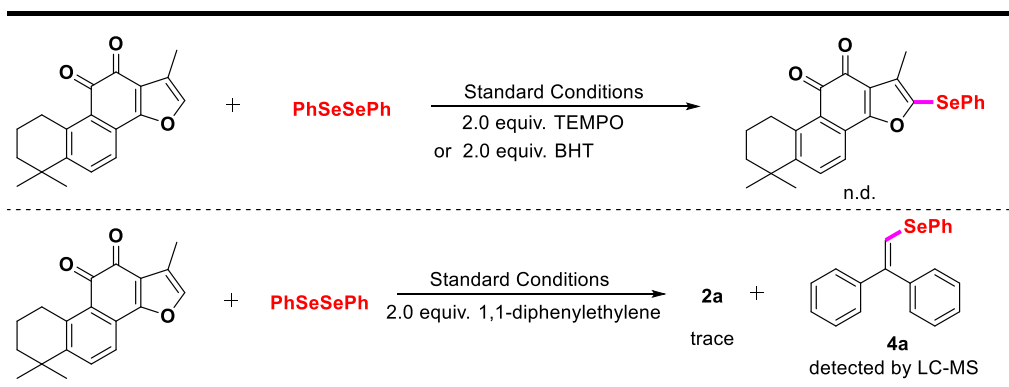

**Scheme 1.** Control experiments.

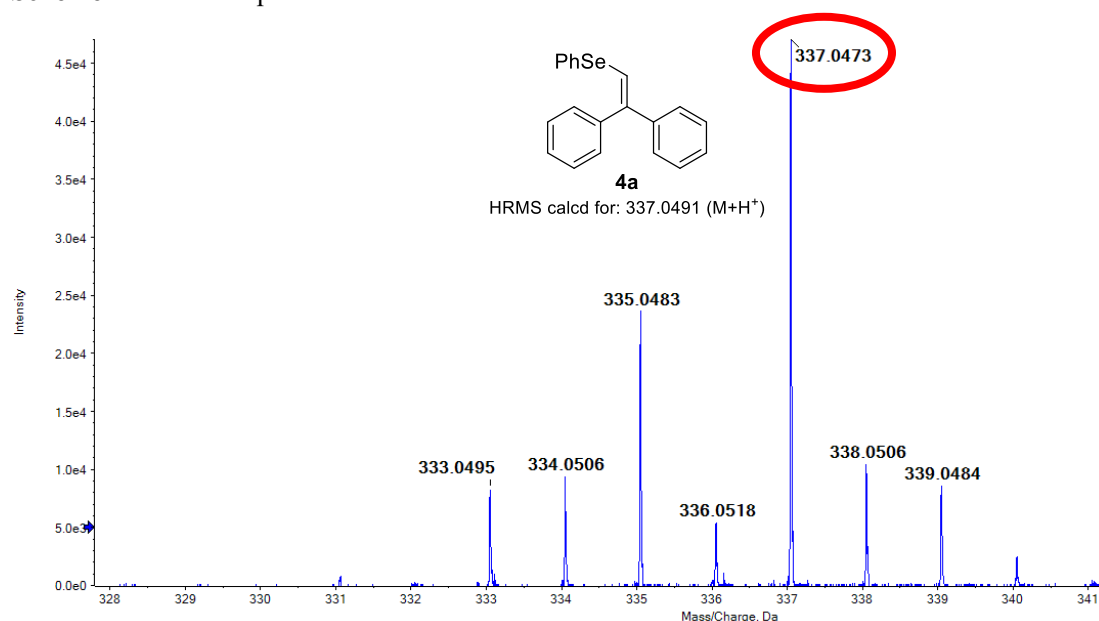

**Figure S4.** Free radical capture experiment (DPE-SePh)

### General procedure for cyclic voltammetry (CV):

Cyclic voltammetry was performed in a three-electrode cell connected to a schlenk line under air at room temperature. The working electrode was a glassy carbon electrode, the counter electrode a platinum wire. The reference was an Ag/AgCl electrode submerged in saturated aqueous KCl solution. 10 mL of CH<sub>3</sub>CN containing 0.01 M *n*Bu<sub>4</sub>NBF<sub>4</sub> were poured into the electrochemical cell in all experiments. The scan rate is 0.1 V/s, ranging from 0 V to 3.5 V. The peak potentials vs. Ag/AgCl for used. Distinct anodic peaks for Tanshinone IIA was observed at potentials of 2.29 V. Furthermore, the cyclic voltammetry curve of compound **1a** in acetonitrile displayed two oxidation peaks, located at 1.92 V and 2.82 V. These findings suggest that compound **1a** undergoes preferential oxidation at the anode within this electrochemical setup.



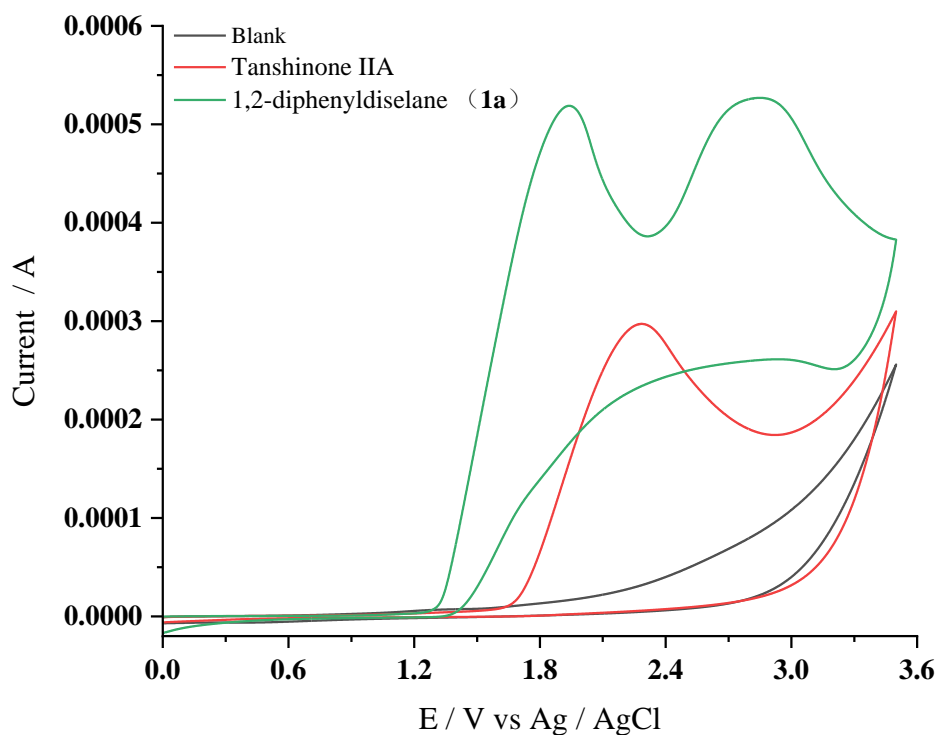

Figure S5 Cyclic voltammetry

## Detail descriptions for products

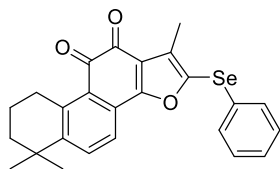

### 1,6,6-trimethyl-2-(phenylselanyl)-6,7,8,9-tetrahydrophenanthro[1,2-b]furan-10,11-dione (2a).

(Red solid was obtained in 92% isolated yield, 124.7 mg).  $^1\text{H}$  NMR (400 MHz,  $\text{CDCl}_3$ )  $\delta$  7.58 (q, 2H,  $J_1 = 8.0$  Hz,  $J_2 = 20.0$  Hz), 7.37-7.36 (m, 2H), 7.27-7.22 (m, 3H), 3.16 (t, 2H,  $J = 8.0$  Hz), 2.36 (s, 3H), 1.81-1.75 (m, 2H), 1.66-1.63 (m, 2H), 1.30 (s, 6H);  $^{13}\text{C}$  NMR (101 MHz,  $\text{CDCl}_3$ )  $\delta$  183.07, 175.04, 163.98, 150.81, 144.63, 140.93, 133.52, 130.50, 130.47, 130.26, 129.58, 127.41, 126.85, 126.66, 120.81, 120.52, 37.80, 34.74, 31.84, 29.95, 19.11, 10.91.

HRMS (ESI) calcd for  $\text{C}_{25}\text{H}_{22}\text{O}_3\text{Se}$ : 451.0809 ( $\text{M}+\text{H}^+$ ), found: 451.0811.

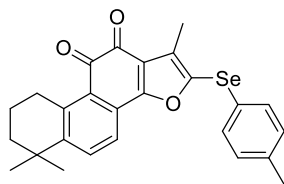

### 1,6,6-trimethyl-2-(p-tolylselanyl)-6,7,8,9-tetrahydrophenanthro[1,2-b]furan-10,11-dione (2b).

(Red solid was obtained in 59% isolated yield, 82.1 mg).  $^1\text{H}$  NMR (400 MHz,  $\text{CDCl}_3$ )  $\delta$  7.52 (q, 2H,  $J_1 = 8.0$  Hz,  $J_2 = 12.0$  Hz), 7.22 (d, 2H,  $J = 8.0$  Hz), 7.00 (d, 2H,  $J = 8.0$  Hz), 3.10 (t, 2H,  $J = 8.0$  Hz), 2.29 (s, 3H), 2.22 (s, 3H), 1.75-1.70 (m, 2H), 1.59-1.56 (m, 2H), 1.23 (s, 6H);  $^{13}\text{C}$  NMR (101 MHz,  $\text{CDCl}_3$ )  $\delta$  182.17, 174.11, 162.83, 149.69, 143.58, 140.42, 136.61, 132.47, 130.10, 129.31, 128.66, 125.90, 125.63, 125.45, 119.76, 119.49, 36.77, 33.69, 30.80, 28.91, 20.03, 18.07, 9.85.

HRMS (ESI) calcd for  $\text{C}_{26}\text{H}_{24}\text{O}_3\text{Se}$ : 465.0965 ( $\text{M}+\text{H}^+$ ), found: 465.0954.

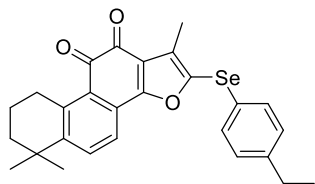

**2-((4-ethylphenyl)selanyl)-1,6,6-trimethyl-6,7,8,9-tetrahydrophenanthro[1,2-b]furan-10,11-dione (2c).** (Red solid was obtained in 33% isolated yield, 47.6 mg).  $^1\text{H}$  NMR (400 MHz,  $\text{CDCl}_3$ )  $\delta$  7.62 (q, 2H,  $J_1 = 8.0$  Hz,  $J_2 = 12.0$  Hz), 7.32 (d, 2H,  $J = 8.0$  Hz), 7.10 (d, 2H,  $J = 8.0$  Hz), 3.18 (t, 2H,  $J = 8.0$  Hz), 2.60 (q, 2H,  $J_1 = 8.0$  Hz,  $J_2 = 12.0$  Hz), 2.37 (s, 3H), 1.81-1.78 (m, 2H), 1.67-1.64 (m, 2H), 1.30 (s, 6H), 1.20 (t, 3H,  $J = 8.0$  Hz);  $^{13}\text{C}$  NMR (101 MHz,  $\text{CDCl}_3$ )  $\delta$  183.23, 175.16, 163.90, 150.73, 144.62, 143.97, 141.42, 133.51, 132.22, 131.12, 129.79, 129.19, 126.96, 126.77, 126.68, 120.82, 120.53, 37.81, 34.73, 31.84, 29.95, 28.45, 19.11, 15.45, 10.89.

HRMS (ESI) calcd for  $\text{C}_{27}\text{H}_{26}\text{O}_3\text{Se}$ : 501.0941 ( $\text{M}+\text{Na}^+$ ), found: 501.0934.

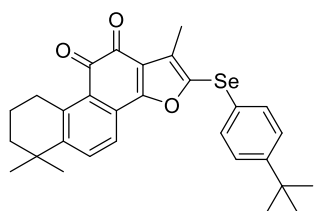

**2-((4-(tert-butyl)phenyl)selanyl)-1,6,6-trimethyl-6,7,8,9-tetrahydrophenanthro[1,2-b]furan-10,11-dione (2d).** (Red solid was obtained in 32% isolated yield, 47.8 mg).  $^1\text{H}$  NMR (400 MHz,  $\text{CDCl}_3$ )  $\delta$  7.63 (t, 2H,  $J = 8.0$  Hz), 7.31 (q, 4H,  $J_1 = 8.0$  Hz,  $J_2 = 16.0$  Hz), 3.18 (t, 2H,  $J = 8.0$  Hz), 2.38 (s, 3H), 1.82-1.76 (m, 2H), 1.67-1.65 (m, 2H), 1.31 (s, 6H), 1.28 (s, 9H);  $^{13}\text{C}$  NMR (101 MHz,  $\text{CDCl}_3$ )  $\delta$  183.25, 175.18, 163.93, 150.83, 150.74, 144.63, 141.29, 133.52, 130.65, 129.96, 128.86, 126.96, 126.74, 126.69, 120.83, 120.53, 37.81, 34.73, 34.57, 31.84, 31.21, 29.95, 19.11, 10.94.

HRMS (ESI) calcd for  $\text{C}_{29}\text{H}_{30}\text{O}_3\text{Se}$ : 529.1255 ( $\text{M}+\text{Na}^+$ ), found: 529.1267.

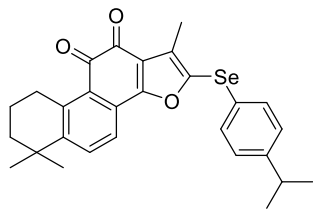

**2-((4-isopropylphenyl)selanyl)-1,6,6-trimethyl-6,7,8,9-tetrahydrophenanthro[1,2-b]furan-**

**10,11-dione (2e).** (Red solid was obtained in 54% isolated yield, 79.8 mg).  $^1\text{H}$  NMR (400 MHz,  $\text{CDCl}_3$ )  $\delta$  7.60 (q, 2H,  $J_1 = 8.0$  Hz,  $J_2 = 12.0$  Hz), 7.32 (d, 2H,  $J = 8.0$  Hz), 7.12 (d, 2H,  $J = 8.0$  Hz), 3.17 (t, 2H,  $J = 8.0$  Hz), 2.90-2.80 (m, 1H), 2.37 (s, 3H), 1.80-1.77 (m, 2H), 1.67-1.64 (m, 2H), 1.30 (s, 6H), 1.21 (s, 3H), 1.20 (s, 3H);  $^{13}\text{C}$  NMR (101 MHz,  $\text{CDCl}_3$ )  $\delta$  183.18, 175.11, 163.87, 150.73, 148.58, 144.61, 141.39, 133.51, 131.06, 129.85, 127.78, 126.93, 126.91, 126.66, 120.81, 120.53, 37.81, 34.73, 33.76, 31.84, 29.95, 23.87, 19.11, 10.93.

HRMS (ESI) calcd for  $\text{C}_{28}\text{H}_{28}\text{O}_3\text{Se}$ : 493.1278 ( $\text{M}+\text{H}^+$ ), found: 493.1275.

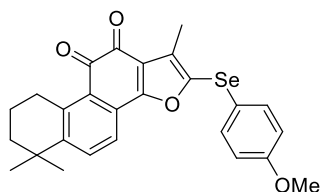

**2-((4-methoxyphenyl)selanyl)-1,6,6-trimethyl-6,7,8,9-tetrahydrophenanthro[1,2-b]furan-**

**10,11-dione (2f).** (Red solid was obtained in 32% isolated yield, 33.3 mg).  $^1\text{H}$  NMR (400 MHz,  $\text{CDCl}_3$ )  $\delta$  7.61 (q, 2H,  $J_1 = 8.0$  Hz,  $J_2 = 12.0$  Hz), 7.44-7.40 (m, 2H), 6.83-6.79 (m, 2H), 3.77 (s, 3H), 3.17 (t, 2H,  $J = 8.0$  Hz), 2.37 (s, 3H), 1.82-1.77 (m, 2H), 1.66-1.64 (m, 2H), 1.30 (s, 6H);  $^{13}\text{C}$  NMR (101 MHz,  $\text{CDCl}_3$ )  $\delta$  183.24, 175.17, 163.69, 159.65, 150.66, 144.61, 142.09, 133.78, 133.51, 128.94, 126.98, 126.64, 120.76, 120.52, 119.93, 115.21, 55.35, 37.80, 34.72, 31.85, 29.95, 19.10, 10.90.

HRMS (ESI) calcd for  $\text{C}_{26}\text{H}_{24}\text{O}_4\text{Se}$ : 481.0914 ( $\text{M}+\text{H}^+$ ), found: 481.0901.

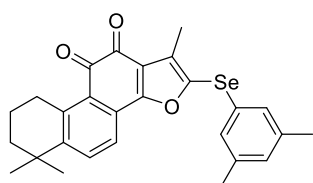

**2-((3,5-dimethylphenyl)selanyl)-1,6,6-trimethyl-6,7,8,9-tetrahydrophenanthro[1,2-b]furan-**

**10,11-dione (2g).** (Red solid was obtained in 33% isolated yield, 46.7 mg).  $^1\text{H}$  NMR (400 MHz,  $\text{CDCl}_3$ )  $\delta$  7.62 (q, 2H,  $J_1 = 8.0$  Hz,  $J_2 = 8.0$  Hz), 6.98 (s, 2H), 6.87 (s, 1H), 3.18 (t, 2H,  $J = 8.0$  Hz),

2.37 (s, 3H), 2.25 (s, 6H), 1.83-1.77 (m, 2H), 1.67-1.64 (m, 2H), 1.31 (s, 6H);  $^{13}\text{C}$  NMR (101 MHz,  $\text{CDCl}_3$ )  $\delta$  183.25, 175.20, 163.99, 150.74, 144.64, 141.15, 139.31, 133.54, 130.14, 129.90, 129.31, 128.09, 126.97, 126.69, 120.86, 120.55, 37.81, 34.74, 31.85, 29.98, 21.28, 19.11, 10.97.

HRMS (ESI) calcd for  $\text{C}_{27}\text{H}_{26}\text{O}_3\text{Se}$ : 479.1121 ( $\text{M}+\text{H}^+$ ), found: 479.1117.

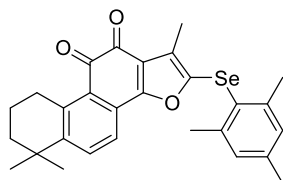

**2-((4-methoxyphenyl)selanyl)-1,6,6-trimethyl-6,7,8,9-tetrahydrophenanthro[1,2-b]furan-**

**10,11-dione (2h).** (Red solid was obtained in 41% isolated yield, 59.7 mg).  $^1\text{H}$  NMR (400 MHz,  $\text{CDCl}_3$ )  $\delta$  7.50 (d, 1H,  $J = 8.0$  Hz), 7.35 (d, 1H,  $J = 8.0$  Hz), 6.84 (s, 2H), 3.06 (t, 2H,  $J = 8.0$  Hz), 2.50 (s, 6H), 2.21 (s, 3H), 2.16 (s, 3H), 1.72-1.66 (m, 2H), 1.57-1.54 (m, 2H), 1.20 (s, 6H);  $^{13}\text{C}$  NMR (101 MHz,  $\text{CDCl}_3$ )  $\delta$  182.17, 174.00, 162.11, 149.30, 143.42, 141.65, 141.12, 138.17, 132.39, 127.98, 125.98, 125.70, 125.56, 125.35, 119.36, 119.33, 36.75, 33.62, 30.78, 28.84, 23.50, 19.90, 18.05, 9.65.

HRMS (ESI) calcd for  $\text{C}_{28}\text{H}_{28}\text{O}_3\text{Se}$ : 493.1278 ( $\text{M}+\text{H}^+$ ), found: 493.1265.

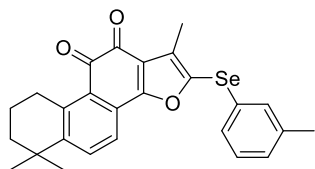

**1,6,6-trimethyl-2-(m-tolylselanyl)-6,7,8,9-tetrahydrophenanthro[1,2-b]furan-10,11-dione (2i).**

(Red solid was obtained in 42% isolated yield, 58.1 mg).  $^1\text{H}$  NMR (400 MHz,  $\text{CDCl}_3$ )  $\delta$  7.54 (q, 2H,  $J_1 = 8.0$  Hz,  $J_2 = 16.0$  Hz), 7.13-7.06 (m, 2H), 7.03 (d, 1H,  $J = 8.0$  Hz), 6.98-6.94 (m, 1H), 3.12 (t, 2H,  $J = 8.0$  Hz), 2.39 (s, 3H), 2.28 (s, 3H), 1.74-1.71 (m, 2H), 1.60-1.57 (m, 2H), 1.23 (s, 6H);  $^{13}\text{C}$  NMR (101 MHz,  $\text{CDCl}_3$ )  $\delta$  182.16, 174.09, 163.23, 149.80, 143.64, 139.03, 136.53, 132.51, 130.32, 129.74, 129.53, 129.10, 126.35, 126.02, 125.87, 125.65, 119.79, 119.54, 36.77, 33.71, 30.80, 28.92, 20.68, 18.07, 9.82.

HRMS (ESI) calcd for  $\text{C}_{26}\text{H}_{24}\text{O}_3\text{Se}$ : 465.0965 ( $\text{M}+\text{H}^+$ ), found: 465.0962.

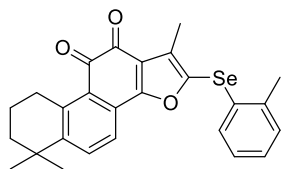

**1,6,6-trimethyl-2-(o-tolylselanyl)-6,7,8,9-tetrahydrophenanthro[1,2-b]furan-10,11-dione (2j).**

(Red solid was obtained in 33% isolated yield, 46.0 mg).  $^1\text{H}$  NMR (400 MHz,  $\text{CDCl}_3$ )  $\delta$  7.54 (q, 2H,  $J_1 = 8.0$  Hz,  $J_2 = 12.0$  Hz), 7.12 (s, 1H), 7.08-7.04 (m, 2H), 6.99-6.96 (m, 1H), 3.11 (t, 2H,  $J = 8.0$  Hz), 2.30 (s, 3H), 2.22 (s, 3H), 1.75-1.70 (m, 2H), 1.59-1.57 (m, 2H), 1.23 (s, 6H);  $^{13}\text{C}$  NMR (101 MHz,  $\text{CDCl}_3$ )  $\delta$  182.15, 174.11, 162.95, 149.74, 143.60, 140.01, 138.48, 132.49, 130.00, 129.13, 128.33, 127.25, 126.57, 126.51, 125.88, 125.65, 119.79, 119.50, 36.77, 33.70, 30.80, 28.91, 20.35, 18.06, 9.88.

HRMS (ESI) calcd for  $\text{C}_{26}\text{H}_{24}\text{O}_3\text{Se}$ : 465.0965 ( $\text{M}+\text{H}^+$ ), found: 465.0956.

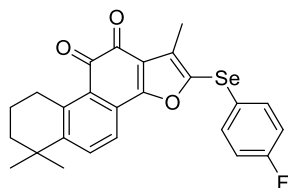

**2-((4-fluorophenyl)selanyl)-1,6,6-trimethyl-6,7,8,9-tetrahydrophenanthro[1,2-b]furan-10,11-**

**dione (2k).** (Red solid was obtained in 77% isolated yield, 107.8 mg).  $^1\text{H}$  NMR (400 MHz,  $\text{CDCl}_3$ )  $\delta$  7.53 (q, 2H,  $J_1 = 8.0$  Hz,  $J_2 = 20.0$  Hz), 7.35-7.30 (m, 2H), 6.89 (t, 2H,  $J = 8.0$  Hz), 3.09 (t, 2H,  $J = 8.0$  Hz), 2.29 (s, 3H), 1.74-1.69 (m, 2H), 1.59-1.56 (m, 2H), 1.22 (s, 6H);  $^{13}\text{C}$  NMR (101 MHz,  $\text{CDCl}_3$ )  $\delta$  181.98, 173.99, 162.89, 161.49 (d,  $J = 249.47$  Hz), 149.84, 143.64, 140.06, 132.49, 132.22 (d,  $J = 8.08$  Hz), 128.79, 125.75, 125.63, 123.60, 123.57, 119.72, 115.72 (d,  $J = 22.2$  Hz), 36.74, 33.70, 30.79, 28.90, 18.04, 9.83.  $^{19}\text{F}$  NMR (376 MHz,  $\text{CDCl}_3$ )  $\delta$  -113.77.

HRMS (ESI) calcd for  $\text{C}_{25}\text{H}_{21}\text{O}_3\text{FSe}$ : 469.0714 ( $\text{M}+\text{H}^+$ ), found: 469.0713.

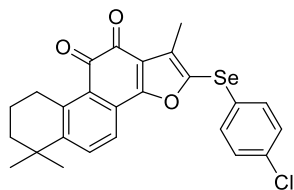

**2-((4-chlorophenyl)selanyl)-1,6,6-trimethyl-6,7,8,9-tetrahydrophenanthro[1,2-b]furan-10,11-**

**dione (2l).** (Red solid was obtained in 91% isolated yield, 131.5 mg).  $^1\text{H}$  NMR (400 MHz,  $\text{CDCl}_3$ )  $\delta$  7.55 (q, 2H,  $J_1 = 8.0$  Hz,  $J_2 = 16.0$  Hz), 7.25-7.22 (m, 2H), 7.18-7.14 (m, 2H), 3.11 (t, 2H,  $J = 8.0$  Hz), 2.30 (s, 3H), 1.74-1.70 (m, 2H), 1.60-1.58 (m, 2H), 1.24 (s, 6H);  $^{13}\text{C}$  NMR (101 MHz,  $\text{CDCl}_3$ )  $\delta$  182.04, 174.06, 163.13, 149.96, 143.72, 139.39, 132.73, 132.53, 130.91, 129.41, 128.69, 127.50, 125.73, 125.71, 119.80, 119.44, 36.75, 33.73, 30.80, 28.93, 18.06, 9.85.

HRMS (ESI) calcd for  $\text{C}_{25}\text{H}_{21}\text{O}_3\text{ClSe}$ : 485.0416 ( $\text{M}+\text{H}^+$ ), found: 485.0417.

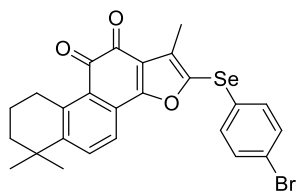

**2-((4-bromophenyl)selanyl)-1,6,6-trimethyl-6,7,8,9-tetrahydrophenanthro[1,2-b]furan-10,11-dione (2m).** (Red solid was obtained in 79% isolated yield, 125.5 mg).  $^1\text{H}$  NMR (400 MHz,  $\text{CDCl}_3$ )  $\delta$  7.55 (q, 2H,  $J_1 = 8.0$  Hz,  $J_2 = 16.0$  Hz), 7.25-7.22 (m, 2H), 7.18-7.14 (m, 2H), 3.11 (t, 2H,  $J = 8.0$  Hz), 2.30 (s, 3H), 1.74-1.70 (m, 2H), 1.60-1.58 (m, 2H), 1.24 (s, 6H);  $^{13}\text{C}$  NMR (101 MHz,  $\text{CDCl}_3$ )  $\delta$  182.01, 174.04, 163.15, 149.97, 143.72, 139.23, 132.53, 131.60, 131.29, 131.08, 131.01, 129.51, 128.27, 125.71, 119.80, 119.43, 36.75, 33.73, 30.80, 28.93, 18.05, 9.85.

HRMS (ESI) calcd for  $\text{C}_{25}\text{H}_{21}\text{O}_3\text{BrSe}$ : 528.9911 ( $\text{M}+\text{H}^+$ ), found: 528.9904.

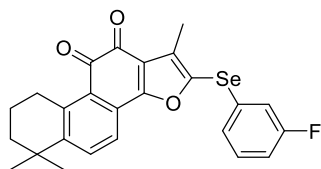

**2-((3-fluorophenyl)selanyl)-1,6,6-trimethyl-6,7,8,9-tetrahydrophenanthro[1,2-b]furan-10,11-dione (2n).** (Red solid was obtained in 44% isolated yield, 61.9 mg).  $^1\text{H}$  NMR (400 MHz,  $\text{CDCl}_3$ )  $\delta$  7.62 (q, 2H,  $J_1 = 8.0$  Hz,  $J_2 = 16.0$  Hz), 7.25-7.20 (m, 1H), 7.11 (d, 1H,  $J = 8.0$  Hz), 7.04-7.01 (m, 1H), 6.95-6.90 (m, 1H), 3.18 (t, 2H,  $J = 8.0$  Hz), 2.37 (s, 3H), 1.81-1.78 (m, 2H), 1.67-1.64 (m, 2H), 1.31 (s, 6H);  $^{13}\text{C}$  NMR (101 MHz,  $\text{CDCl}_3$ )  $\delta$  182.93, 174.98, 162.99 (d,  $J = 254.52$  Hz), 151.03, 144.74, 140.00, 133.56, 132.32 (d,  $J = 7.07$  Hz), 130.98, 130.85, 130.76, 126.72, 125.65, 125.62, 120.85, 120.46, 117.12 (d,  $J = 23.23$  Hz), 114.42 (d,  $J = 21.21$  Hz), 37.78, 34.76, 31.83, 29.96, 19.09, 10.89.  $^{19}\text{F}$  NMR (376 MHz,  $\text{CDCl}_3$ )  $\delta$  -110.80.

HRMS (ESI) calcd for  $\text{C}_{25}\text{H}_{21}\text{O}_3\text{FSe}$ : 469.0714 ( $\text{M}+\text{H}^+$ ), found: 469.0710.

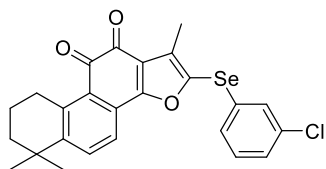

**2-((3-chlorophenyl)selanyl)-1,6,6-trimethyl-6,7,8,9-tetrahydrophenanthro[1,2-b]furan-10,11-dione (2o).** (Red solid was obtained in 25% isolated yield, 36.8 mg).  $^1\text{H}$  NMR (400 MHz,  $\text{CDCl}_3$ )  $\delta$  7.62 (q, 2H,  $J_1 = 8.0$  Hz,  $J_2 = 12.0$  Hz), 7.32 (d, 1H,  $J = 4.0$  Hz), 7.24-7.16 (m, 3H), 3.19 (t, 2H,  $J$

= 8.0 Hz), 2.38 (s, 3H), 1.83-1.78 (m, 2H), 1.67-1.65 (m, 2H), 1.31 (s, 6H) ;  $^{13}\text{C}$  NMR (101 MHz,  $\text{CDCl}_3$ )  $\delta$  183.03, 175.08, 164.29, 151.04, 144.75, 139.95, 135.30, 133.57, 132.11, 130.97, 130.54, 129.95, 128.26, 127.61, 126.78, 126.74, 120.88, 120.48, 37.79, 34.77, 31.84, 29.97, 19.09, 10.92.

HRMS (ESI) calcd for  $\text{C}_{25}\text{H}_{21}\text{O}_3\text{ClSe}$ : 485.0416 ( $\text{M}+\text{H}^+$ ), found: 485.0417.

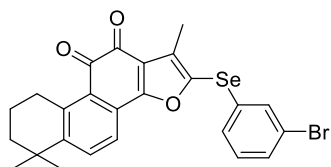

**2-((3-bromophenyl)selanyl)-1,6,6-trimethyl-6,7,8,9-tetrahydrophenanthro[1,2-b]furan-10,11-dione (2p).** (Red solid was obtained in 29% isolated yield, 45.8 mg).  $^1\text{H}$  NMR (400 MHz,  $\text{CDCl}_3$ )  $\delta$  7.62 (q, 2H,  $J_1 = 8.0$  Hz,  $J_2 = 12.0$  Hz), 7.49 (d, 1H,  $J = 8.0$  Hz), 7.37 (d, 1H,  $J = 8.0$  Hz), 7.28-7.25 (m, 1H), 7.12 (t, 1H,  $J = 8.0$  Hz), 3.18 (t, 2H,  $J = 8.0$  Hz), 2.38 (s, 3H), 1.83-1.78 (m, 2H), 1.67-1.64 (m, 2H), 1.31 (s, 6H) ;  $^{13}\text{C}$  NMR (101 MHz,  $\text{CDCl}_3$ )  $\delta$  183.00, 175.04, 164.28, 151.04, 144.75, 139.98, 133.58, 132.77, 132.40, 130.94, 130.87, 130.51, 128.77, 126.75, 126.72, 123.41, 120.88, 120.47, 37.79, 34.76, 31.84, 29.97, 19.09, 10.94.

HRMS (ESI) calcd for  $\text{C}_{25}\text{H}_{21}\text{O}_3\text{BrSe}$ : 528.9911 ( $\text{M}+\text{H}^+$ ), found: 528.9907.

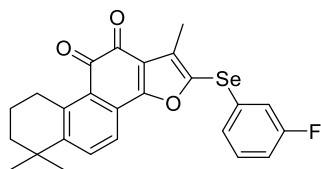

**2-((2-fluorophenyl)selanyl)-1,6,6-trimethyl-6,7,8,9-tetrahydrophenanthro[1,2-b]furan-10,11-dione (2q).** (Red solid was obtained in 41% isolated yield, 57.0 mg).  $^1\text{H}$  NMR (400 MHz,  $\text{CDCl}_3$ )  $\delta$  7.61 (q, 2H,  $J_1 = 8.0$  Hz,  $J_2 = 16.0$  Hz), 7.24-7.20 (m, 1H), 7.15-7.11 (m, 1H), 7.06 (t, 1H,  $J = 8.0$  Hz), 7.01 (t, 1H,  $J = 8.0$  Hz), 3.18 (t, 2H,  $J = 8.0$  Hz), 2.37 (s, 3H), 1.81-1.78 (m, 2H), 1.67-1.64 (m, 2H), 1.31 (s, 6H) ;  $^{13}\text{C}$  NMR (101 MHz,  $\text{CDCl}_3$ )  $\delta$  182.98, 174.97, 164.34, 160.32 (d,  $J = 245.43$  Hz), 150.98, 144.69, 141.31, 138.58, 133.56, 131.80, 129.36 (d,  $J = 7.07$  Hz), 126.74, 125.23, 125.20, 120.85, 120.23, 117.37 (d,  $J = 22.22$  Hz), 115.85 (d,  $J = 22.22$  Hz), 37.78, 34.75, 31.84, 29.95, 19.09, 10.86.  $^{19}\text{F}$  NMR (376 MHz,  $\text{CDCl}_3$ )  $\delta$  -105.75.

HRMS (ESI) calcd for  $\text{C}_{25}\text{H}_{21}\text{O}_3\text{FSe}$ : 469.0714 ( $\text{M}+\text{H}^+$ ), found: 469.0710.

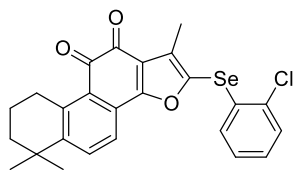

**2-((2-chlorophenyl)selanyl)-1,6,6-trimethyl-6,7,8,9-tetrahydrophenanthro[1,2-b]furan-10,11-dione (2r).** (Red solid was obtained in 21% isolated yield, 30.5 mg).  $^1\text{H}$  NMR (400 MHz,  $\text{CDCl}_3$ )  $\delta$  7.65 (q, 2H,  $J_1 = 8.0$  Hz,  $J_2 = 12.0$  Hz), 7.35 (d, 1H,  $J = 8.0$  Hz), 7.16 (t, 1H,  $J = 8.0$  Hz), 7.08 (t, 1H,  $J = 8.0$  Hz), 6.87 (d, 1H,  $J = 8.0$  Hz) 3.20 (t, 2H,  $J = 8.0$  Hz), 2.37 (s, 3H), 1.82-1.79 (m, 2H), 1.68-1.65 (m, 2H), 1.31 (s, 6H);  $^{13}\text{C}$  NMR (101 MHz,  $\text{CDCl}_3$ )  $\delta$  183.06, 175.07, 164.79, 151.14, 144.79, 139.11, 133.62, 132.59, 132.45, 131.79, 129.80, 129.10, 127.87, 127.77, 126.79, 126.73, 120.95, 120.55, 37.79, 34.79, 31.84, 29.98, 19.10, 10.87.

HRMS (ESI) calcd for  $\text{C}_{25}\text{H}_{21}\text{O}_3\text{ClSe}$ : 485.0416 ( $\text{M}+\text{H}^+$ ), found: 485.0398.

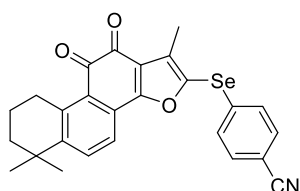

**4-((1,6,6-trimethyl-10,11-dioxo-6,7,8,9,10,11-hexahydrophenanthro[1,2-b]furan-2-yl)selanyl)benzonitrile (2s).** (Red solid was obtained in 30% isolated yield, 42.7 mg).  $^1\text{H}$  NMR (400 MHz,  $\text{CDCl}_3$ )  $\delta$  7.63 (q, 2H,  $J_1 = 8.0$  Hz,  $J_2 = 20.0$  Hz), 7.51 (d, 2H,  $J = 12.0$  Hz), 7.36 (d, 2H,  $J = 8.0$  Hz), 3.20 (t, 2H,  $J = 8.0$  Hz), 2.38 (s, 3H), 1.84-1.78 (m, 2H), 1.68-1.65 (m, 2H), 1.32 (s, 6H);  $^{13}\text{C}$  NMR (101 MHz,  $\text{CDCl}_3$ )  $\delta$  182.84, 174.97, 164.69, 151.36, 144.92, 138.53, 138.35, 133.63, 132.85, 132.06, 129.46, 126.82, 126.52, 120.90, 120.44, 118.38, 110.69, 37.75, 34.81, 31.84, 29.99, 19.07, 10.89.

HRMS (ESI) calcd for  $\text{C}_{26}\text{H}_{21}\text{NOSe}$ : 476.0761 ( $\text{M}+\text{H}^+$ ), found: 476.0759.

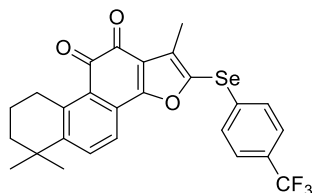

**1,6,6-trimethyl-2-((4-(trifluoromethyl)phenyl)selanyl)-6,7,8,9-tetrahydrophenanthro[1,2-b]furan-10,11-dione (2t).** (Red solid was obtained in 46% isolated yield, 71.1 mg).  $^1\text{H}$  NMR (400 MHz,  $\text{CDCl}_3$ )  $\delta$  7.63 (q, 2H,  $J_1 = 12.0$  Hz,  $J_2 = 16.0$  Hz), 7.50 (d, 2H,  $J = 8.0$  Hz), 7.41 (d, 2H,  $J =$



8.0 Hz), 3.19 (t, 2H,  $J = 8.0$  Hz), 2.38 (s, 3H), 1.83-1.79 (m, 2H), 1.68-1.65 (m, 2H), 1.31 (s, 6H);  $^{13}\text{C}$  NMR (101 MHz,  $\text{CDCl}_3$ )  $\delta$  182.91, 174.99, 164.45, 151.18, 144.82, 139.34, 135.91, 133.59, 131.45, 129.67, 129.44 (q,  $J_1 = 32.3$  Hz,  $J_2 = 65.6$  Hz), 126.77, 126.63, 126.32 (q,  $J_1 = 4.0$  Hz,  $J_2 = 8.1$  Hz), 123.90 (q,  $J_1 = 272.7$  Hz,  $J_2 = 546.4$  Hz), 120.87, 120.46, 37.76, 34.78, 31.83, 29.97, 19.08, 10.90.  $^{19}\text{F}$  NMR (376 MHz,  $\text{CDCl}_3$ )  $\delta$  -62.69.

HRMS (ESI) calcd for  $\text{C}_{26}\text{H}_{21}\text{O}_3\text{F}_3\text{Se}$ : 519.0683 ( $\text{M}+\text{H}^+$ ), found: 519.0677.

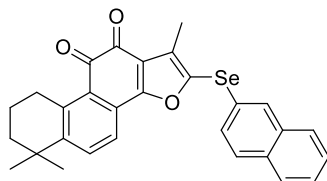

**1,6,6-trimethyl-2-(naphthalen-2-ylselanyl)-6,7,8,9-tetrahydrophenanthro[1,2-b]furan-10,11-dione (2u).** (Red solid was obtained in 67% isolated yield, 100.5 mg).  $^1\text{H}$  NMR (400 MHz,  $\text{CDCl}_3$ )  $\delta$  7.85 (s, 1H), 7.76-7.74 (m, 1H), 7.70 (d, 2H,  $J = 8.0$  Hz), 7.60-7.57 (m, 2H), 7.47-7.43 (m, 2H), 7.40 (d, 1H,  $J = 8.0$  Hz), 3.16 (t, 2H,  $J = 8.0$  Hz), 2.40 (s, 3H), 1.79-1.76 (m, 2H), 1.65-1.62 (m, 2H), 1.29 (s, 6H);  $^{13}\text{C}$  NMR (101 MHz,  $\text{CDCl}_3$ )  $\delta$  183.06, 175.06, 164.03, 150.81, 144.62, 141.30, 140.92, 133.94, 133.50, 132.35, 130.31, 129.43, 129.15, 127.92, 127.83, 127.71, 127.31, 126.84, 126.79, 126.66, 126.35, 120.82, 37.80, 34.73, 31.83, 29.95, 19.10, 10.95.

HRMS (ESI) calcd for  $\text{C}_{29}\text{H}_{24}\text{O}_3\text{Se}$ : 501.0966 ( $\text{M}+\text{H}^+$ ), found: 501.0967.

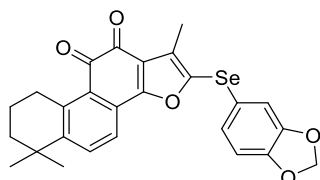

**2-(benzo[d][1,3]dioxol-5-ylselanyl)-1,6,6-trimethyl-6,7,8,9-tetrahydrophenanthro[1,2-b]furan-10,11-dione (2v).** (Red solid was obtained in 33% isolated yield, 48.3 mg).  $^1\text{H}$  NMR (400 MHz,  $\text{CDCl}_3$ )  $\delta$  7.62 (q, 2H,  $J_1 = 8.0$  Hz,  $J_2 = 8.0$  Hz), 6.98 (dd, 1H,  $J_1 = 4.0$  Hz,  $J_2 = 8.0$  Hz), 6.92 (s, 1H), 6.72 (d, 1H,  $J = 8.0$  Hz), 5.94 (s, 2H), 3.17 (t, 2H,  $J = 8.0$  Hz), 2.37 (s, 3H), 1.81-1.78 (m, 2H), 1.67-1.64 (m, 2H), 1.30 (s, 6H);  $^{13}\text{C}$  NMR (101 MHz,  $\text{CDCl}_3$ )  $\delta$  183.06, 175.06, 164.03, 150.81, 144.62, 141.30, 140.92, 133.94, 133.50, 132.35, 130.31, 129.43, 129.15, 127.92, 127.83, 127.71, 127.31, 126.84, 126.79, 126.66, 126.35, 120.82, 37.80, 34.73, 31.83, 29.95, 19.10, 10.95.

HRMS (ESI) calcd for  $\text{C}_{26}\text{H}_{22}\text{O}_5\text{Se}$ : 495.0707 ( $\text{M}+\text{H}^+$ ), found: 495.0708.

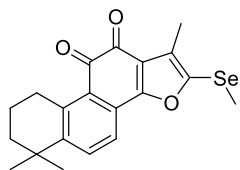

**1,6,6-trimethyl-2-(methyiselanyl)-6,7,8,9-tetrahydrophenanthro[1,2-b]furan-10,11-dione (2w).**

(Red solid was obtained in 59% isolated yield, 68.3 mg).  $^1\text{H}$  NMR (400 MHz,  $\text{CDCl}_3$ )  $\delta$  7.54 (q, 2H,  $J_1 = 8.0$  Hz,  $J_2 = 16.0$  Hz), 3.10 (t, 2H,  $J = 8.0$  Hz), 2.23 (d, 6H,  $J = 8.0$  Hz), 1.73-1.70 (m, 2H), 1.60-1.57 (m, 2H), 1.24 (s, 6H);  $^{13}\text{C}$  NMR (101 MHz,  $\text{CDCl}_3$ )  $\delta$  183.28, 175.11, 163.40, 150.47, 144.56, 141.65, 133.48, 127.49, 127.04, 126.48, 120.53, 120.24, 37.82, 34.70, 31.84, 29.93, 19.11, 10.70, 9.17.

HRMS (ESI) calcd for  $\text{C}_{20}\text{H}_{20}\text{O}_3\text{Se}$ : 389.0652 ( $\text{M}+\text{H}^+$ ), found: 389.0653.

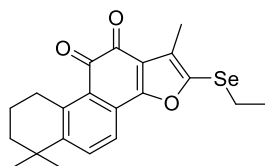

**2-(ethyiselanyl)-1,6,6-trimethyl-6,7,8,9-tetrahydrophenanthro[1,2-b]furan-10,11-dione (2x).**

(Red solid was obtained in 87% isolated yield, 104.3 mg).  $^1\text{H}$  NMR (400 MHz,  $\text{CDCl}_3$ )  $\delta$  7.63 (q, 2H,  $J_1 = 8.0$  Hz,  $J_2 = 12.0$  Hz), 3.18 (t, 2H,  $J = 8.0$  Hz), 2.84 (q, 2H,  $J_1 = 8.0$  Hz,  $J_2 = 16.0$  Hz), 2.33 (s, 3H), 1.83-1.77 (m, 2H), 1.67-1.64 (m, 2H), 1.44 (t, 3H,  $J = 8.0$  Hz), 1.31 (s, 6H);  $^{13}\text{C}$  NMR (101 MHz,  $\text{CDCl}_3$ )  $\delta$  183.37, 175.19, 163.62, 150.51, 144.57, 141.17, 133.49, 128.92, 127.09, 126.54, 120.61, 120.50, 37.83, 34.71, 31.85, 29.94, 23.33, 19.11, 16.10, 10.90.

HRMS (ESI) calcd for  $\text{C}_{21}\text{H}_{22}\text{O}_3\text{Se}$ : 403.0808 ( $\text{M}+\text{H}^+$ ), found: 403.0810.

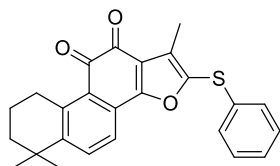

**1,6,6-trimethyl-2-(phenylthio)-6,7,8,9-tetrahydrophenanthro[1,2-b]furan-10,11-dione (2y).**

(Red solid was obtained in 36% isolated yield, 43.1 mg).  $^1\text{H}$  NMR (400 MHz,  $\text{CDCl}_3$ )  $\delta$  7.55 (q, 2H,  $J_1 = 8.0$  Hz,  $J_2 = 20.0$  Hz), 7.21-7.19 (m, 2H), 7.16-7.12 (m, 3H), 3.12 (t, 2H,  $J = 8.0$  Hz), 2.31 (s, 3H), 1.75-1.69 (m, 2H), 1.60-1.57 (m, 2H), 1.23 (s, 6H);  $^{13}\text{C}$  NMR (101 MHz,  $\text{CDCl}_3$ )  $\delta$  182.04, 174.10, 162.12, 149.97, 143.68, 143.01, 133.77, 132.52, 128.67, 128.34, 126.74, 125.87, 125.83,

125.77, 119.89, 119.61, 36.76, 33.73, 30.80, 28.93, 18.06, 9.24.

HRMS (ESI) calcd for C<sub>25</sub>H<sub>22</sub>O<sub>3</sub>S: 403.1362 (M+H<sup>+</sup>), found: 403.1372.

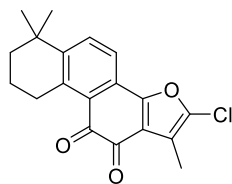

**2-chloro-1,6,6-trimethyl-6,7,8,9-tetrahydrophenanthro[1,2-b]furan-10,11-dione (2z).** (Red solid was obtained in 41% isolated yield, 40.1 mg). <sup>1</sup>H NMR (400 MHz, CDCl<sub>3</sub>) δ 7.63 (d, 1H, *J* = 8.0 Hz), 7.51 (d, 1H, *J* = 8.0 Hz), 3.16 (t, 2H, *J* = 8.0 Hz), 2.22 (s, 3H), 1.83-1.77 (m, 2H), 1.67-1.64 (m, 2H), 1.31 (s, 6H); <sup>13</sup>C NMR (101 MHz, CDCl<sub>3</sub>) δ 182.61, 174.80, 159.62, 150.60, 144.91, 137.10, 133.61, 126.54, 126.36, 120.64, 120.18, 115.83, 37.77, 34.72, 31.81, 29.98, 19.06, 8.60.

HRMS (ESI) calcd for C<sub>19</sub>H<sub>17</sub>ClO<sub>3</sub>: 329.0939 (M+H<sup>+</sup>), found: 329.0942.

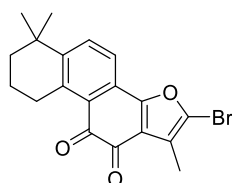

**2-bromo-1,6,6-trimethyl-6,7,8,9-tetrahydrophenanthro[1,2-b]furan-10,11-dione (2za).** (Red solid was obtained in 65% isolated yield, 72.2 mg). <sup>1</sup>H NMR (400 MHz, CDCl<sub>3</sub>) δ 7.55 (d, 1H, *J* = 8.0 Hz), 7.43 (d, 1H, *J* = 12.0 Hz), 3.09 (t, 2H, *J* = 8.0 Hz), 2.13 (s, 3H), 1.74-1.71 (m, 2H), 1.60-1.57 (m, 2H), 1.24 (s, 6H); <sup>13</sup>C NMR (101 MHz, CDCl<sub>3</sub>) δ 182.64, 174.66, 161.79, 150.65, 144.88, 133.61, 126.62, 126.30, 124.80, 120.76, 120.48, 120.28, 37.77, 34.73, 31.82, 29.98, 19.07, 9.49.

HRMS (ESI) calcd for C<sub>19</sub>H<sub>17</sub>BrO<sub>3</sub>: 373.0434 (M+H<sup>+</sup>), found: 373.0437.

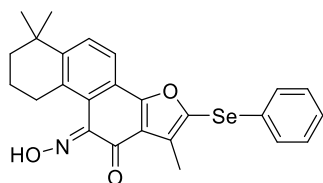

**(E)-10-(hydroxyimino)-1,6,6-trimethyl-2-(phenylselanyl)-7,8,9,10-tetrahydrophenanthro[1,2-b]furan-11(6H)-one (3a).** (Red solid was obtained in 69% isolated yield, 160.8 mg). <sup>1</sup>H NMR (400 MHz, CDCl<sub>3</sub>) δ 7.56 (d, 1H, *J* = 8.0 Hz), 7.46 (d, 1H, *J* = 8.0 Hz), 7.23 (d, 2H, *J* = 8.0 Hz), 7.13-7.10 (m, 3H), 3.16 (t, 2H, *J* = 8.0 Hz), 2.25 (s, 3H), 1.72-1.69 (m, 2H), 1.57-1.55 (m, 2H), 1.22 (s, 6H); <sup>13</sup>C NMR (101 MHz, CDCl<sub>3</sub>) δ 185.54, 151.27, 147.43, 144.56, 143.50, 140.26, 134.83,

131.30, 130.07, 129.46, 128.77, 128.65, 127.02, 125.36, 119.29, 117.31, 37.79, 34.66, 31.93, 30.96, 19.39, 12.54.

HRMS (ESI) calcd for C<sub>25</sub>H<sub>23</sub>NO<sub>3</sub>Se: 465.0960 (M+H<sup>+</sup>), found: 465.0962.

## References

- (1) Dapkekar, Anil Balajirao; Satyanarayana, Gedu. Electrochemical selenofunctionalization of unactivated alkenes: access to  $\beta$ -hydroxy-selenides. *Org. Biomol. Chem.*, **2024**,22,1775-1781.
- (2) Jun Xie , Jiahui Liu , Heng Liu , Shihui Liang , Meigui Lin , Yueyu Gu , Taoli Liu , Dongmei Wang , Hui Ge , Sui-lin Mo. The antitumor effect of tanshinone IIA on anti-proliferation and decreasing VEGF/VEGFR2 expression on the human non-small cell lung cancer A549 cell line. *Acta Pharm. Sin. B.* **2015**,6,554-563.

# Copies of $^1\text{H}$ NMR, $^{13}\text{C}$ NMR, $^{19}\text{F}$ NMR and HRMS spectra

$^1\text{H}$  NMR (400 MHz,  $\text{CDCl}_3$ ) of compound **2a**

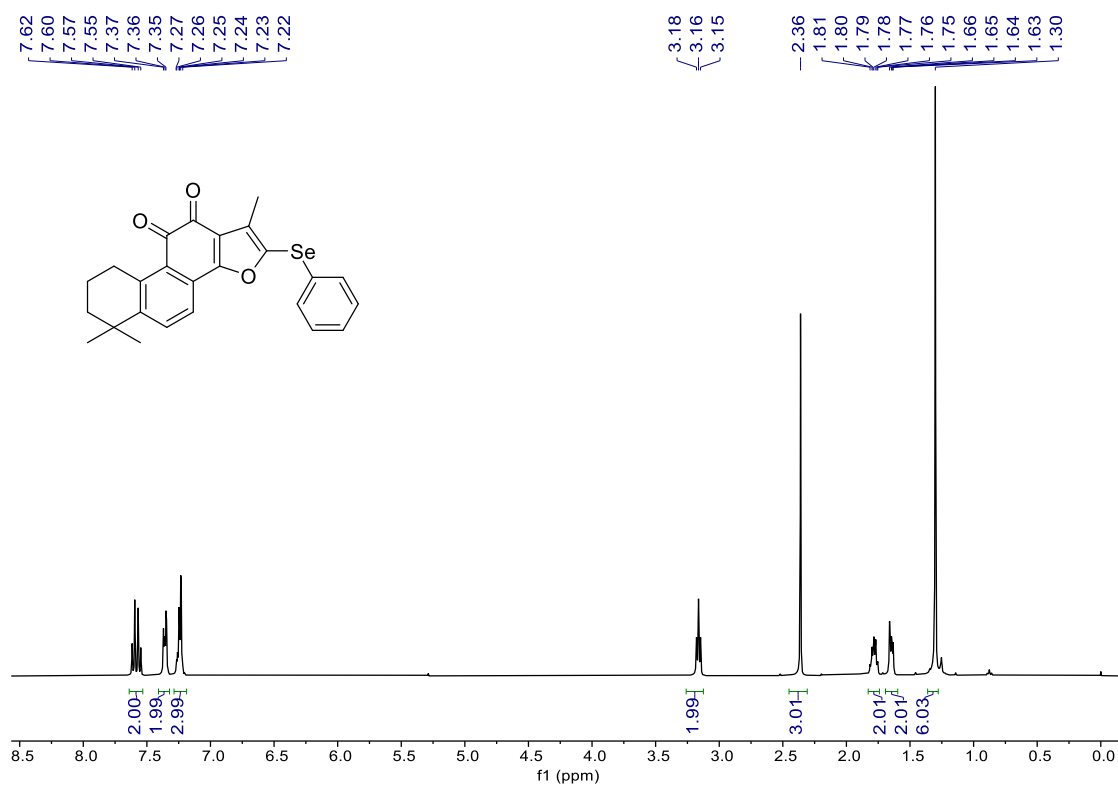

$^{13}\text{C}$  NMR (101 MHz,  $\text{CDCl}_3$ ) of compound **2a**

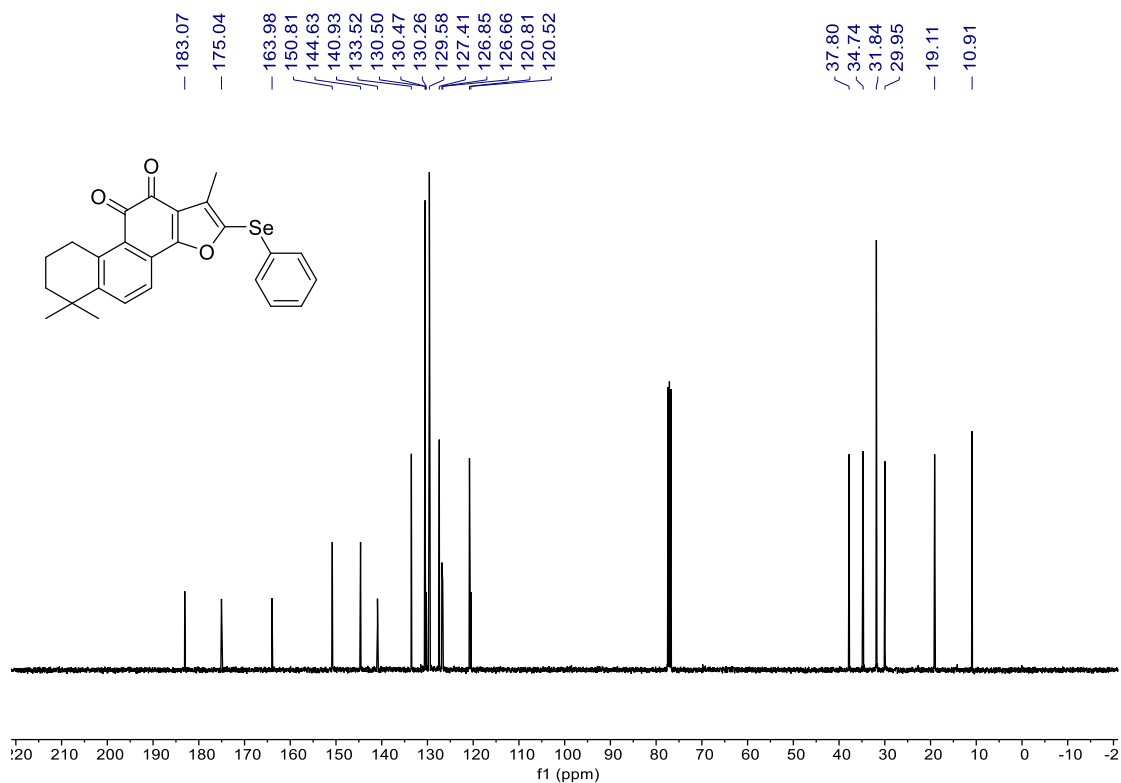

HRMS(ESI) of compound **2a**

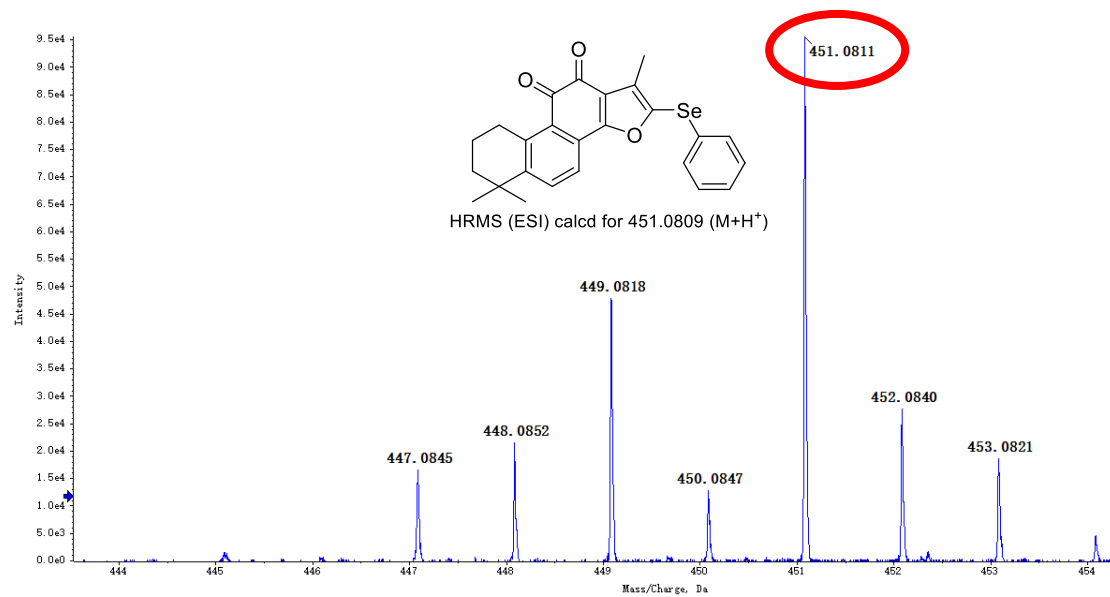

$^1\text{H}$  NMR (400 MHz,  $\text{CDCl}_3$ ) of compound **2b**

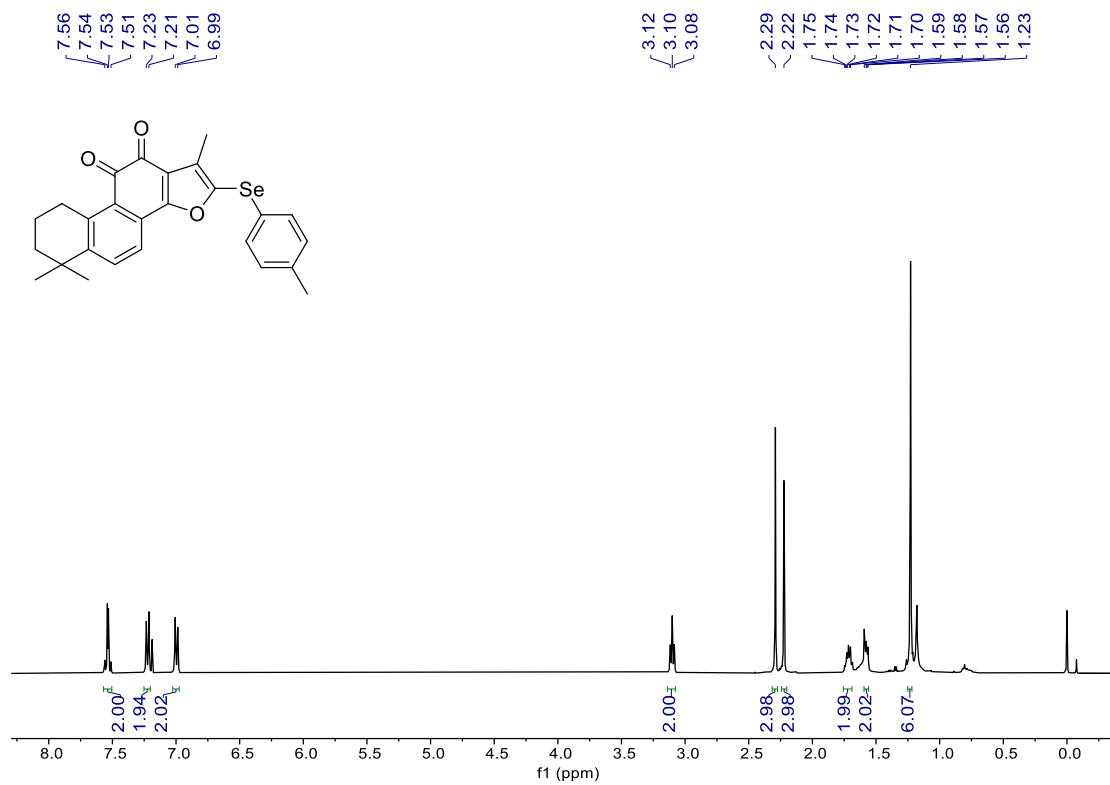

$^{13}\text{C}$  NMR (101 MHz,  $\text{CDCl}_3$ ) of compound **2b**

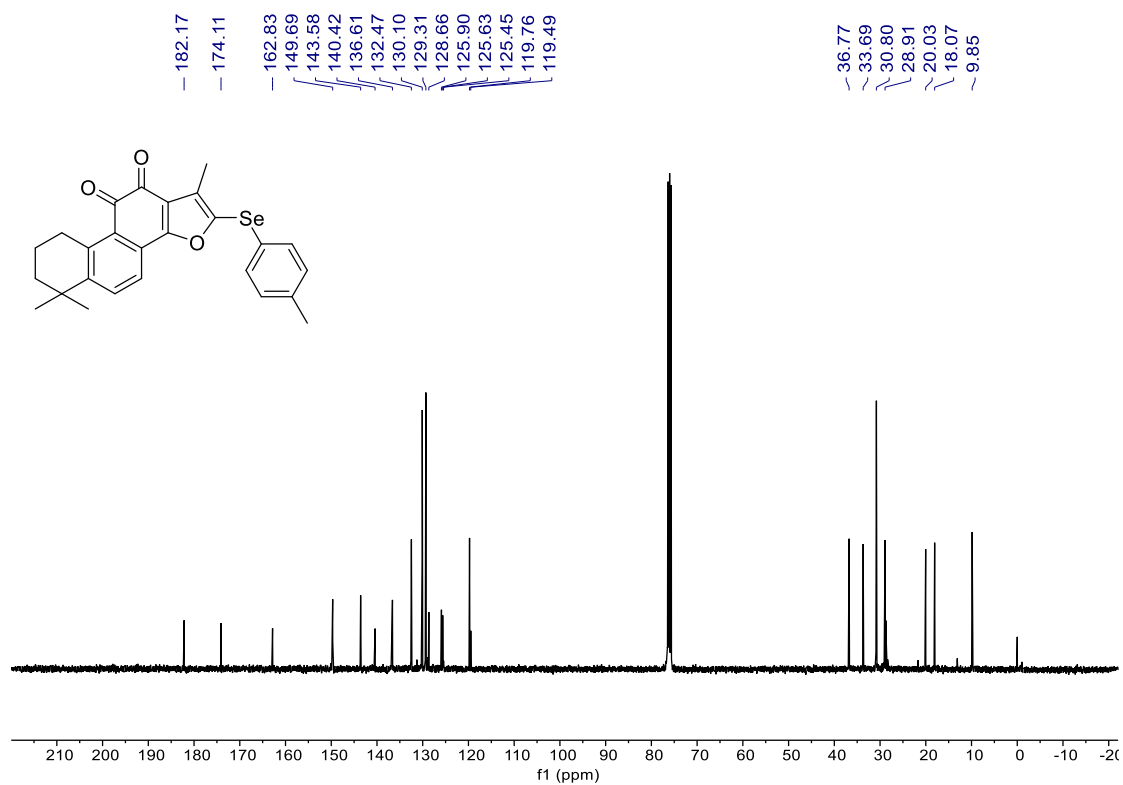

HRMS(ESI) of compound **2b**

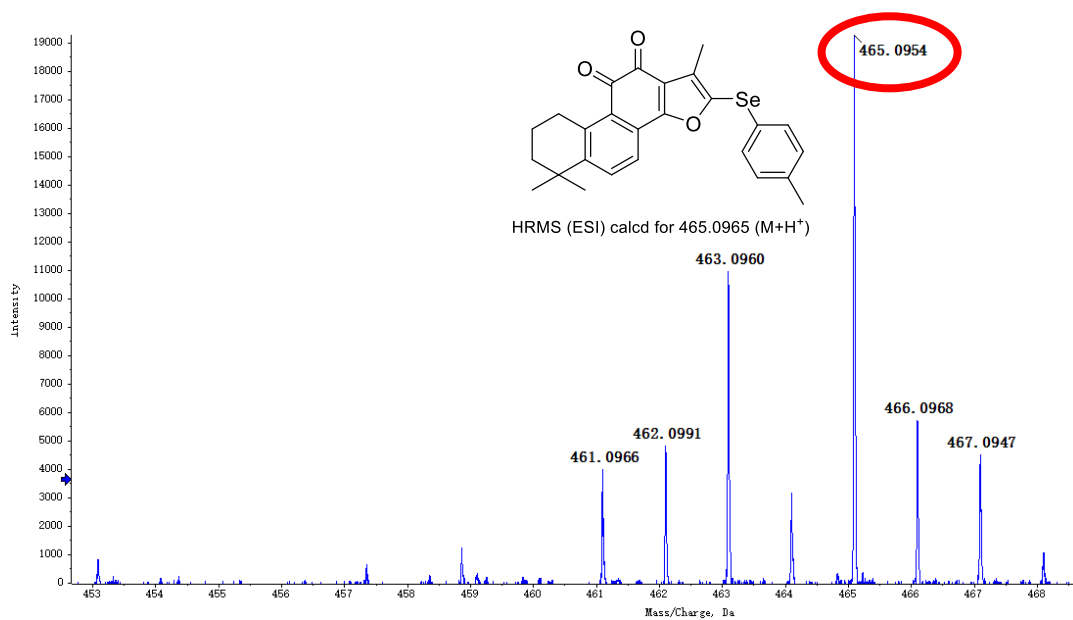

$^1\text{H}$  NMR (400 MHz,  $\text{CDCl}_3$ ) of compound **2c**

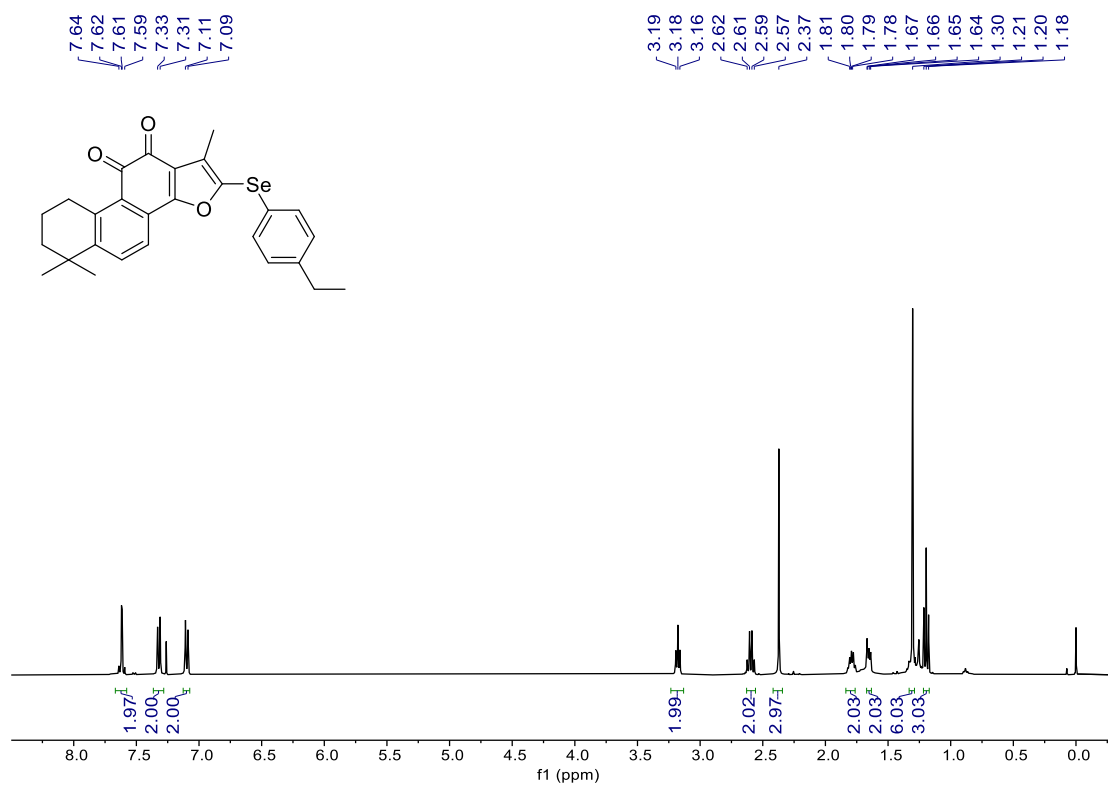

$^{13}\text{C}$  NMR (101 MHz,  $\text{CDCl}_3$ ) of compound **2c**

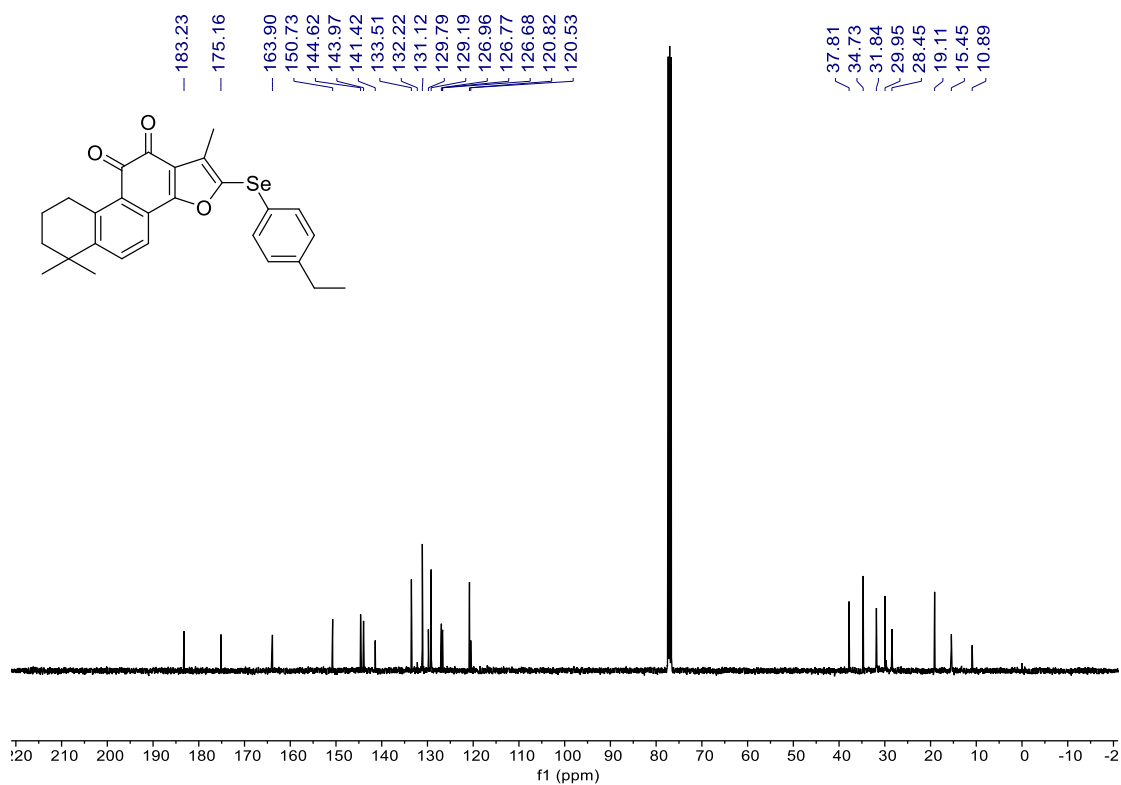



HRMS(ESI) of compound **2c**

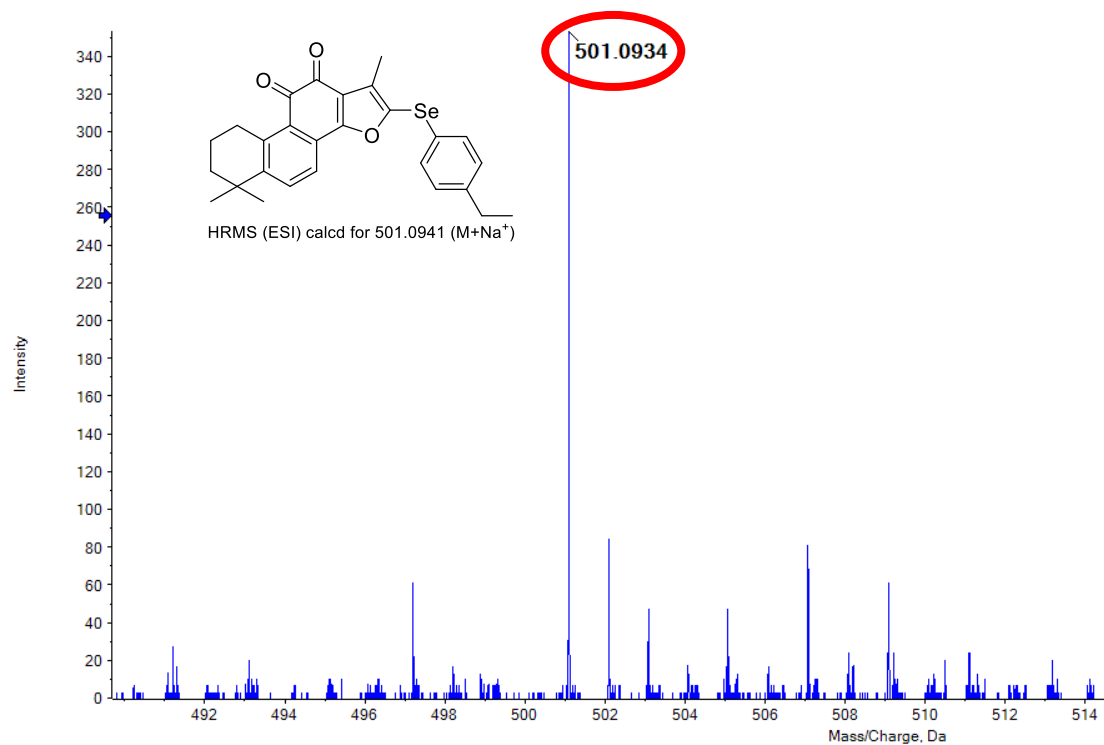

$^1H$  NMR (400 MHz,  $CDCl_3$ ) of compound **2d**

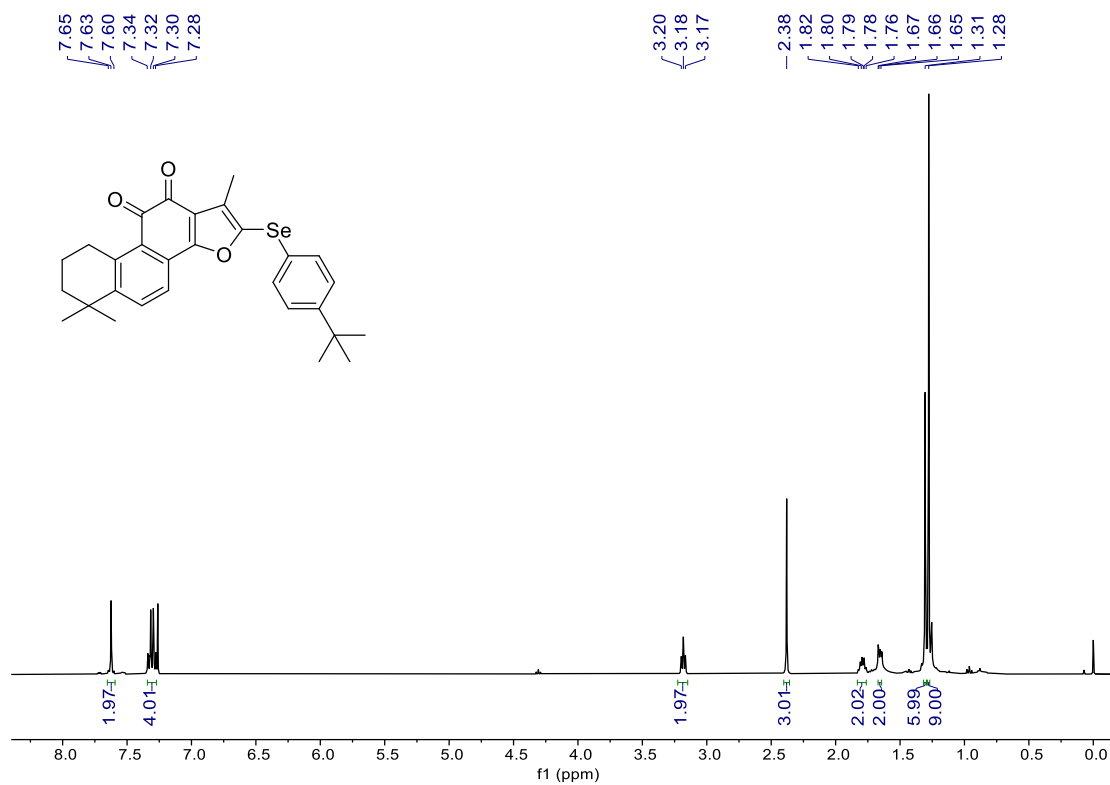

$^{13}\text{C}$  NMR (101 MHz,  $\text{CDCl}_3$ ) of compound **2d**

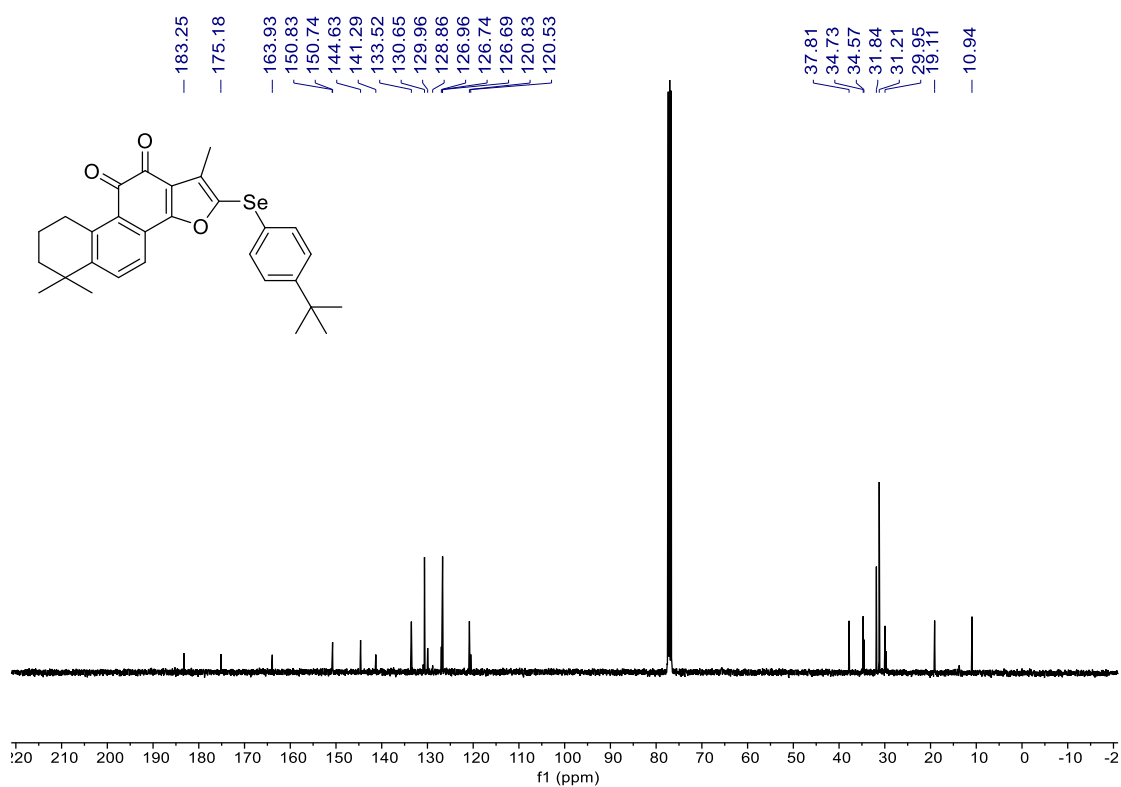

HRMS(ESI) of compound **2d**

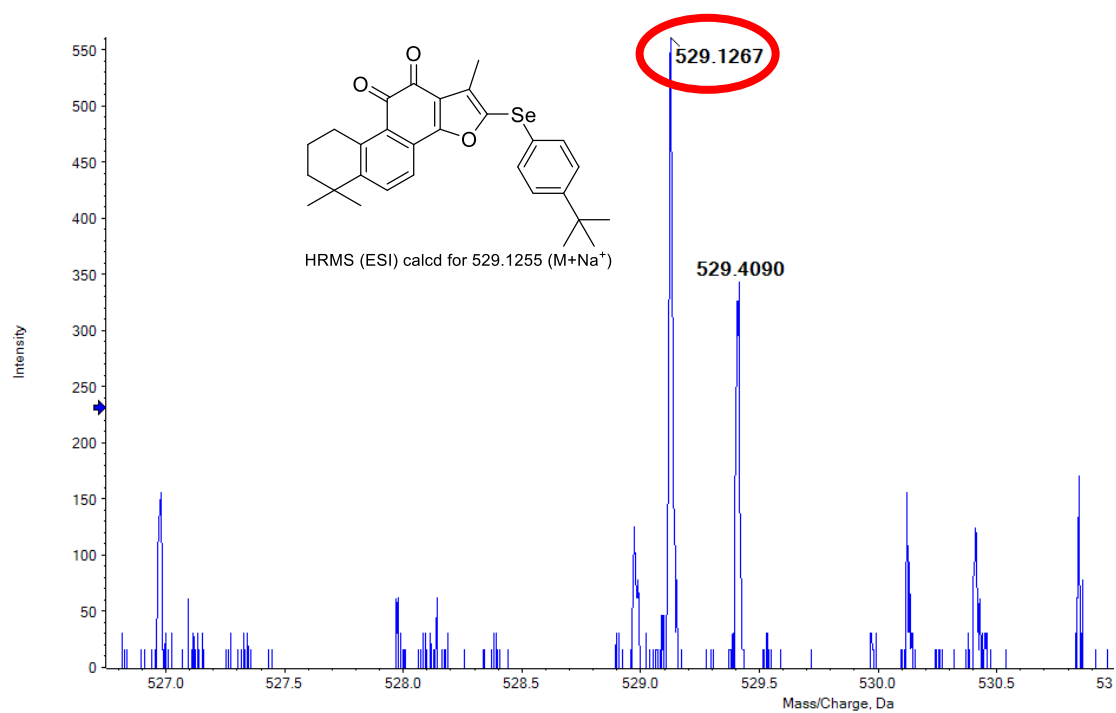

$^1\text{H}$  NMR (400 MHz,  $\text{CDCl}_3$ ) of compound **2e**

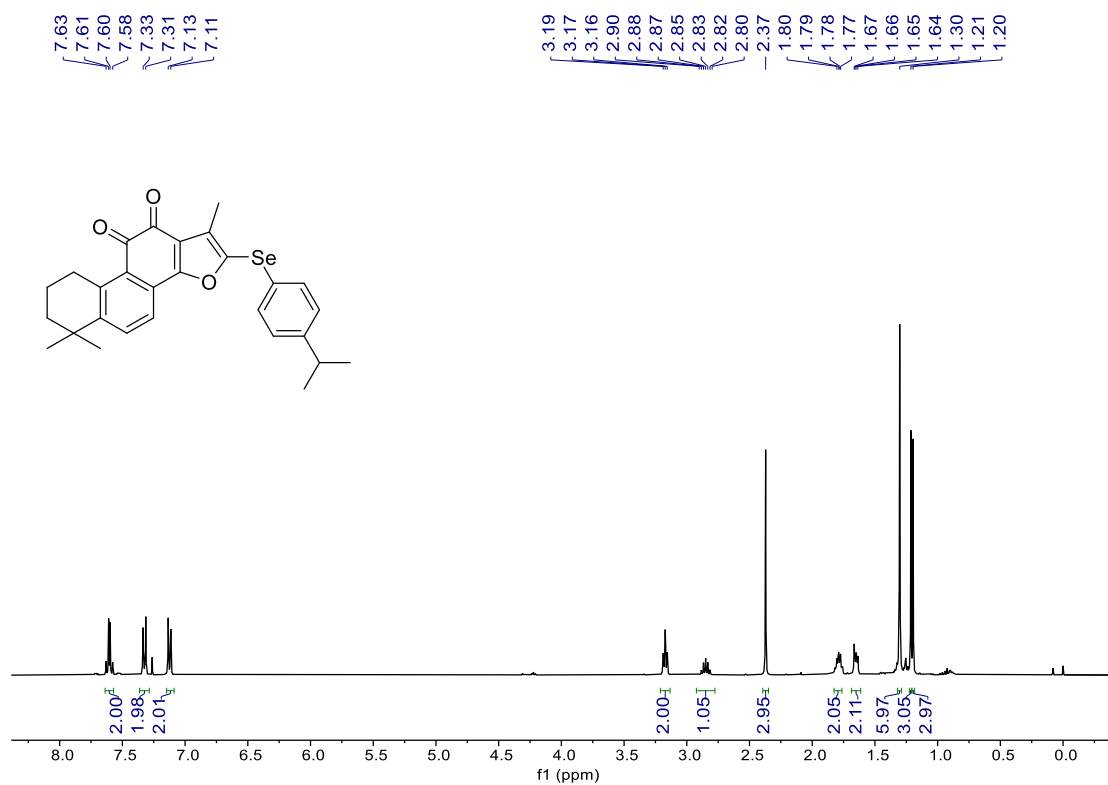

$^{13}\text{C}$  NMR (101 MHz,  $\text{CDCl}_3$ ) of compound **2e**

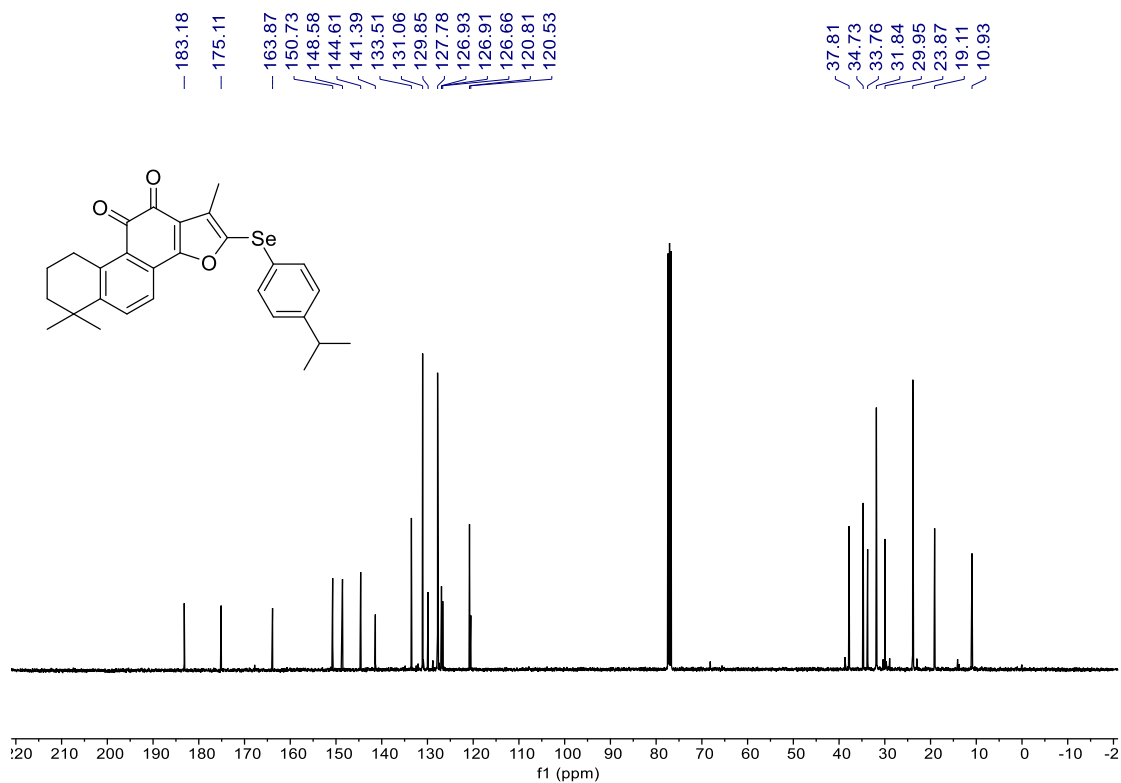

HRMS(ESI) of compound **2e**

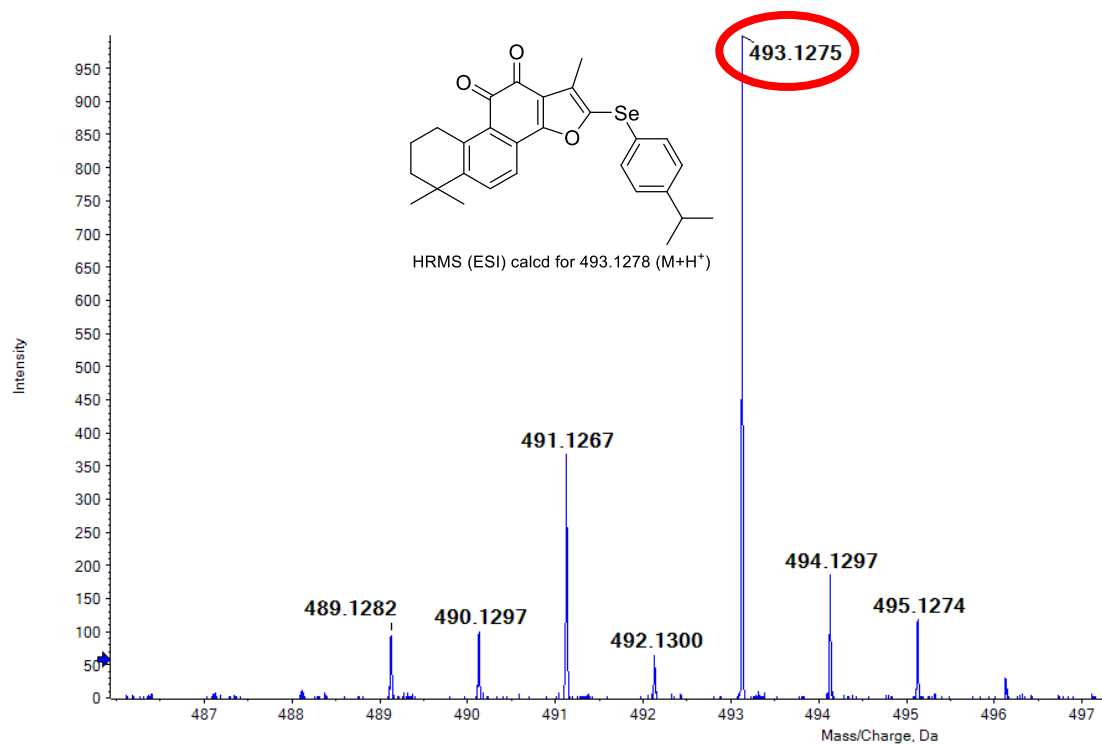

$^1\text{H}$  NMR (400 MHz,  $\text{CDCl}_3$ ) of compound **2f**

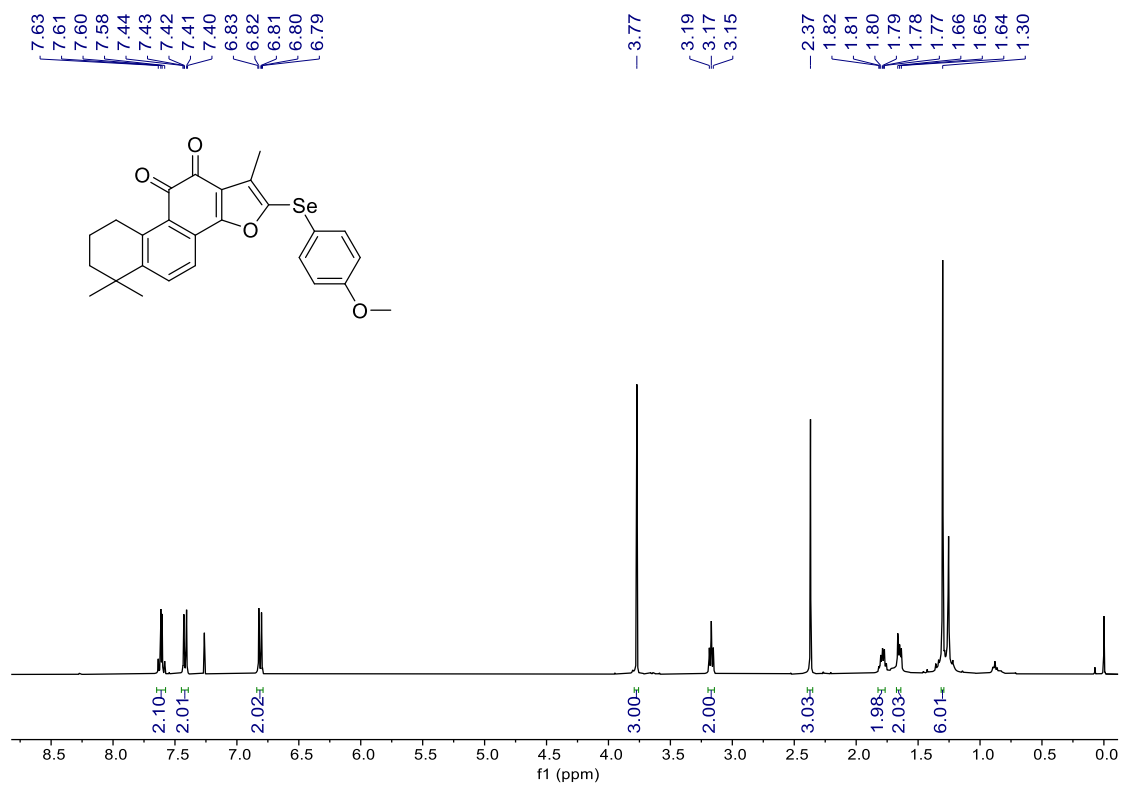

$^{13}\text{C}$  NMR (101 MHz,  $\text{CDCl}_3$ ) of compound **2f**

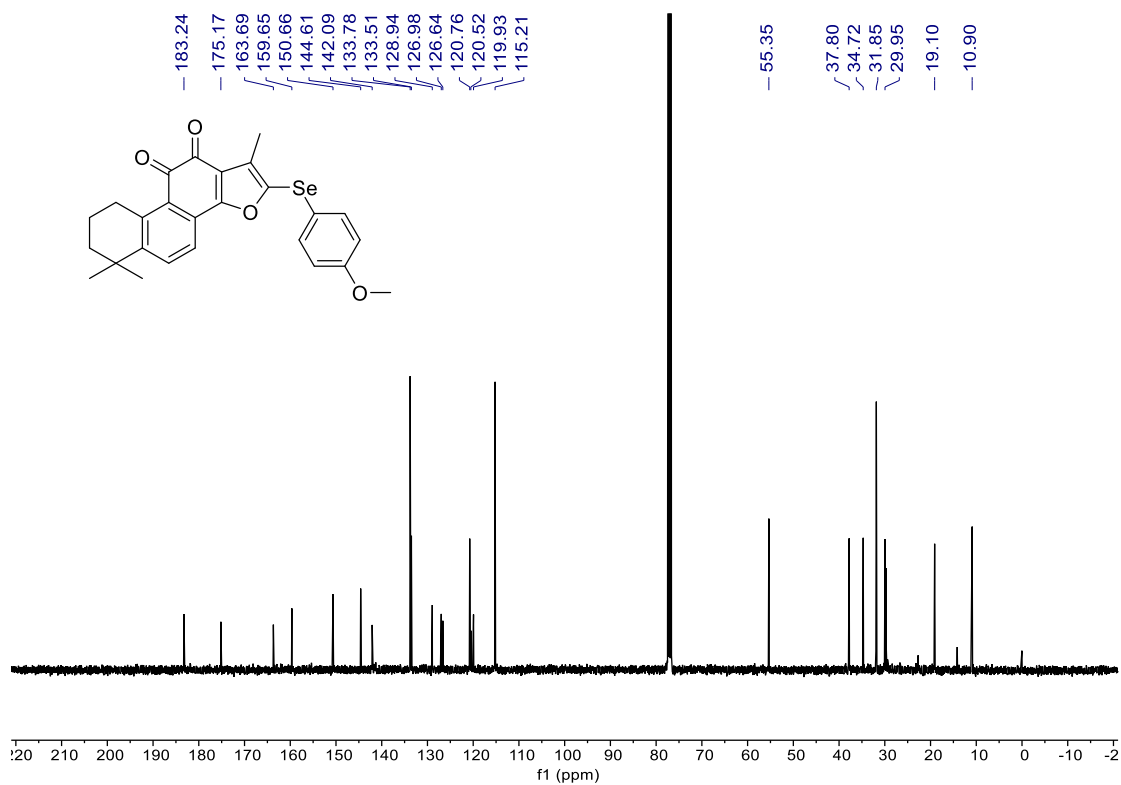

HRMS(ESI) of compound **2f**

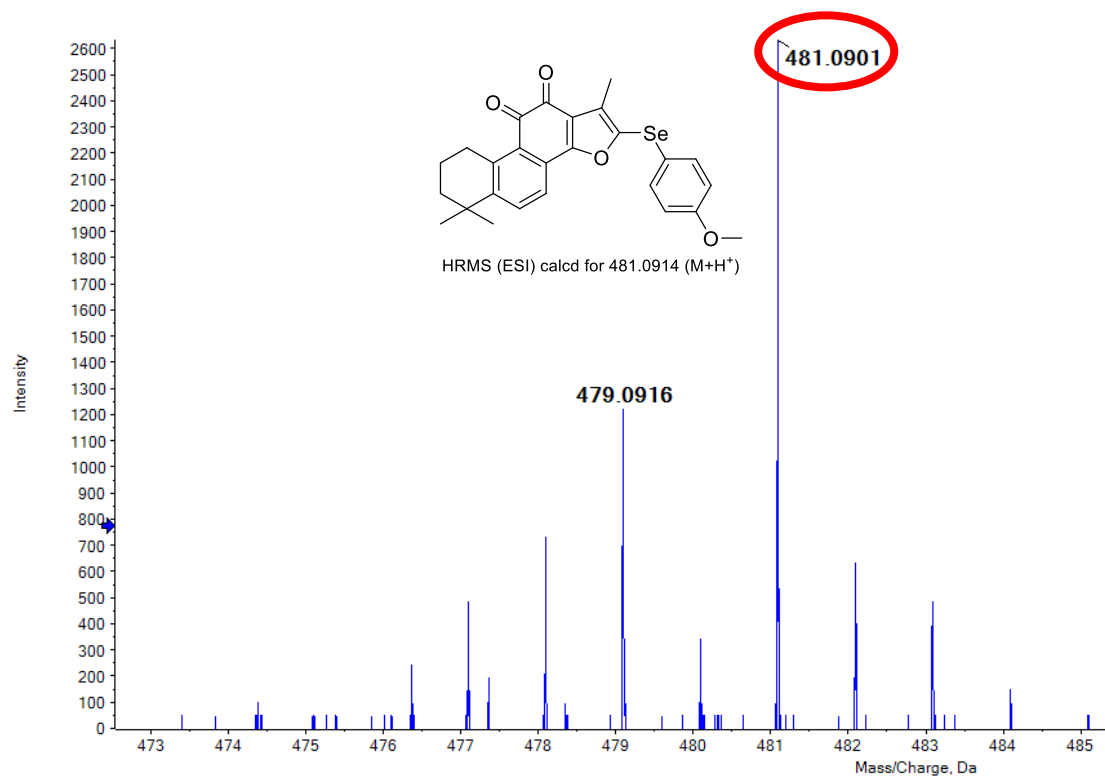

$^1\text{H}$  NMR (400 MHz,  $\text{CDCl}_3$ ) of compound **2g**

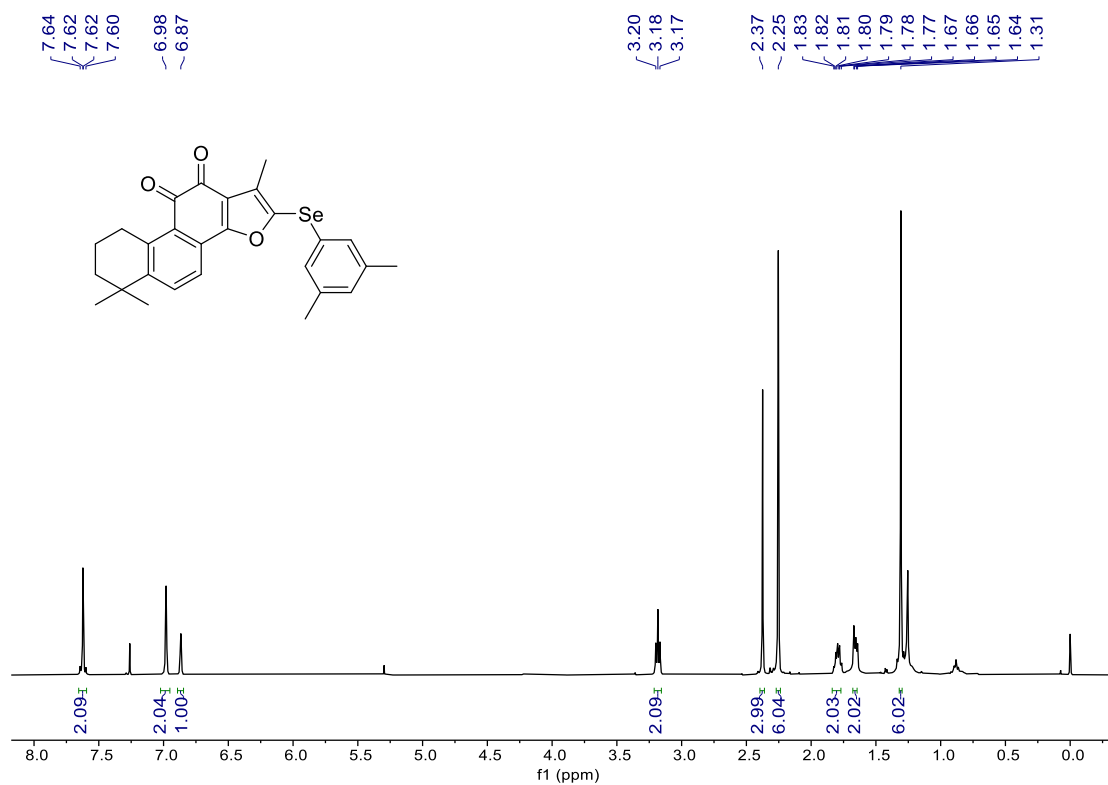

$^{13}\text{C}$  NMR (101 MHz,  $\text{CDCl}_3$ ) of compound **2g**

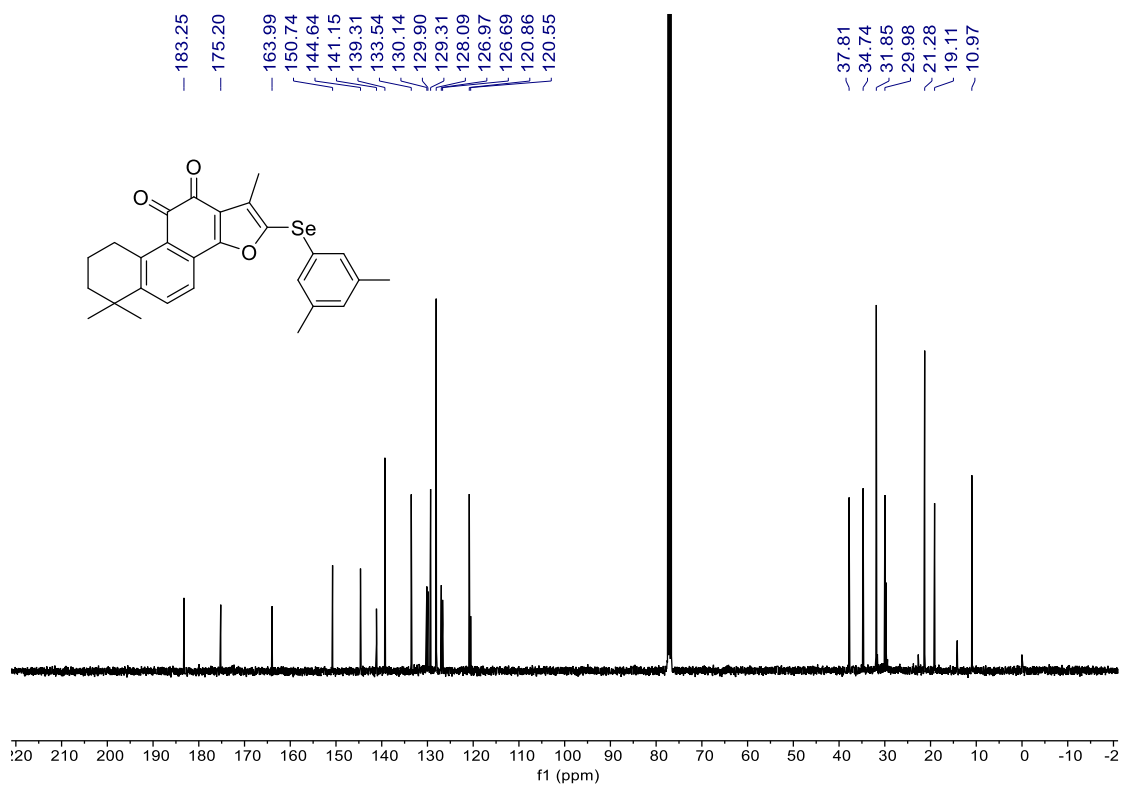

HRMS(ESI) of compound **2g**

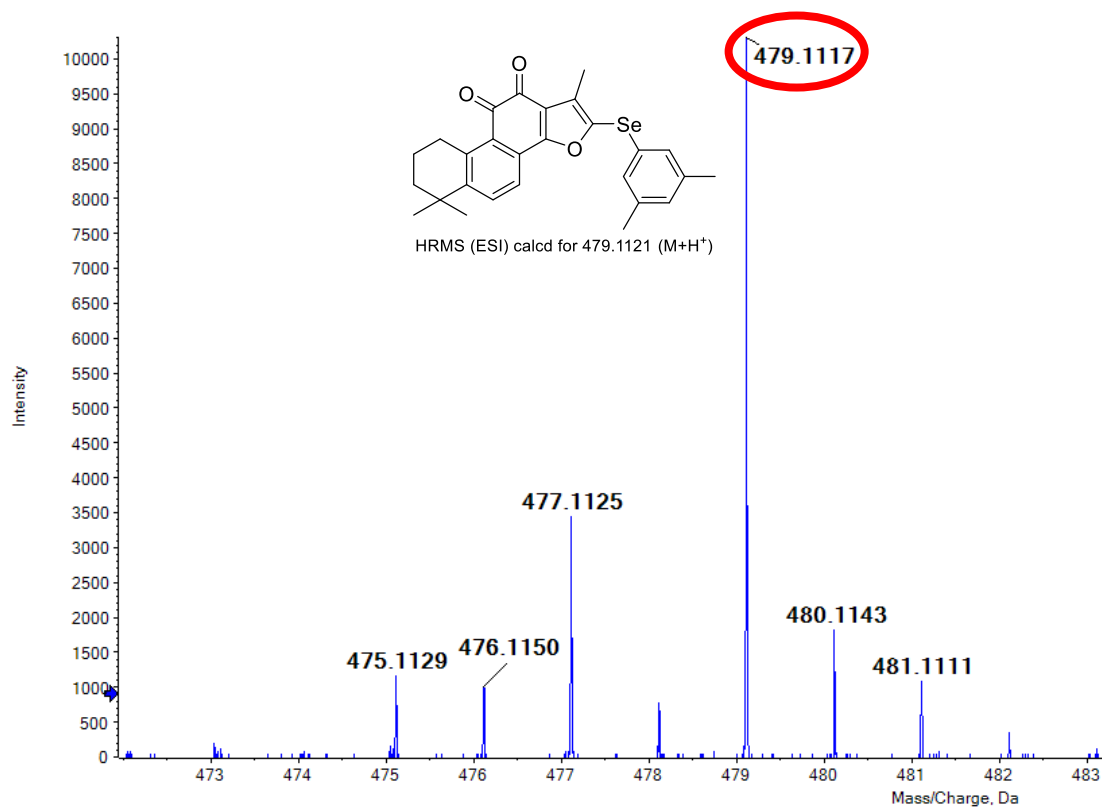

$^1\text{H}$  NMR (400 MHz,  $\text{CDCl}_3$ ) of compound **2h**

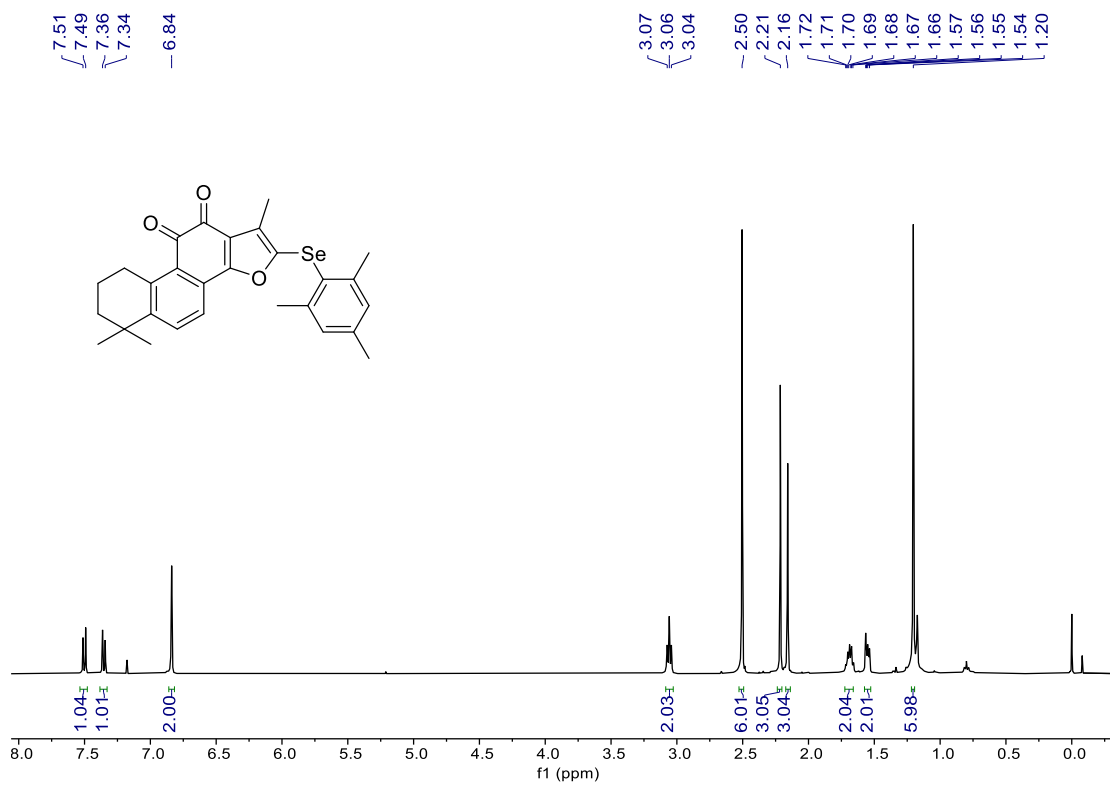

$^{13}\text{C}$  NMR (101 MHz,  $\text{CDCl}_3$ ) of compound **2h**

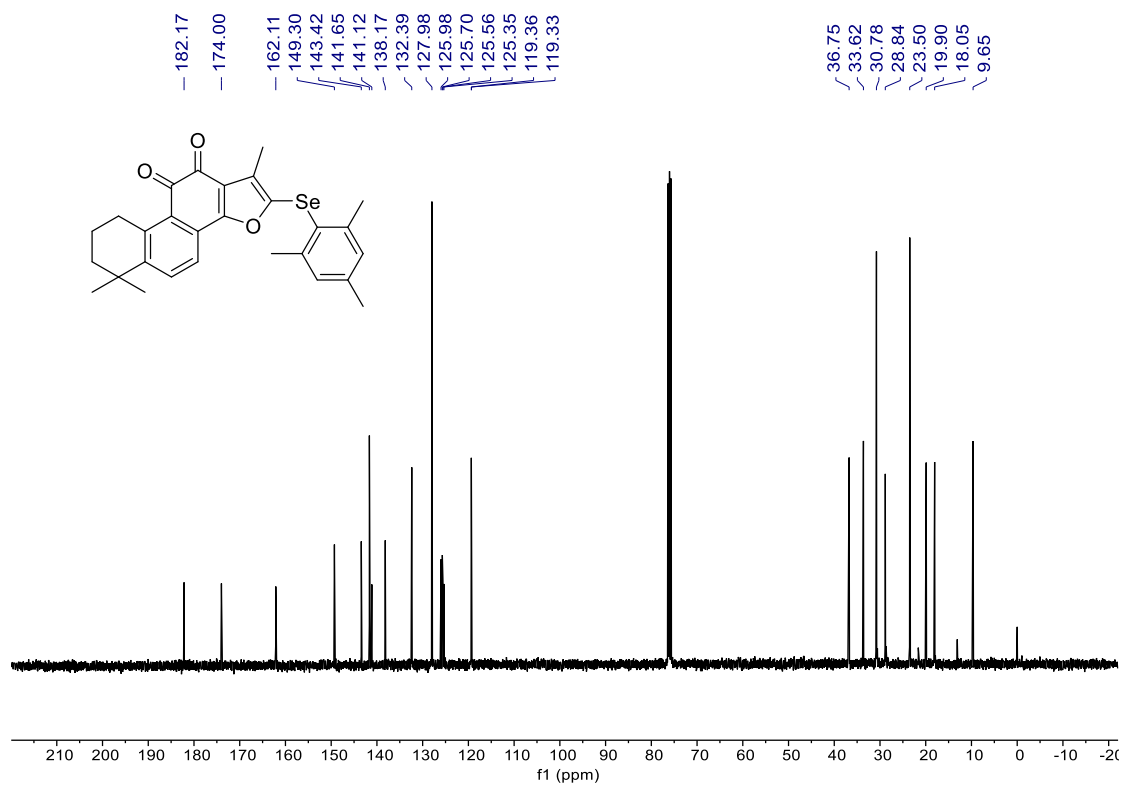

HRMS(ESI) of compound **2h**

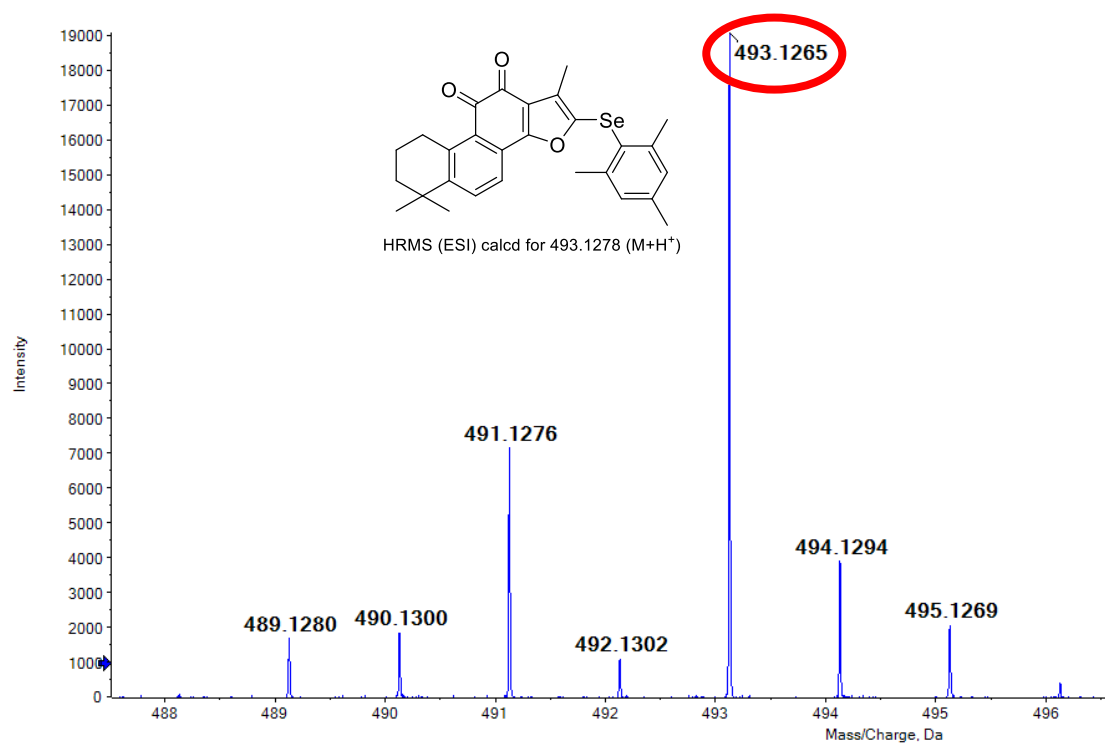



$^1\text{H}$  NMR (400 MHz,  $\text{CDCl}_3$ ) of compound **2i**

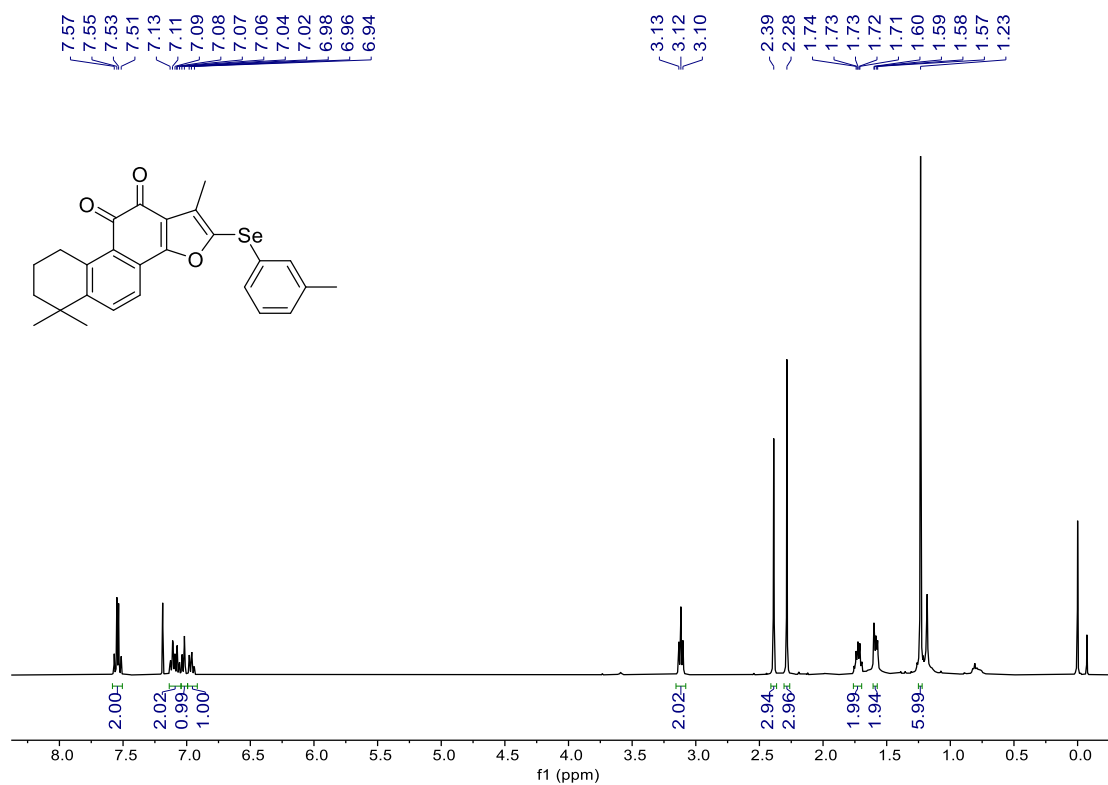

$^{13}\text{C}$  NMR (101 MHz,  $\text{CDCl}_3$ ) of compound **2i**

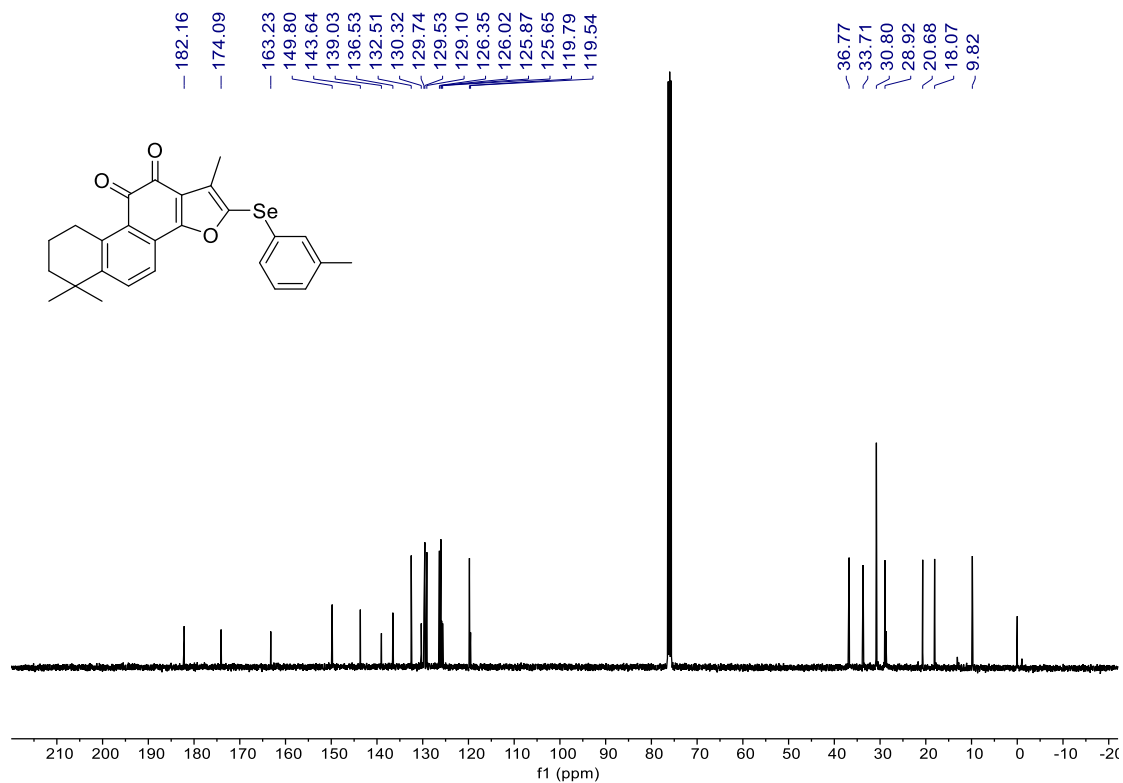

HRMS(ESI) of compound **2i**

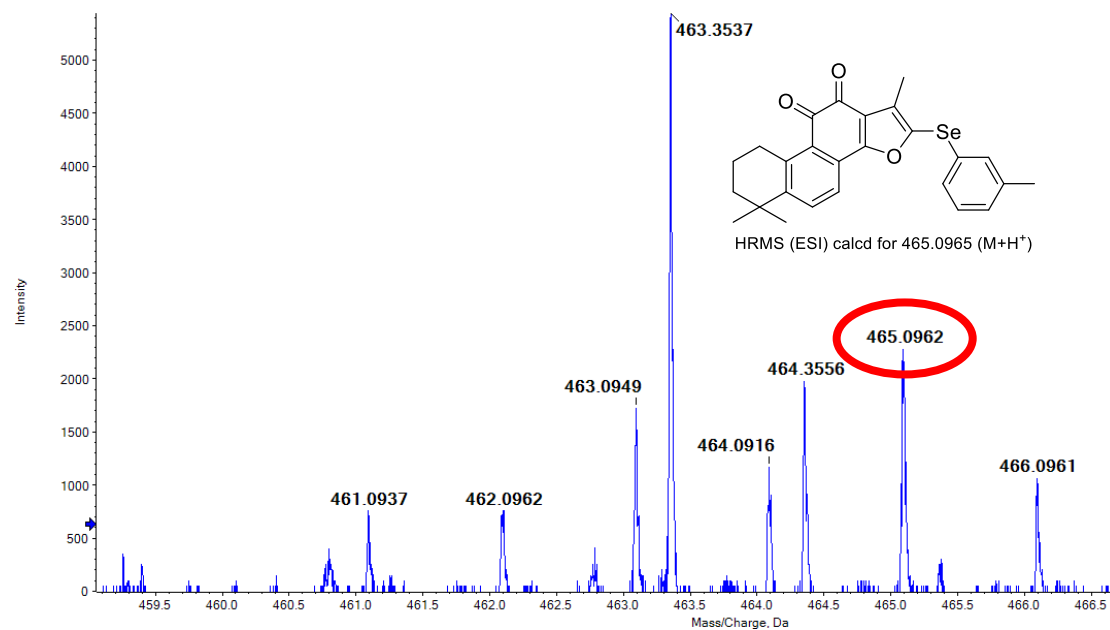

$^1\text{H}$  NMR (400 MHz,  $\text{CDCl}_3$ ) of compound **2j**

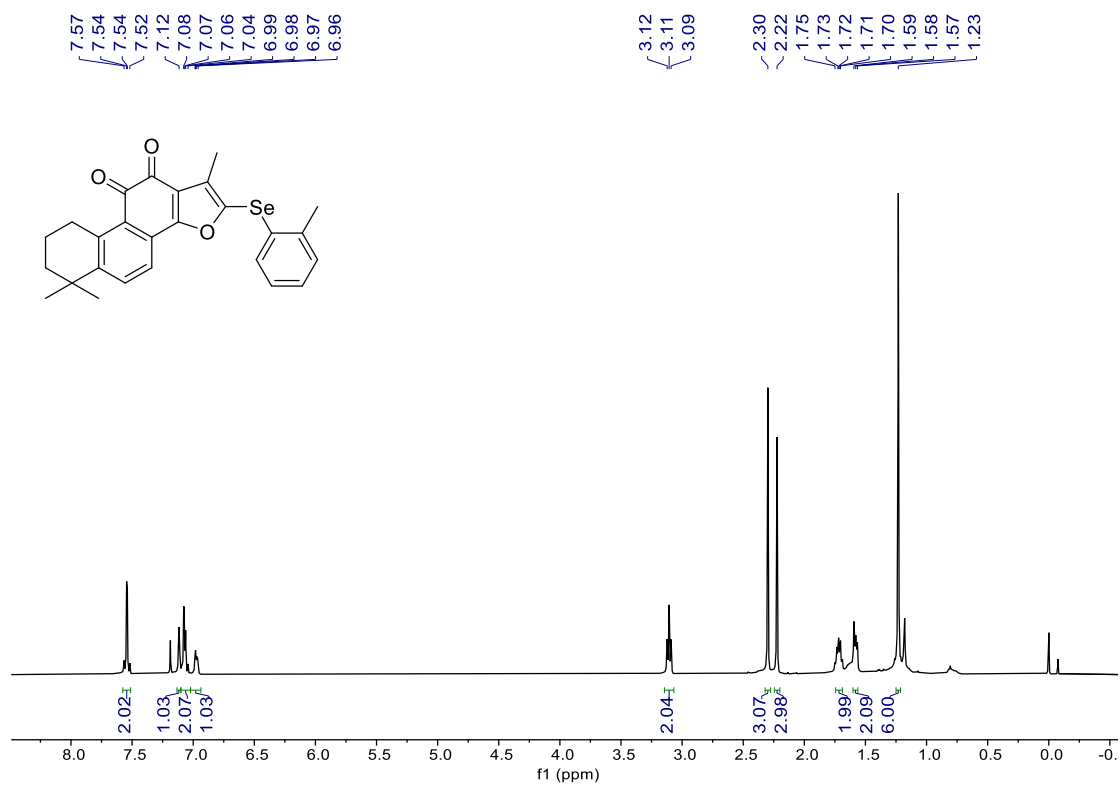

$^{13}\text{C}$  NMR (101 MHz,  $\text{CDCl}_3$ ) of compound **2j**

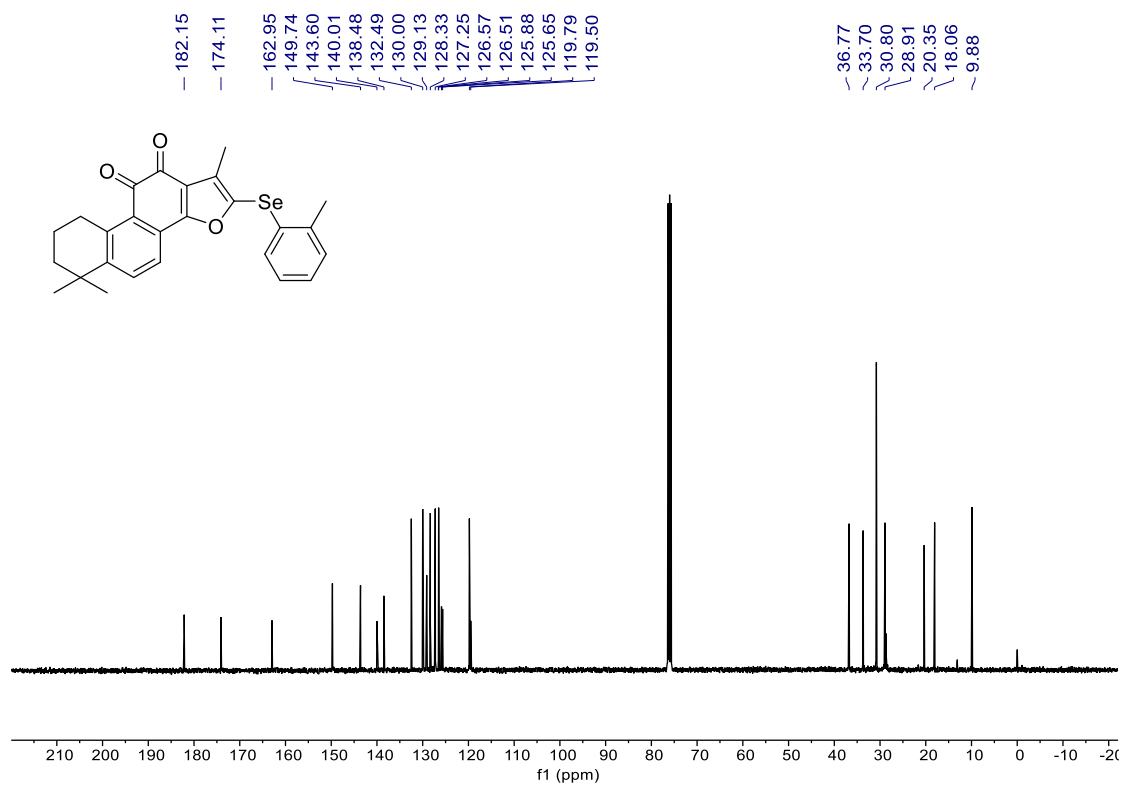

HRMS(ESI) of compound **2j**

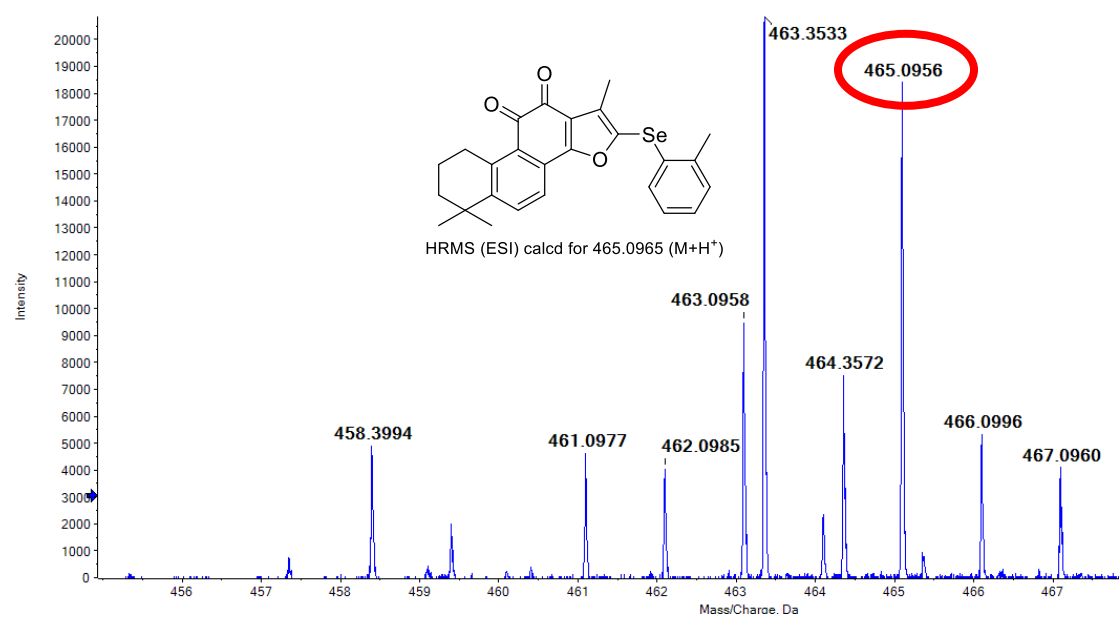

$^1\text{H}$  NMR (400 MHz,  $\text{CDCl}_3$ ) of compound **2k**

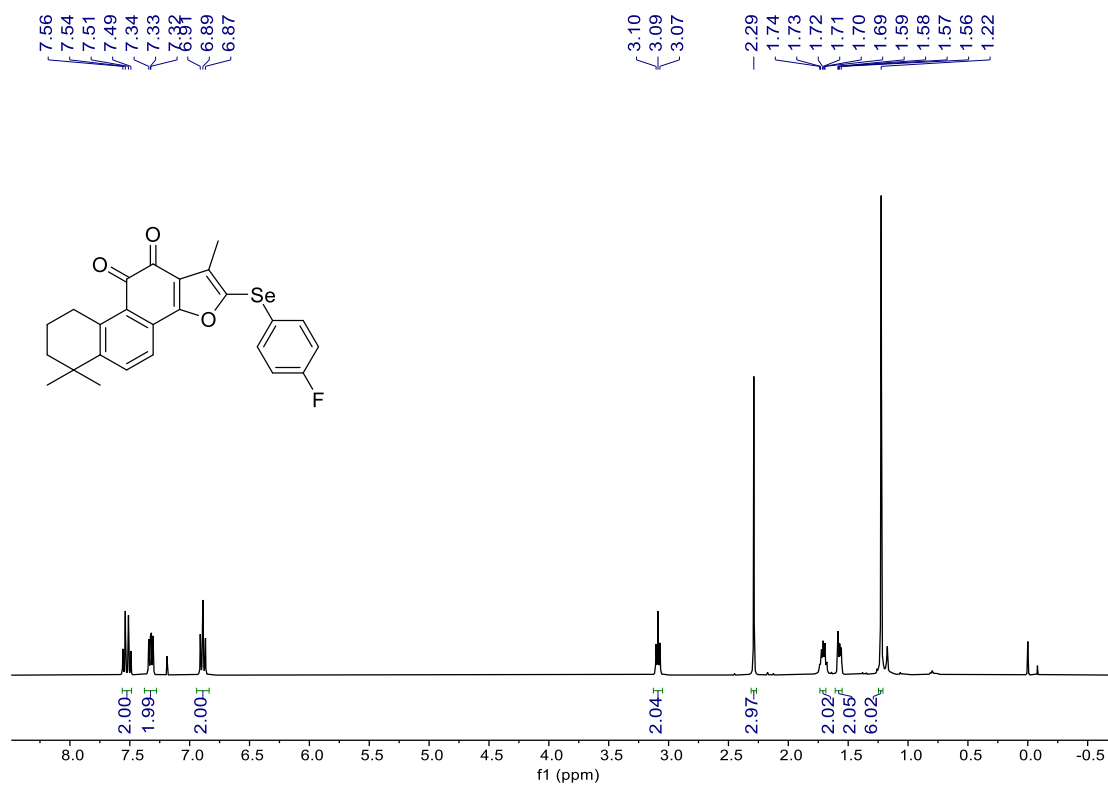

$^{13}\text{C}$  NMR (101 MHz,  $\text{CDCl}_3$ ) of compound **2k**

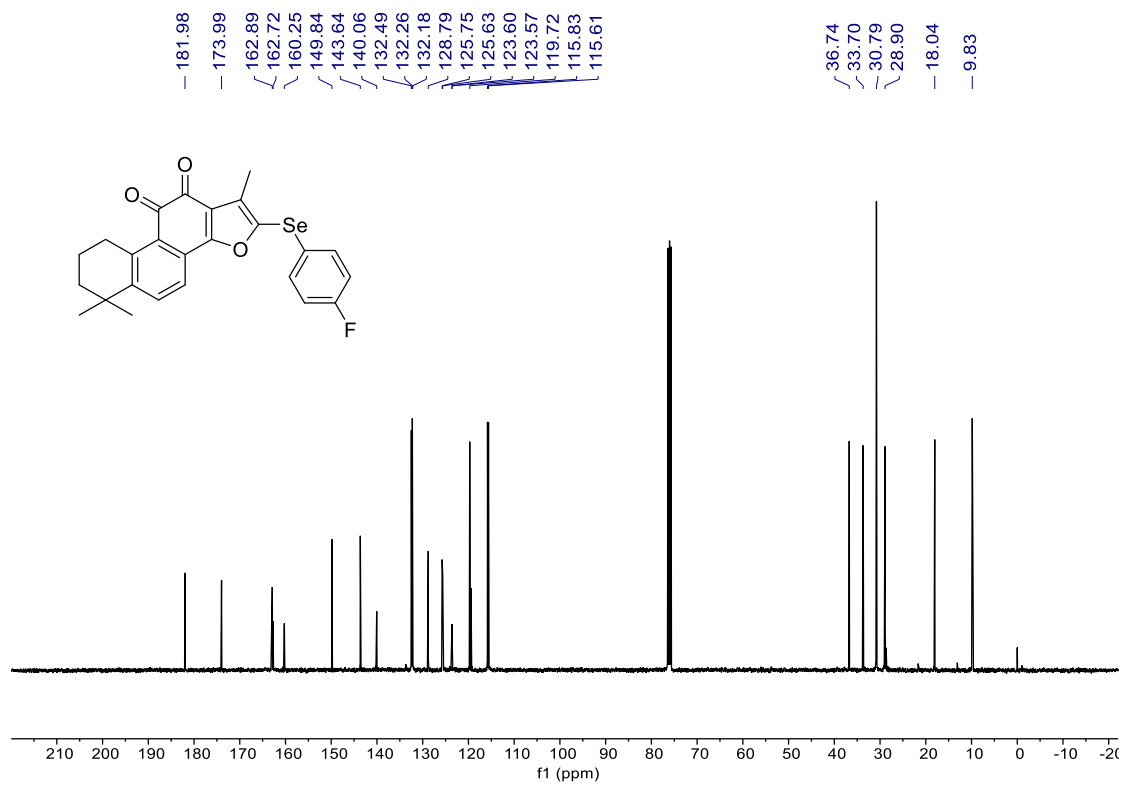

$^{19}\text{F}$  NMR (376 MHz,  $\text{CDCl}_3$ ) of compound **2k**

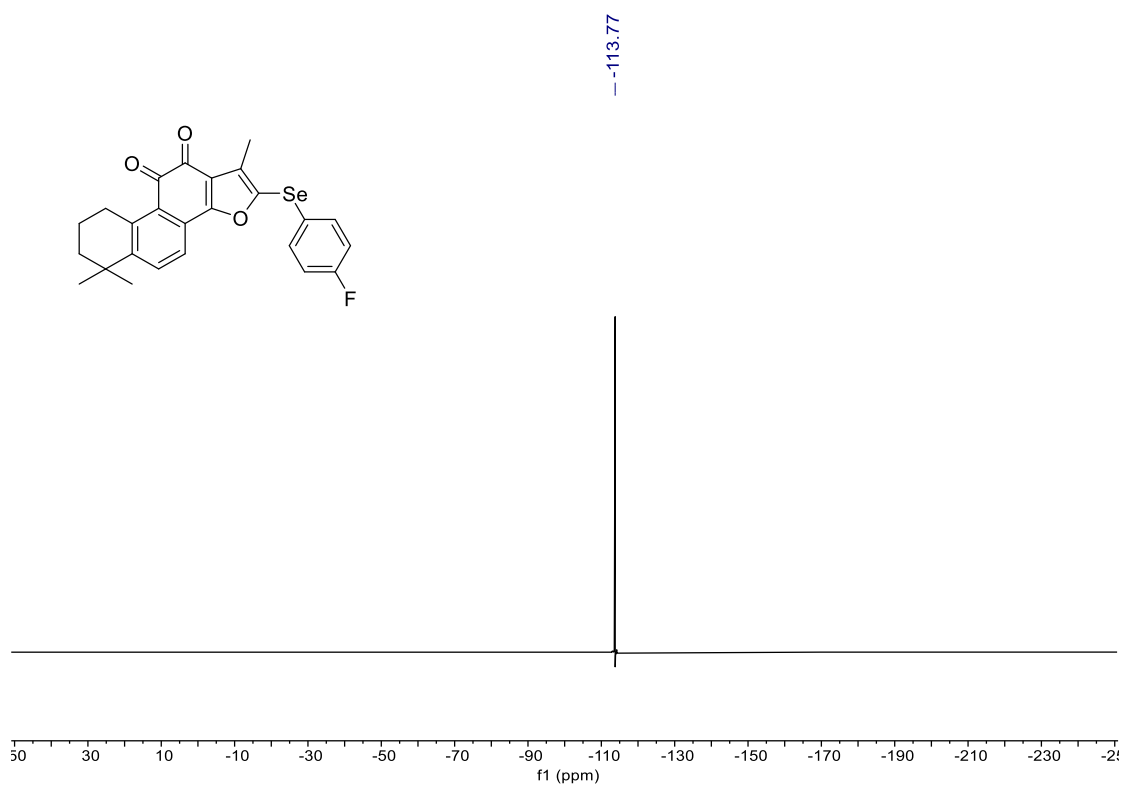

HRMS(ESI) of compound **2k**

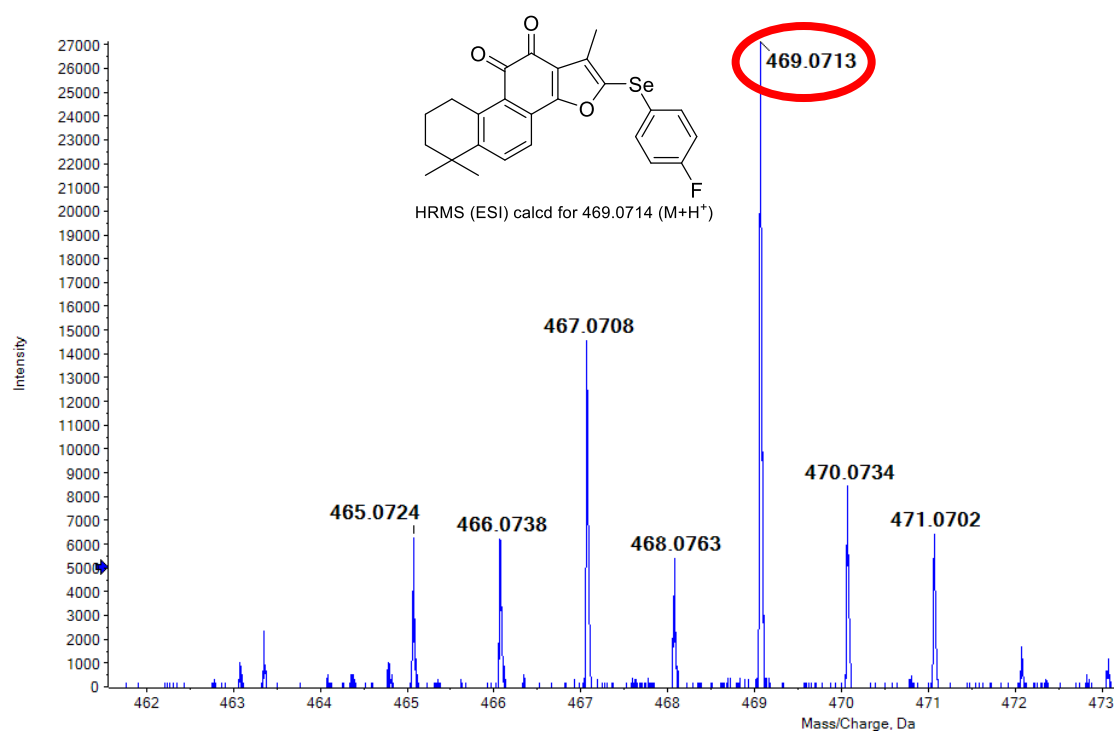

$^1\text{H}$  NMR (400 MHz,  $\text{CDCl}_3$ ) of compound **21**

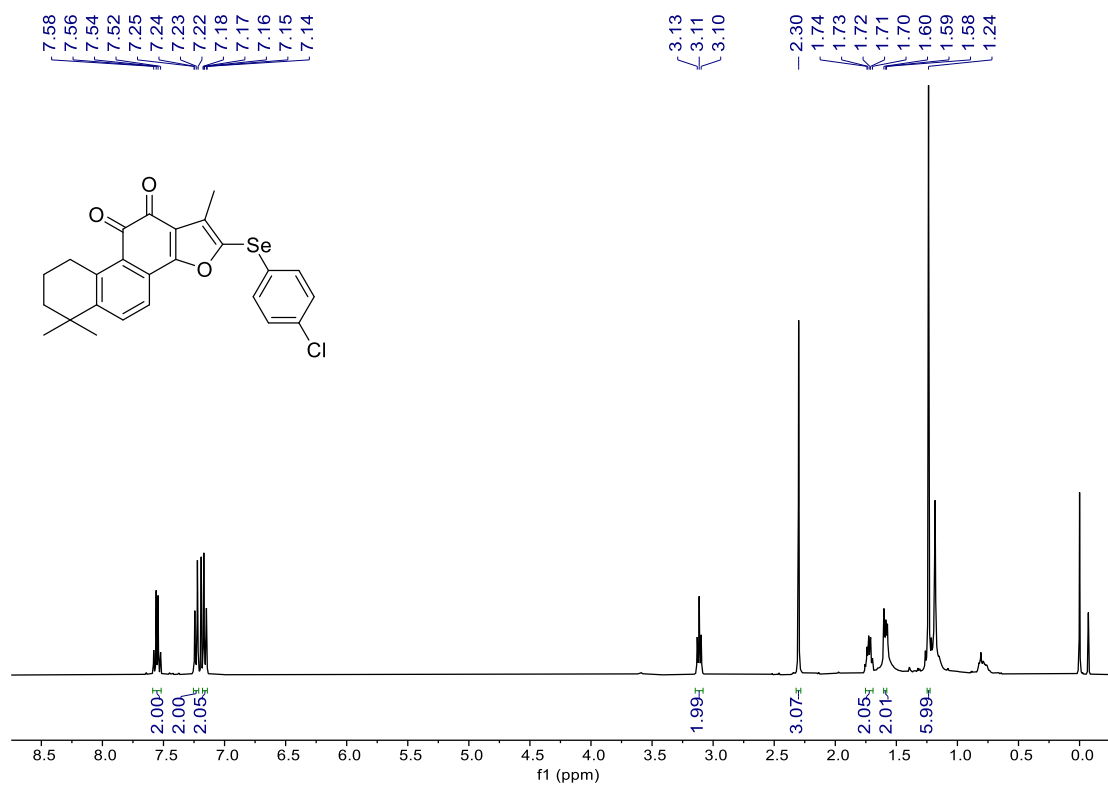

$^{13}\text{C}$  NMR (101 MHz,  $\text{CDCl}_3$ ) of compound **21**

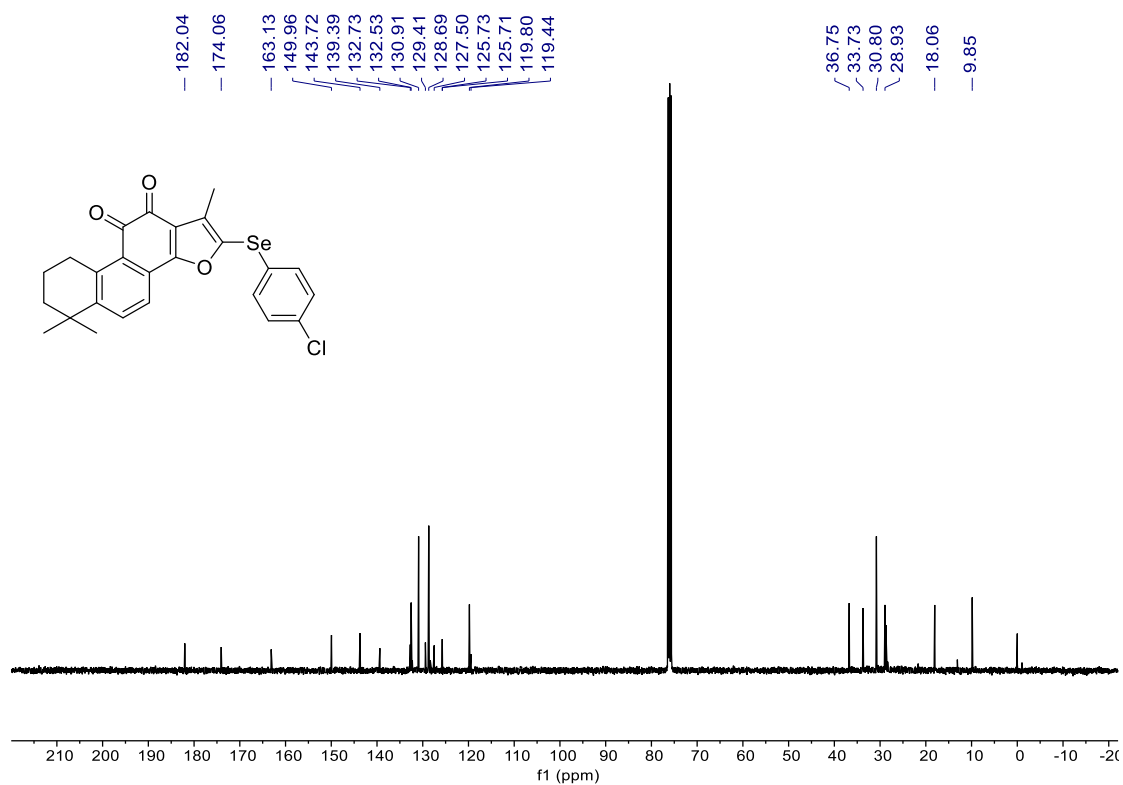

HRMS(ESI) of compound **2l**

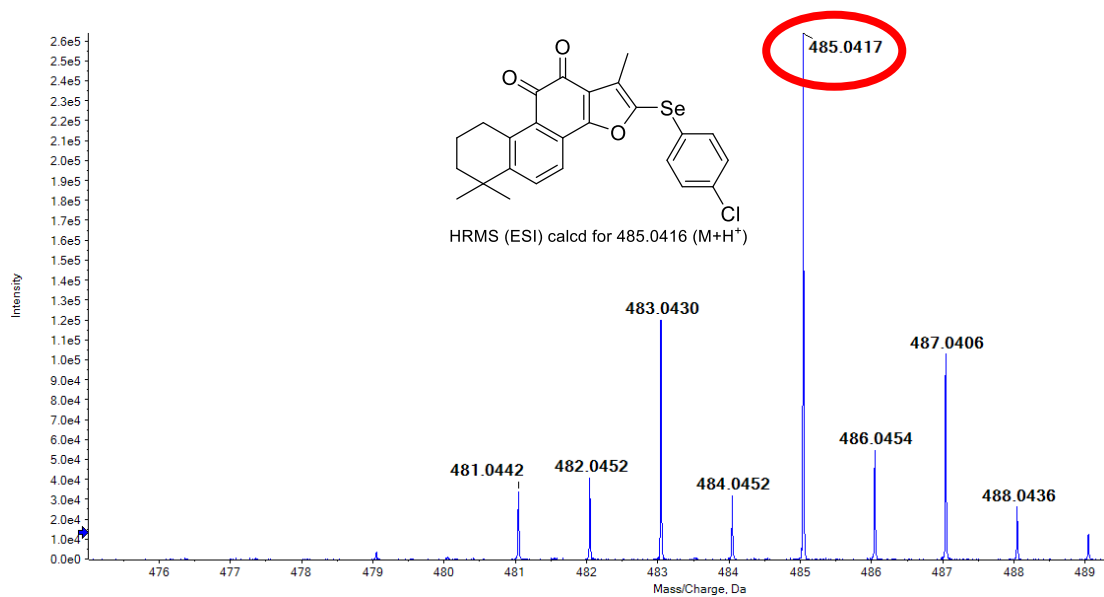

$^1H$  NMR (400 MHz,  $CDCl_3$ ) of compound **2m**

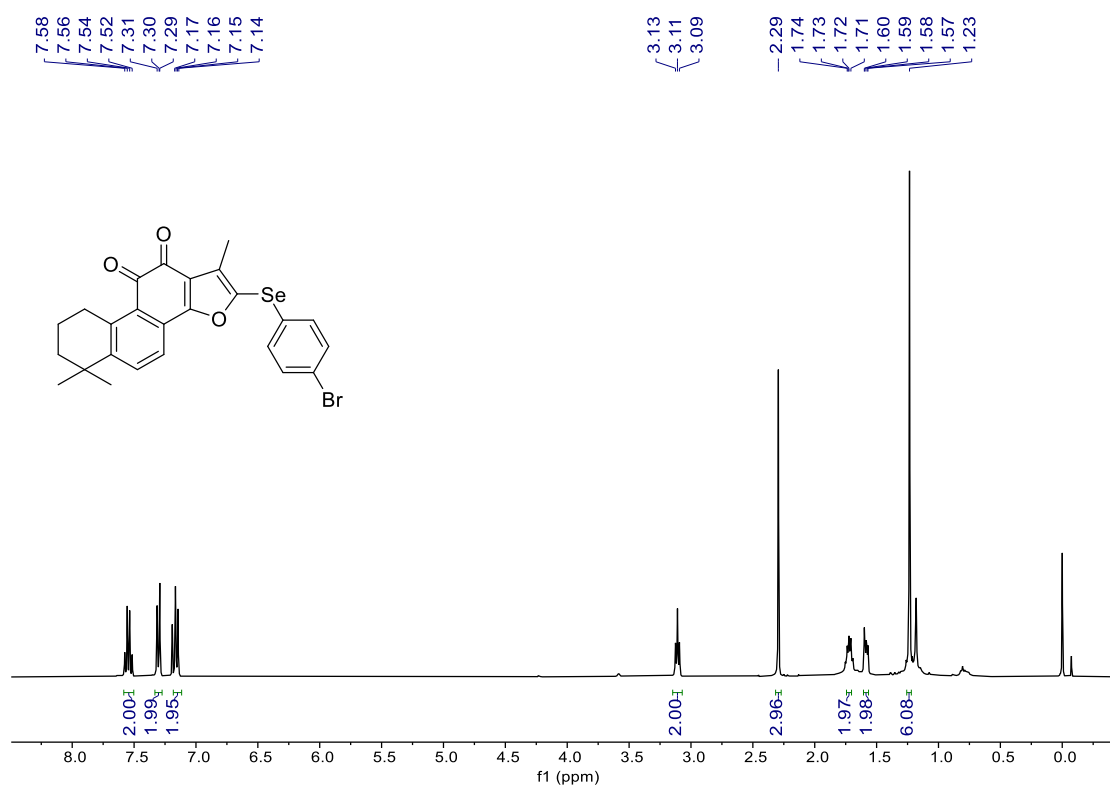

$^{13}\text{C}$  NMR (101 MHz,  $\text{CDCl}_3$ ) of compound **2m**

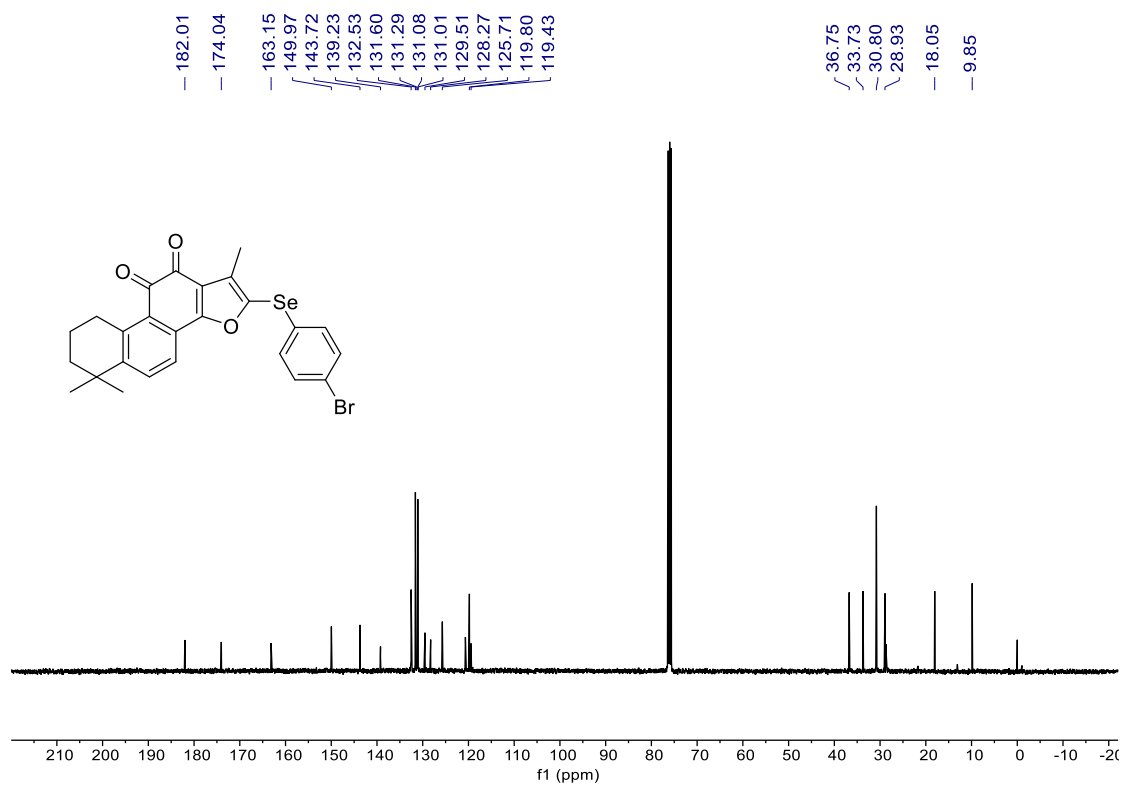

HRMS(ESI) of compound **2m**

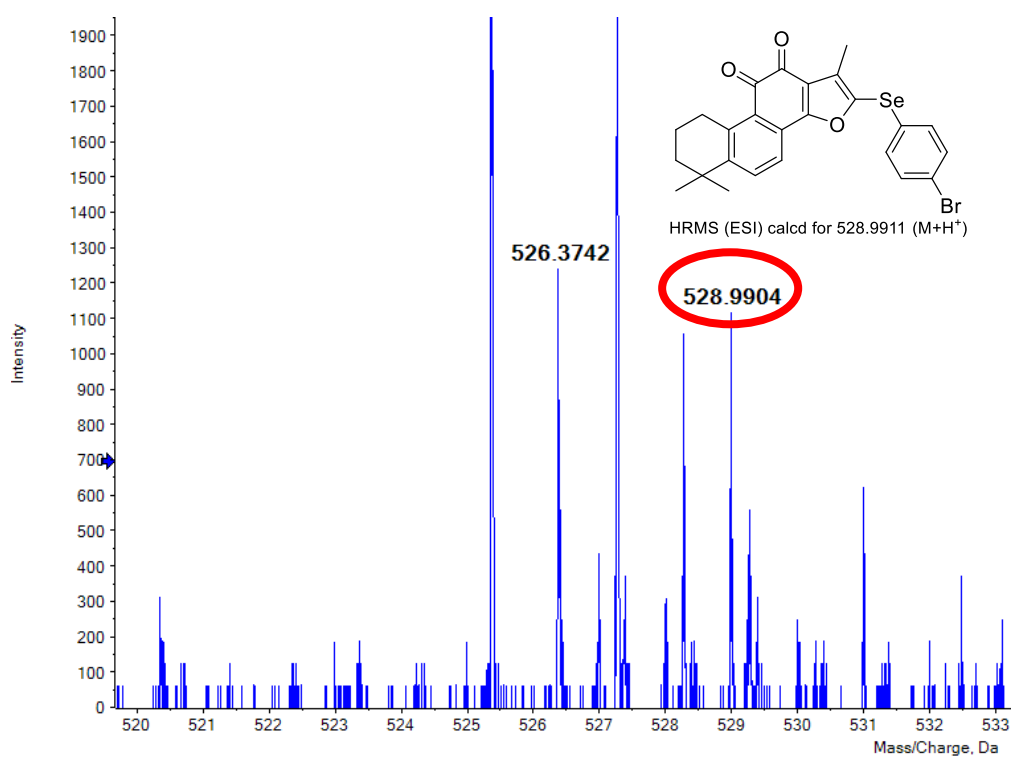



$^1\text{H}$  NMR (400 MHz,  $\text{CDCl}_3$ ) of compound **2n**

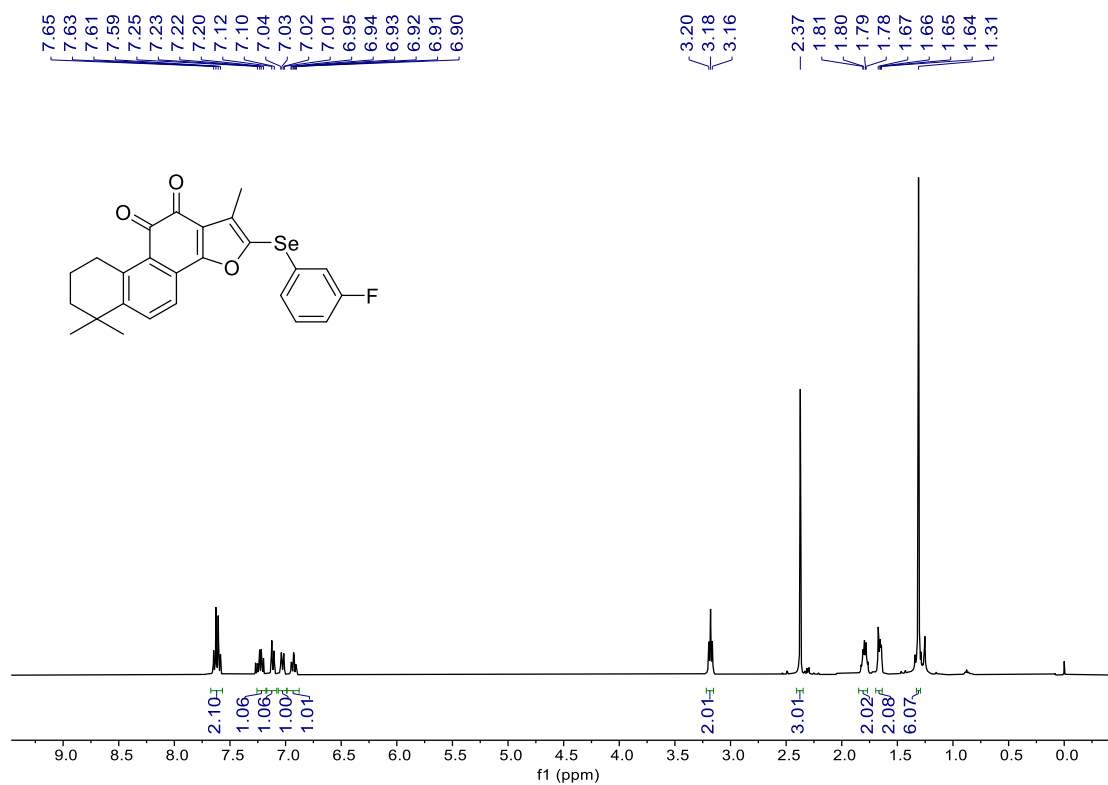

$^{13}\text{C}$  NMR (101 MHz,  $\text{CDCl}_3$ ) of compound **2n**

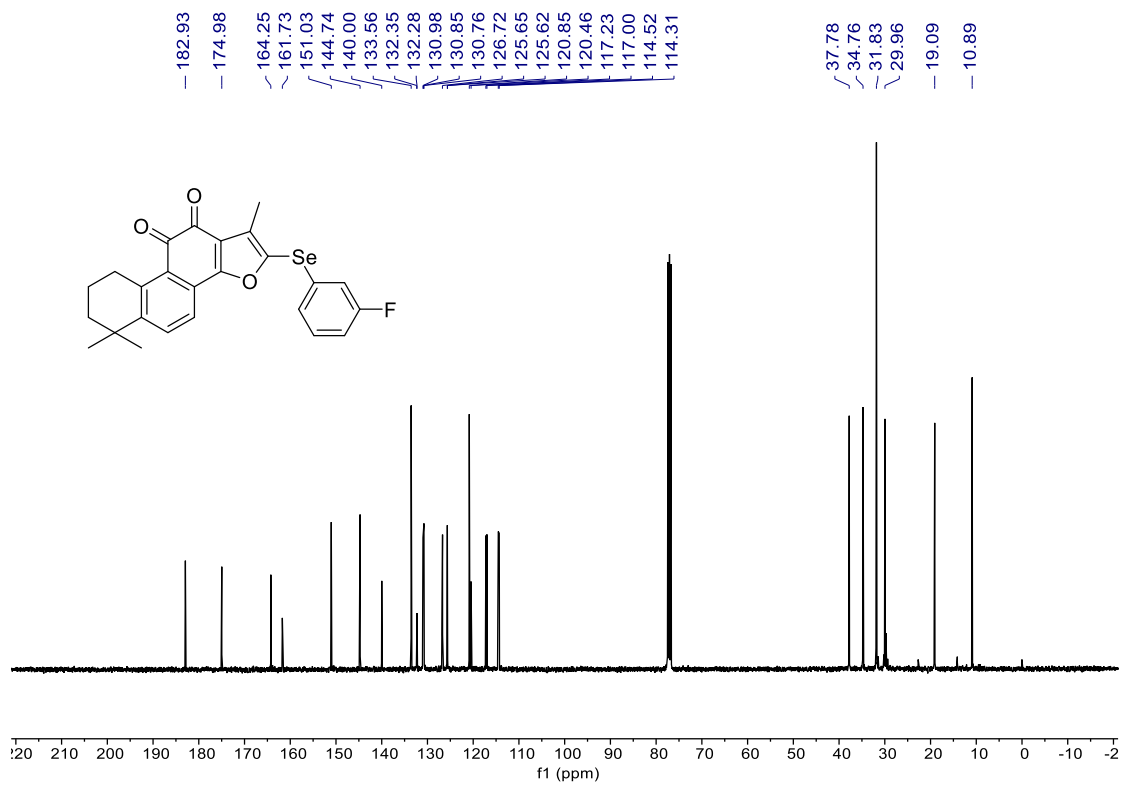

Chemical structure of the compound is shown above the spectrum. The structure is a complex molecule featuring a central benzene ring substituted with a cyclohexyl group, a carbonyl group, and a furan ring. The furan ring is further substituted with a methyl group and a phenyl group. The phenyl group is substituted with a fluorine atom.

The spectrum shows a single sharp peak at approximately 110.8 ppm, labeled as  $\delta$  110.80. The x-axis is labeled "f1 (ppm)" and ranges from 50 to -250 ppm.

Chemical structure of compound 10 is shown above the mass spectrum. The structure is a complex polycyclic molecule featuring a benzene ring fused to a cyclohexane ring, which is further fused to a pyrone ring. A selenophene ring is attached to the pyrone ring, and a fluorophenyl group is attached to the selenophene ring.

Mass spectrum data (m/z vs. Intensity):

| m/z      | Relative Intensity (%) |
|----------|------------------------|
| 465.0624 | ~550                   |
| 467.0668 | ~1150                  |
| 469.0710 | 100 (Base Peak)        |
| 470.0747 | ~550                   |

$^1\text{H}$  NMR (400 MHz,  $\text{CDCl}_3$ ) of compound **2o**

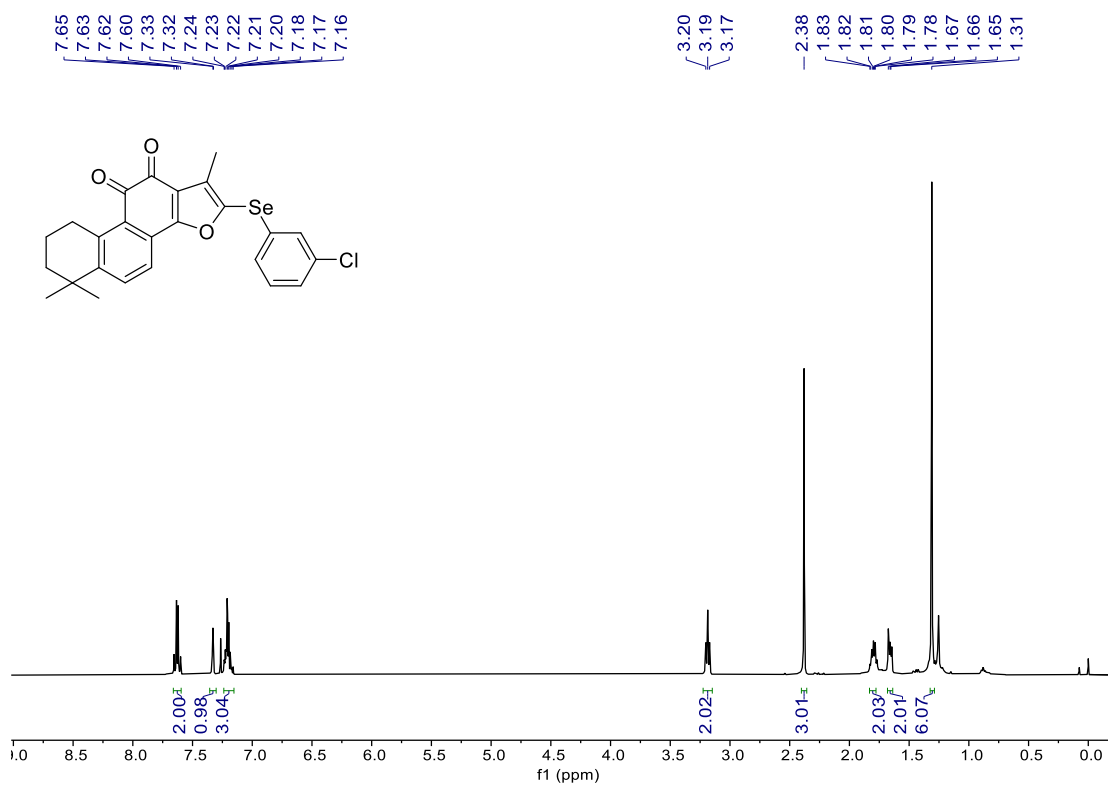

$^{13}\text{C}$  NMR (101 MHz,  $\text{CDCl}_3$ ) of compound **2o**

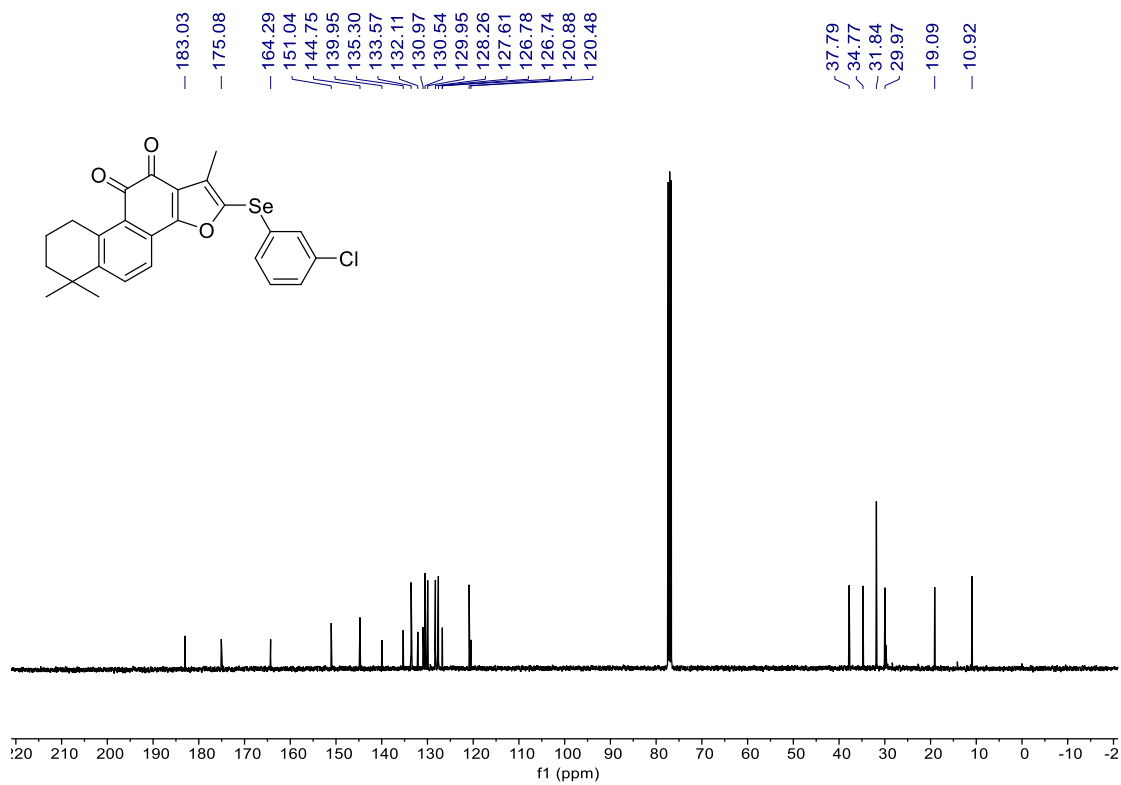

HRMS(ESI) of compound **2o**

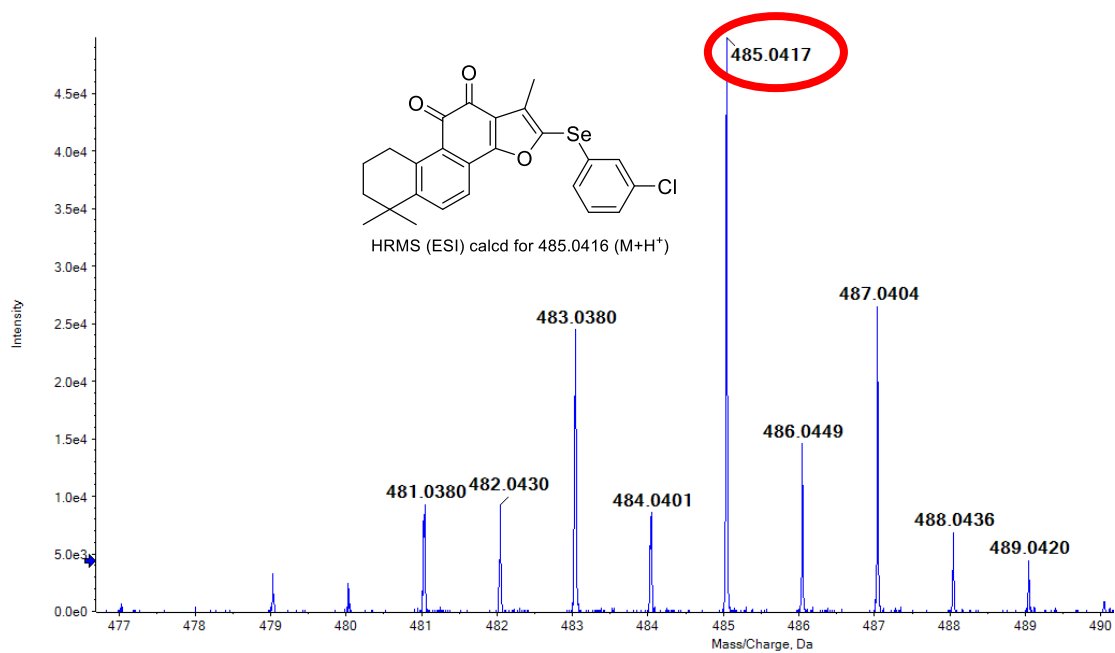

$^1\text{H}$  NMR (400 MHz,  $\text{CDCl}_3$ ) of compound **2p**

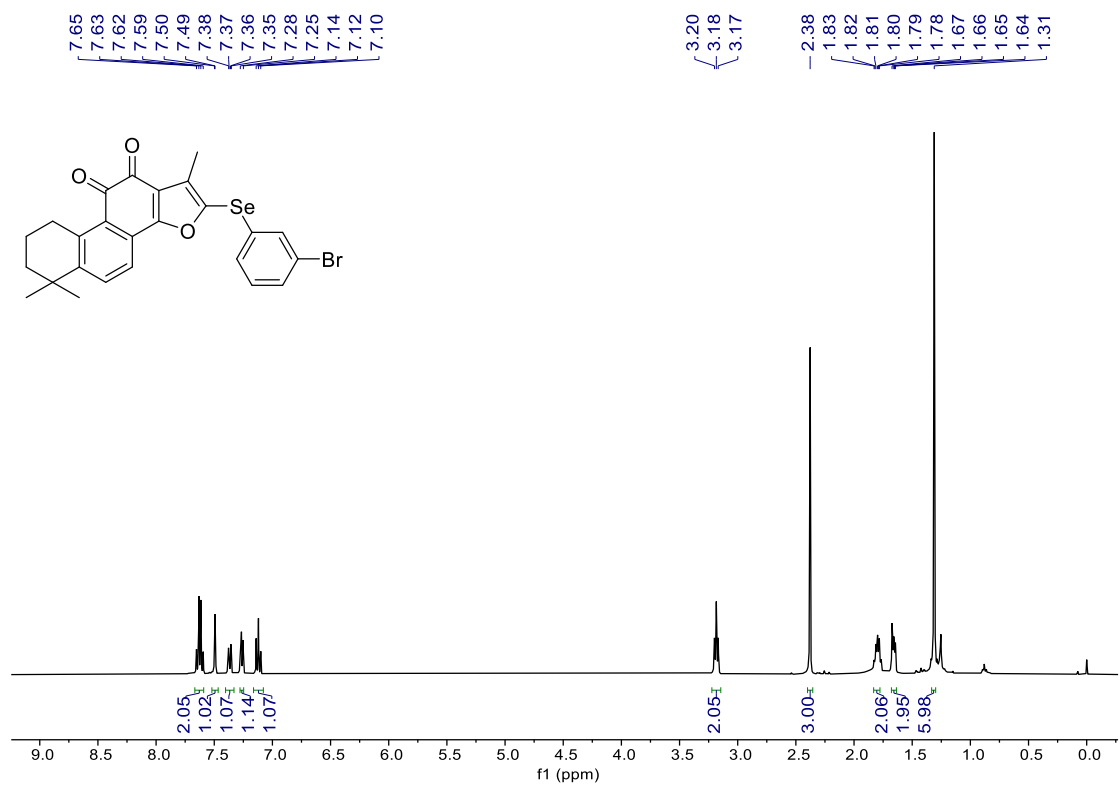

$^{13}\text{C}$  NMR (101 MHz,  $\text{CDCl}_3$ ) of compound **2p**

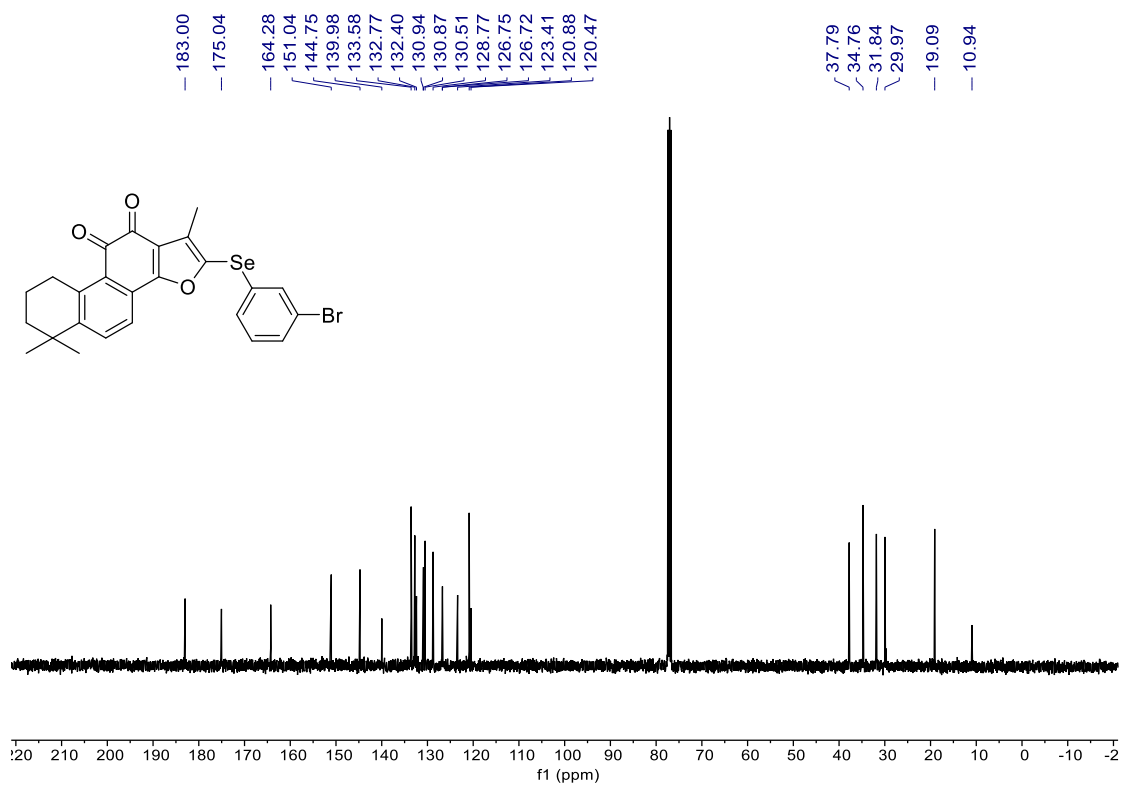

HRMS(ESI) of compound **2p**

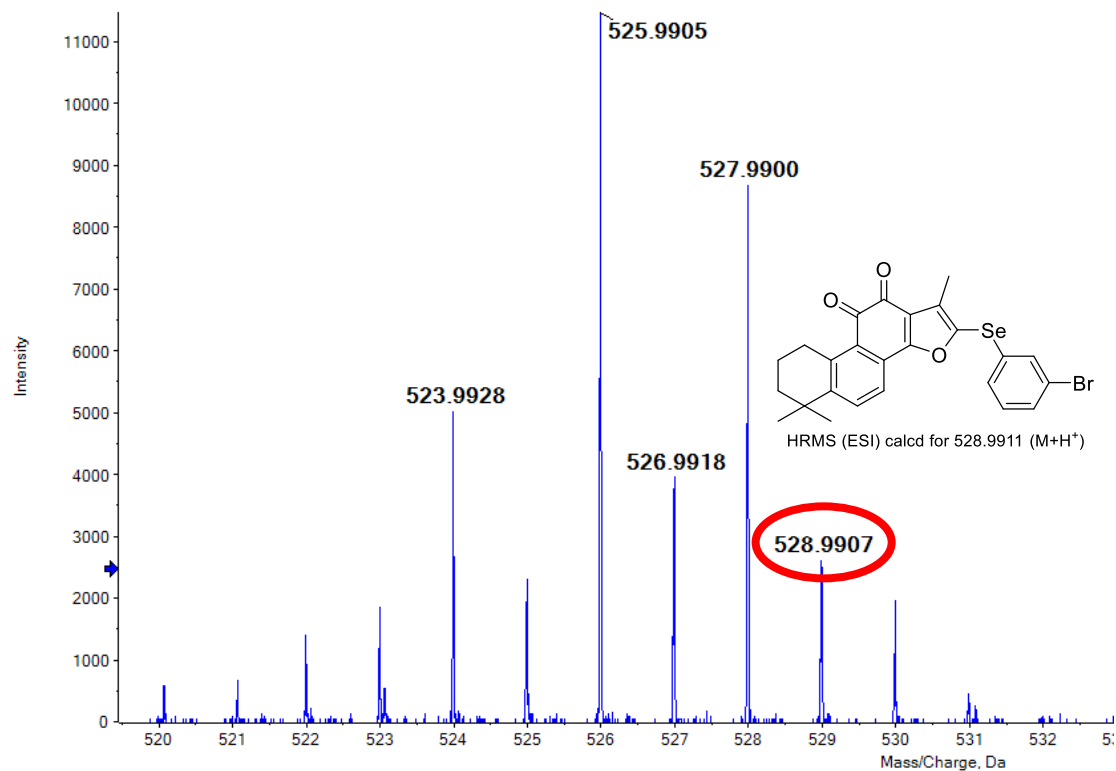

$^1\text{H}$  NMR (400 MHz,  $\text{CDCl}_3$ ) of compound **2q**

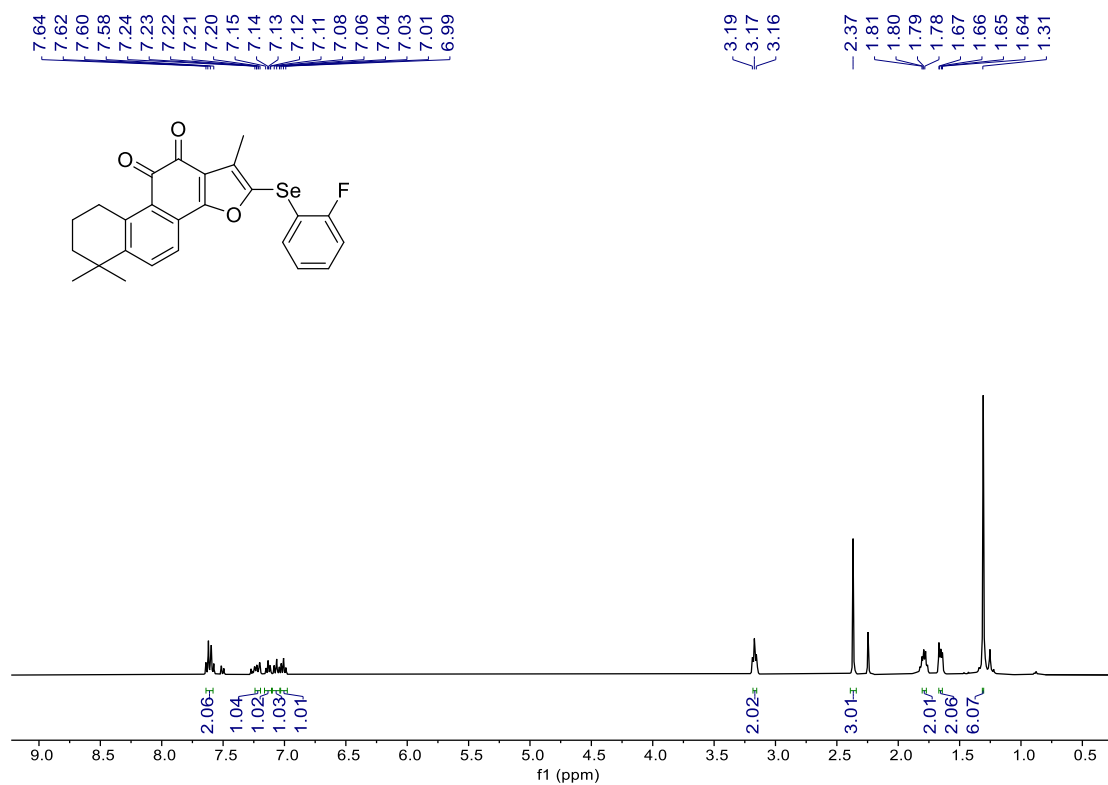

$^{13}\text{C}$  NMR (101 MHz,  $\text{CDCl}_3$ ) of compound **2q**

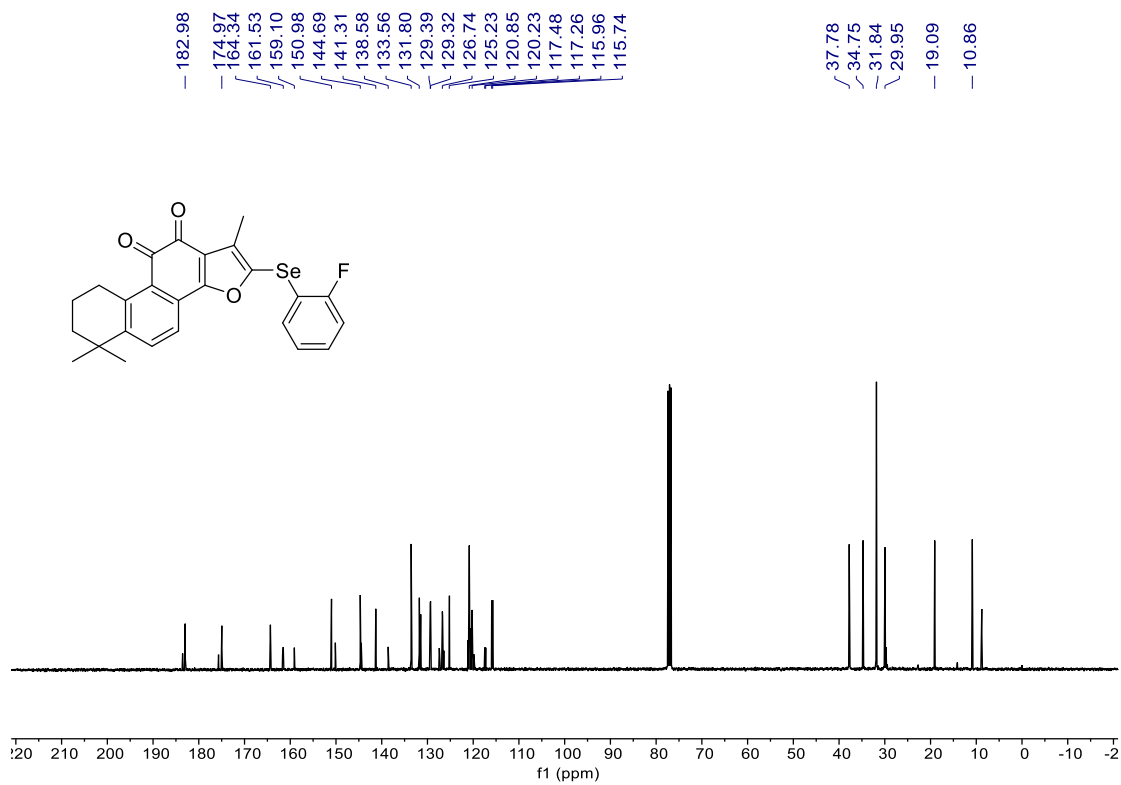

$^{19}\text{F}$  NMR (376 MHz,  $\text{CDCl}_3$ ) of compound **2q**

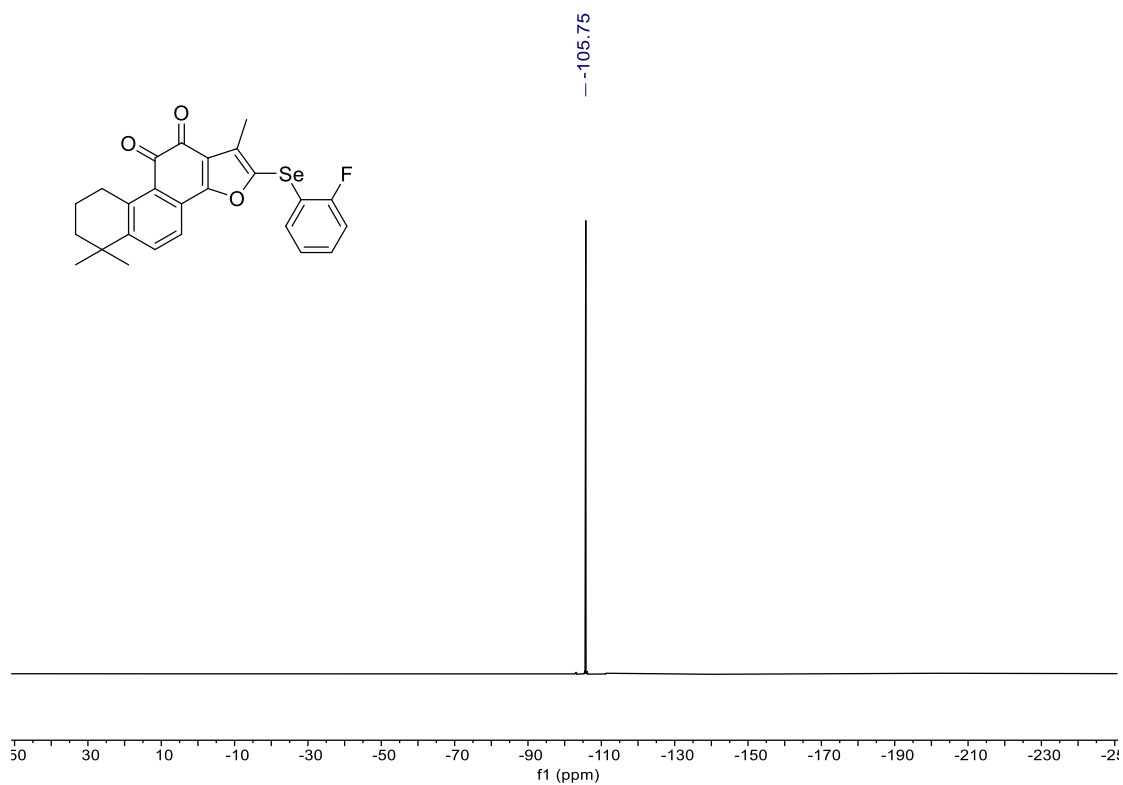

HRMS(ESI) of compound **2q**

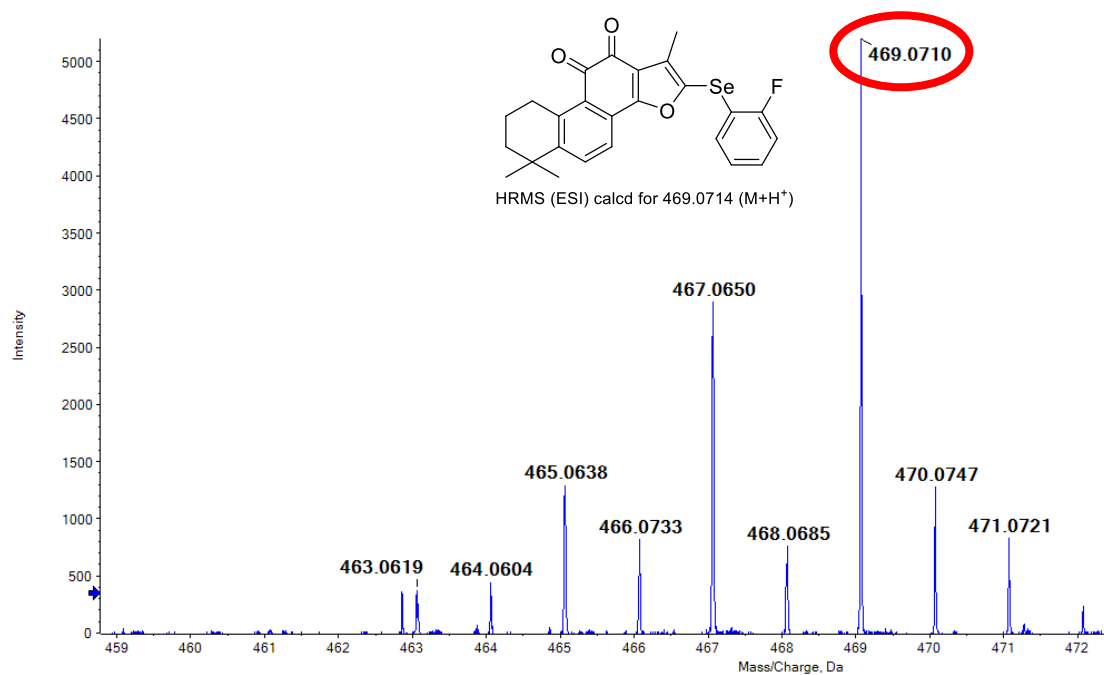

$^1\text{H}$  NMR (400 MHz,  $\text{CDCl}_3$ ) of compound **2r**

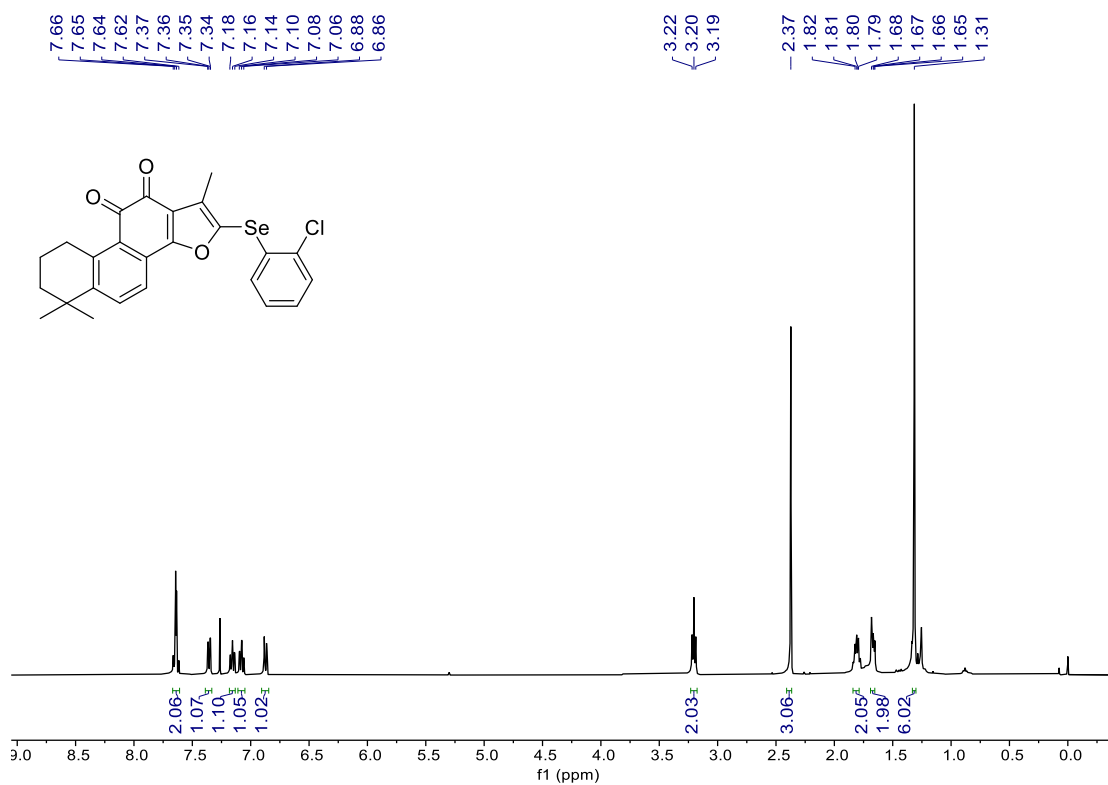

$^{13}\text{C}$  NMR (101 MHz,  $\text{CDCl}_3$ ) of compound **2r**

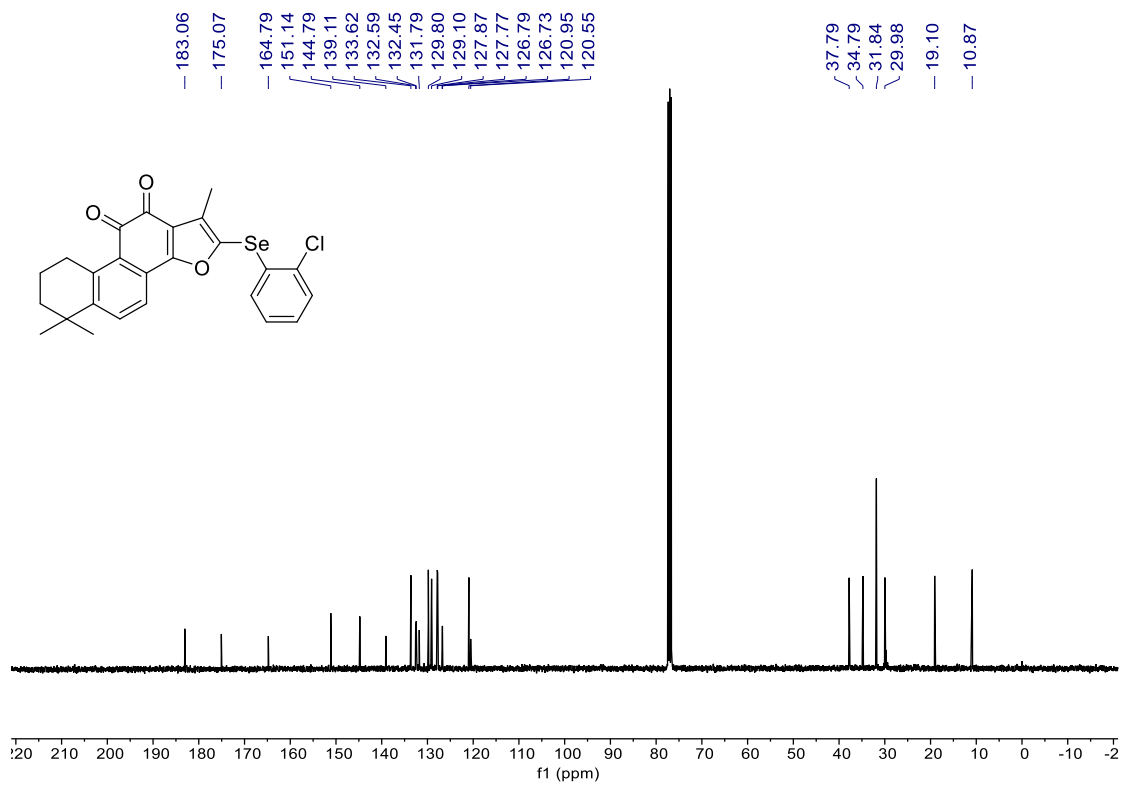



HRMS(ESI) of compound **2r**

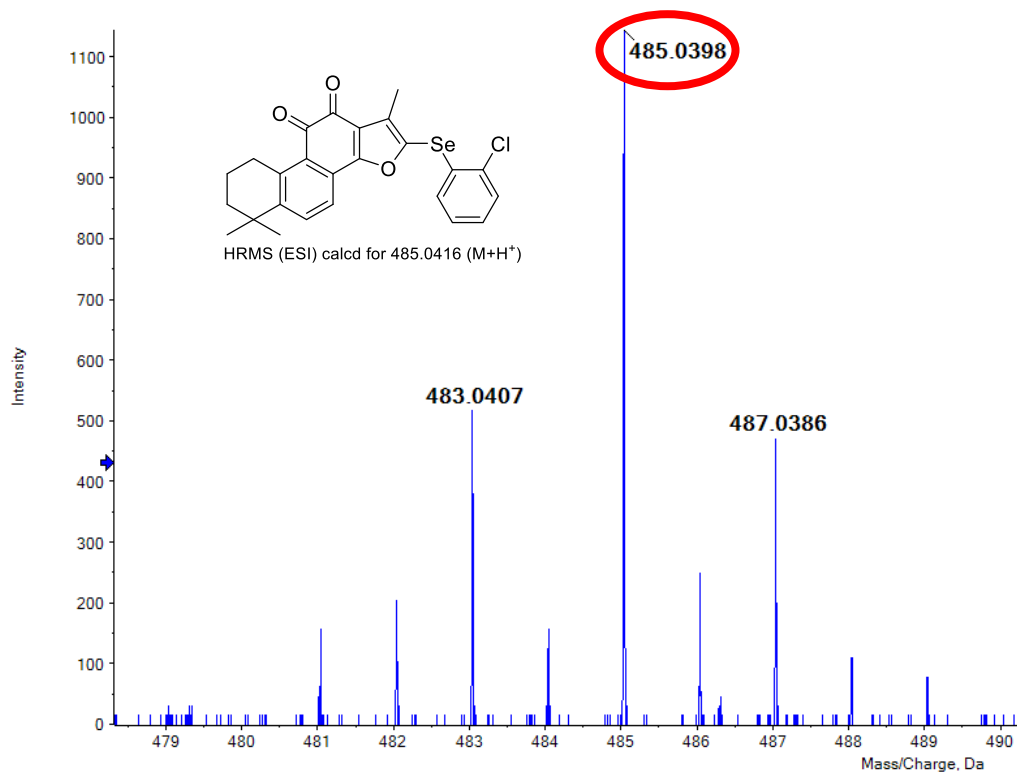

$^1\text{H}$  NMR (400 MHz,  $\text{CDCl}_3$ ) of compound **2s**

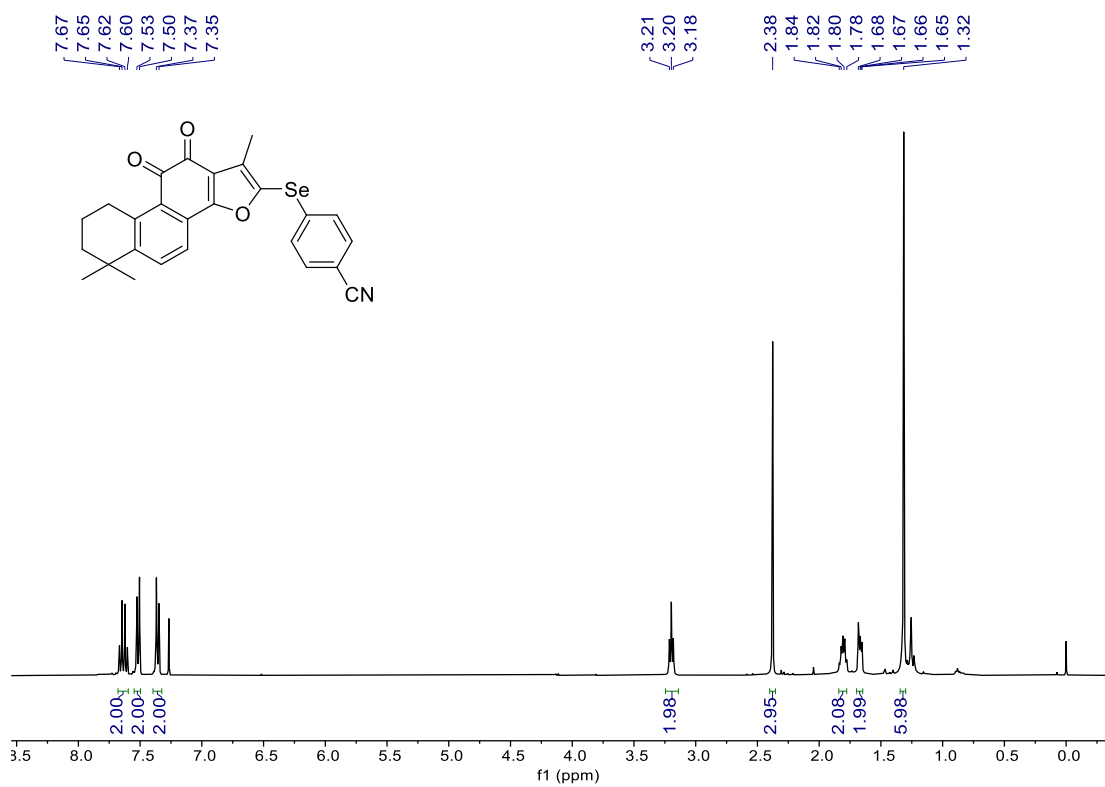

$^{13}\text{C}$  NMR (101 MHz,  $\text{CDCl}_3$ ) of compound **2s**

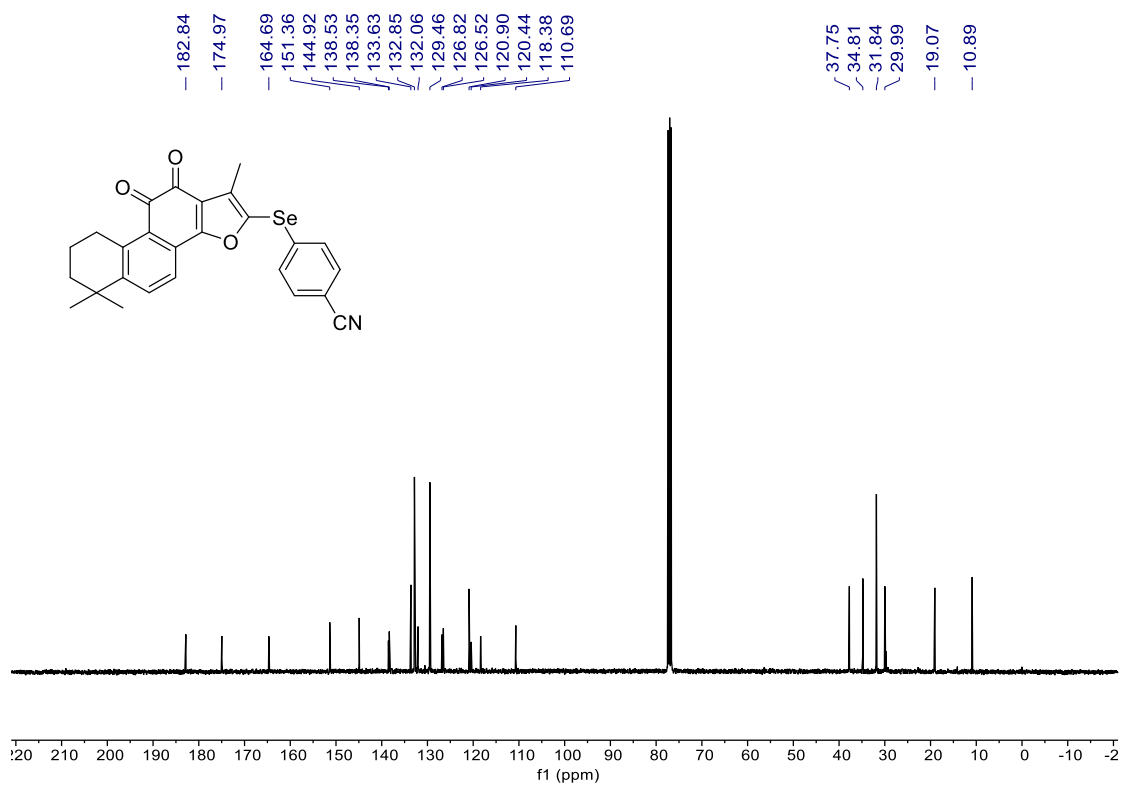

HRMS(ESI) of compound **2s**

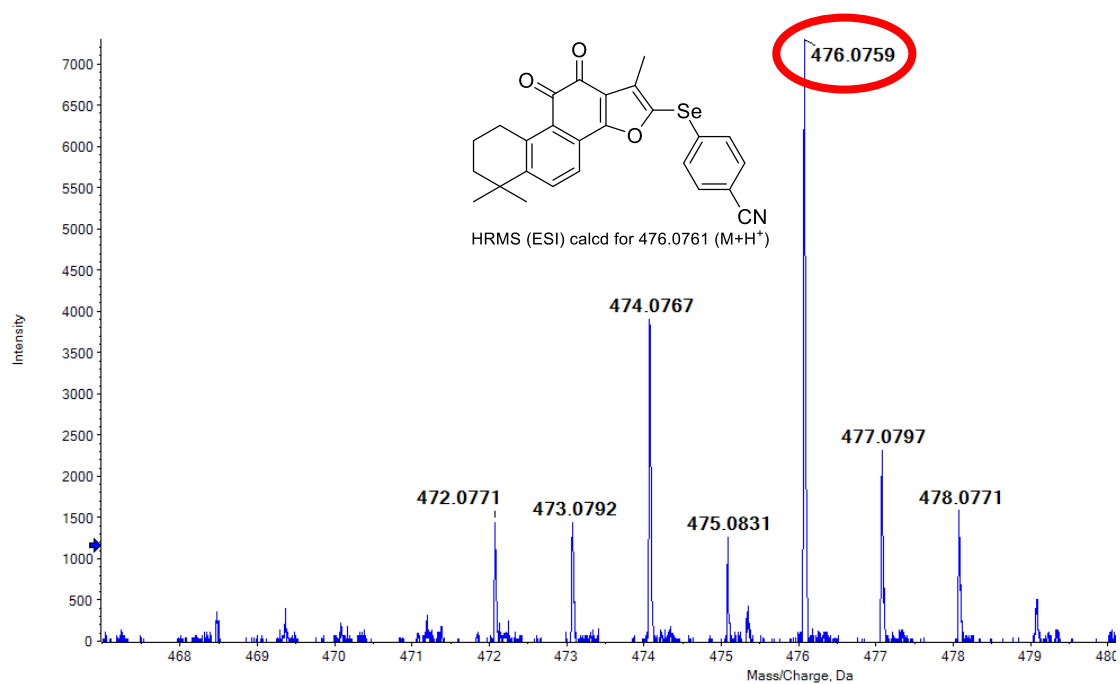

$^1\text{H}$  NMR (400 MHz,  $\text{CDCl}_3$ ) of compound **2t**

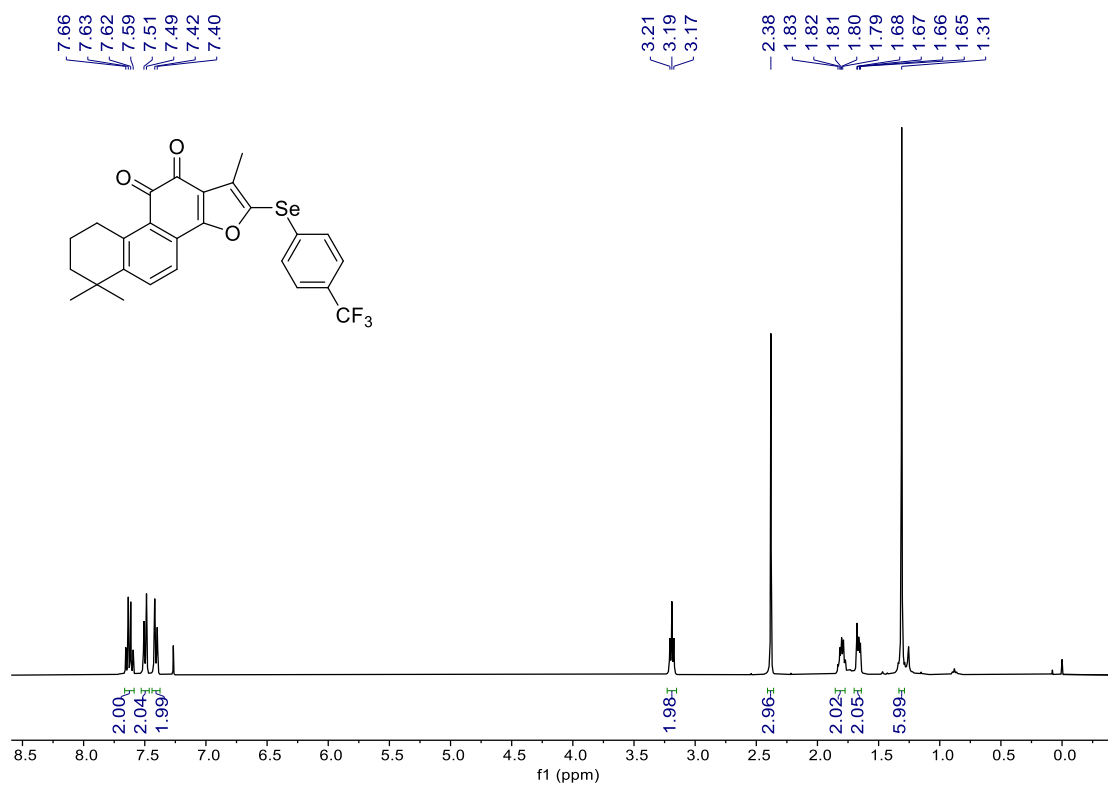

$^{13}\text{C}$  NMR (101 MHz,  $\text{CDCl}_3$ ) of compound **2t**

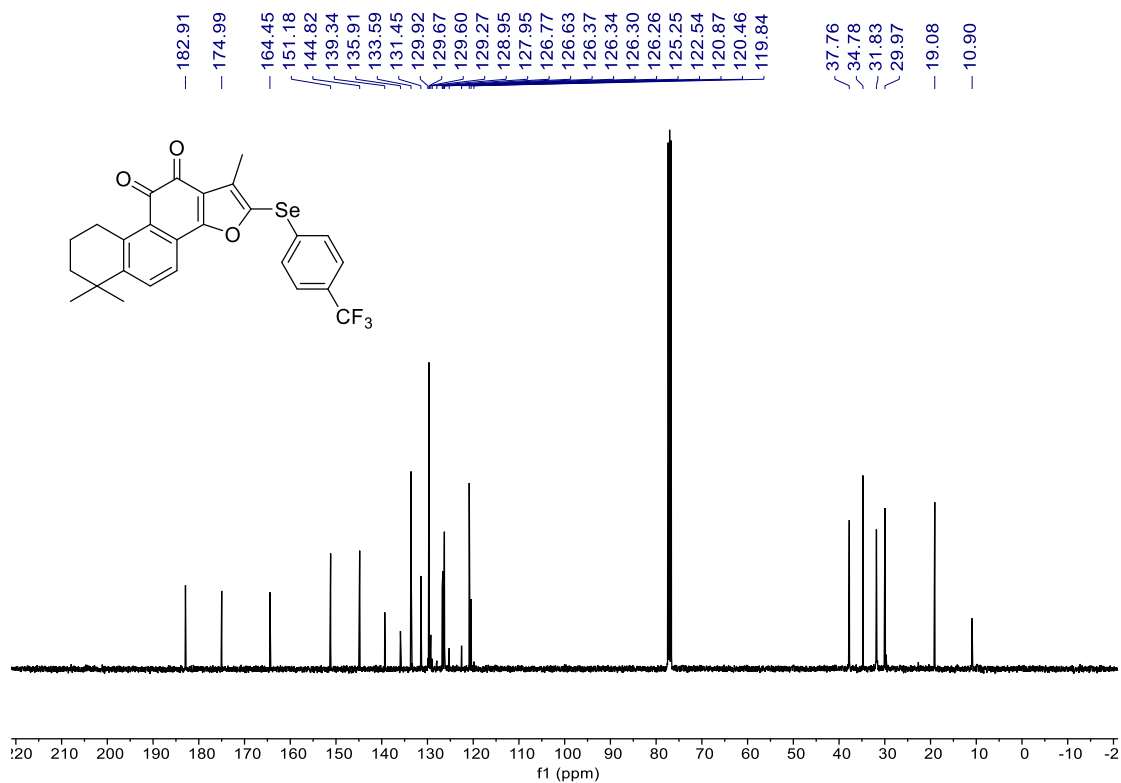

$^{19}\text{F}$  NMR (376 MHz,  $\text{CDCl}_3$ ) of compound **2t**

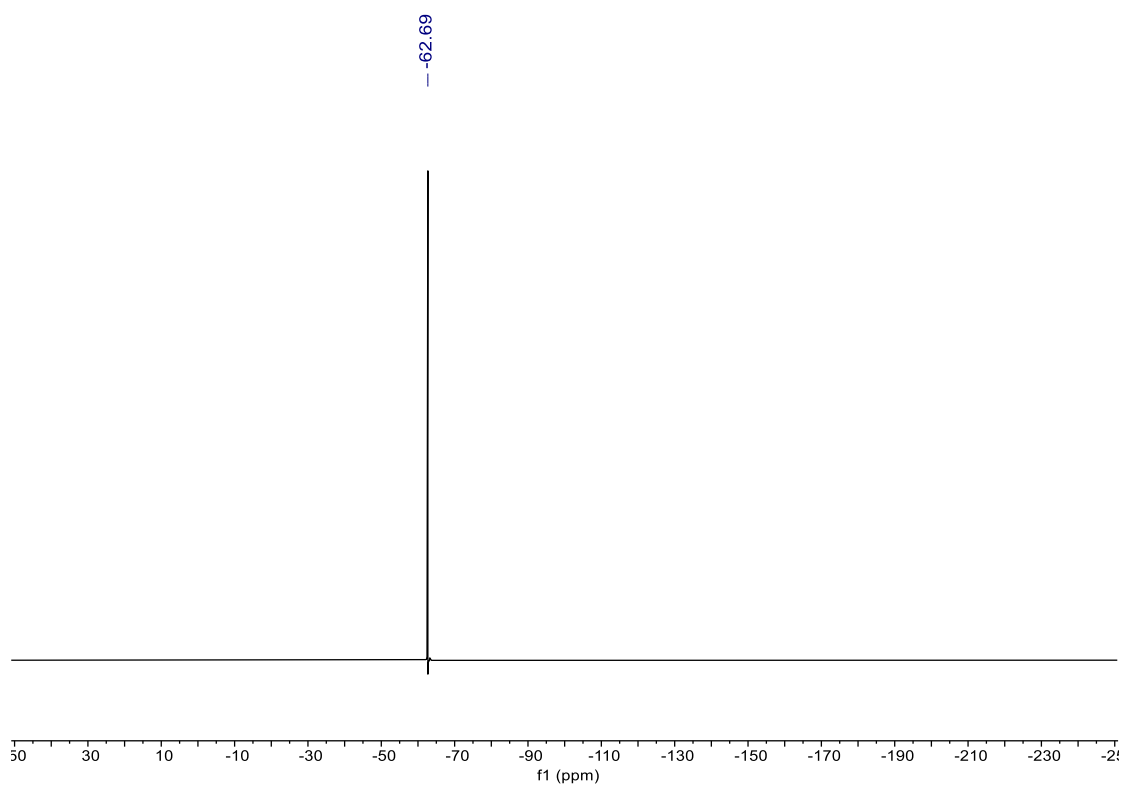

HRMS(ESI) of compound **2t**

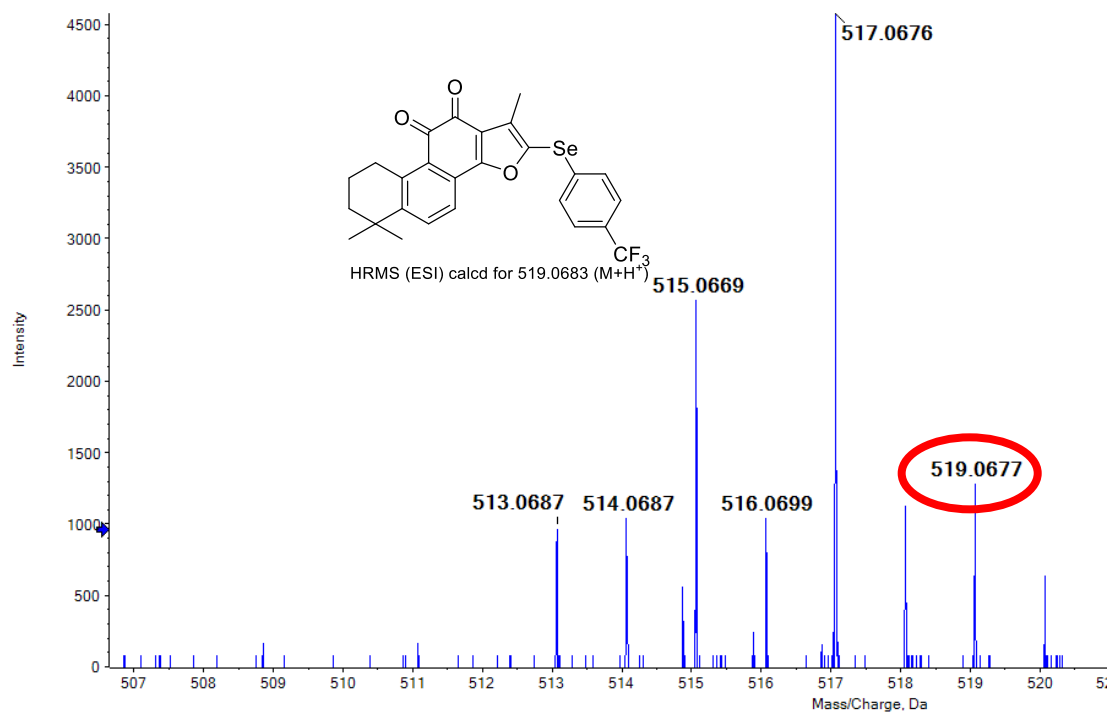

$^1\text{H}$  NMR (400 MHz,  $\text{CDCl}_3$ ) of compound **2u**

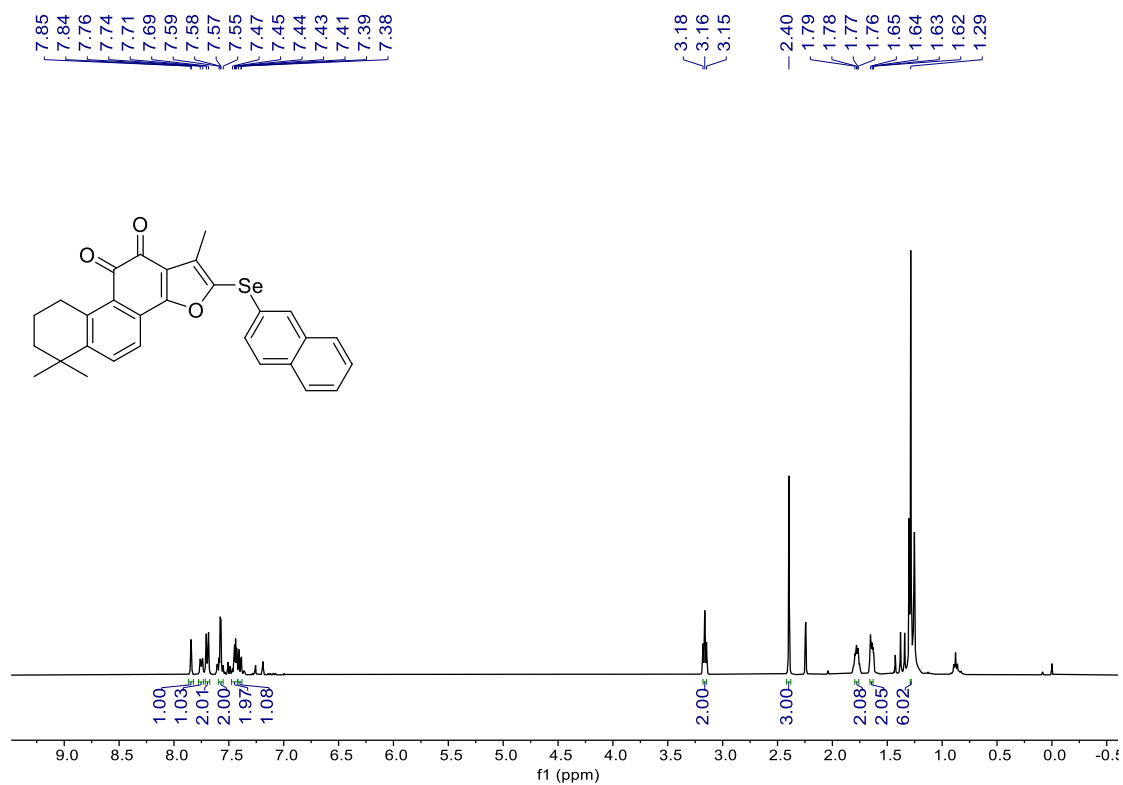

$^{13}\text{C}$  NMR (101 MHz,  $\text{CDCl}_3$ ) of compound **2u**

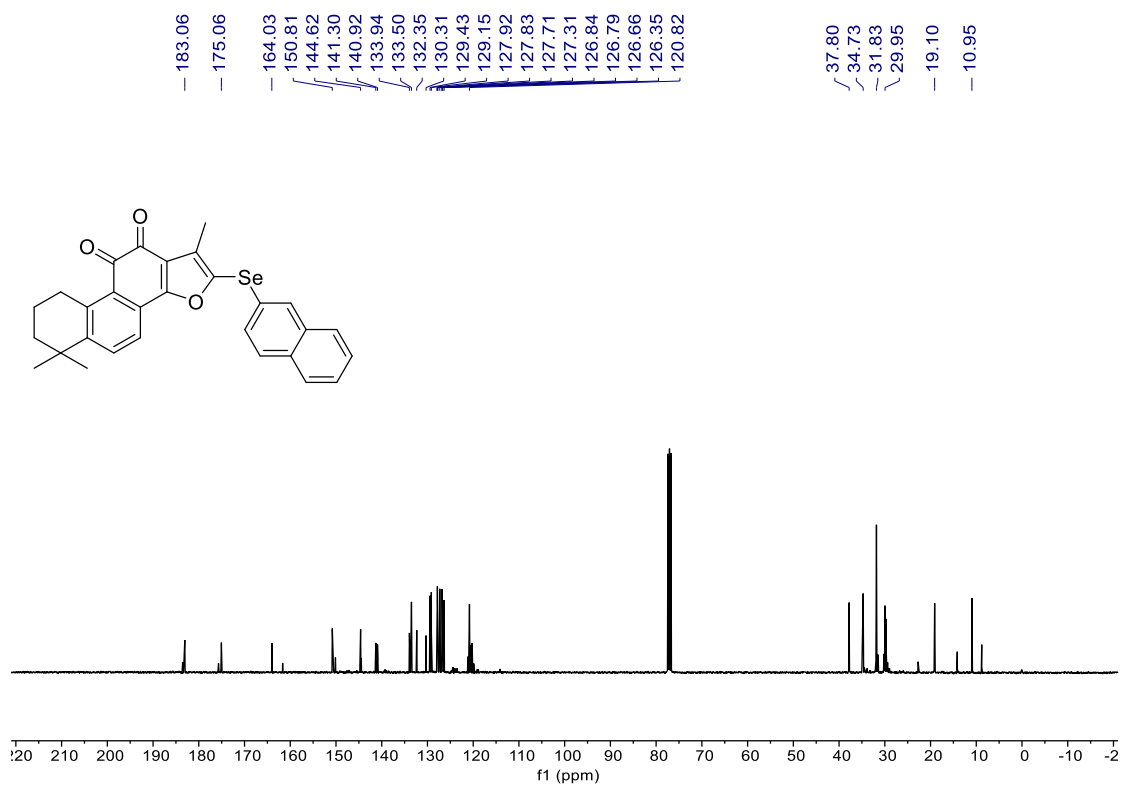

HRMS(ESI) of compound **2u**

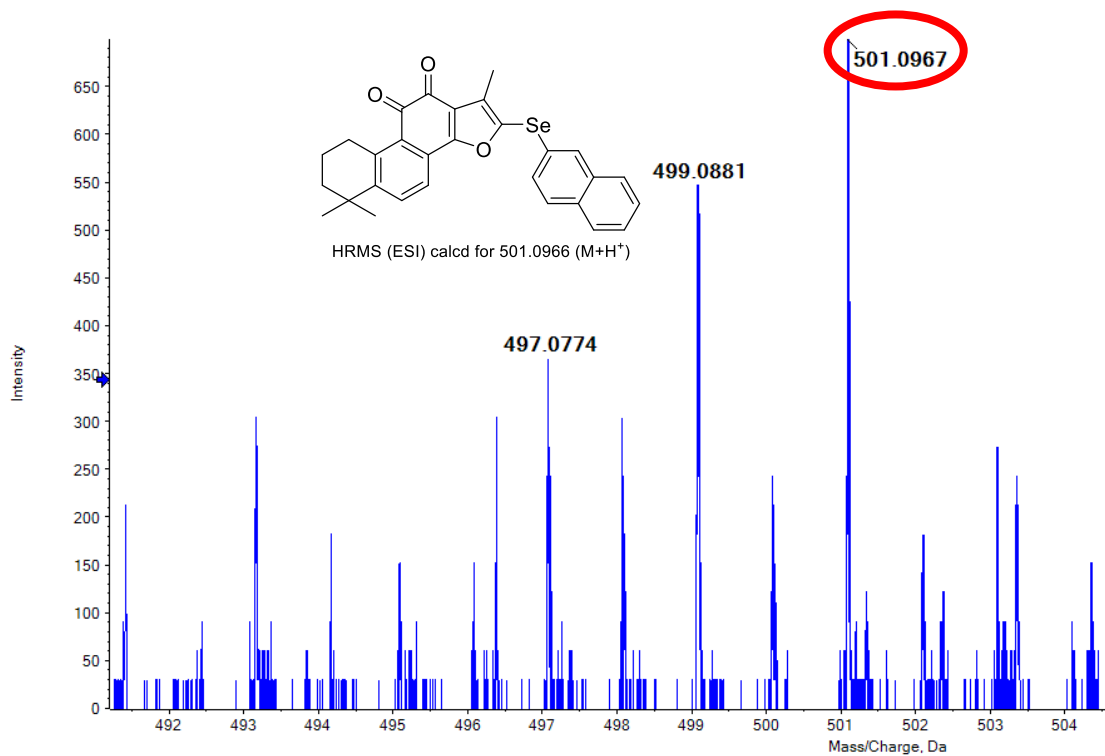

$^1\text{H}$  NMR (400 MHz,  $\text{CDCl}_3$ ) of compound **2v**

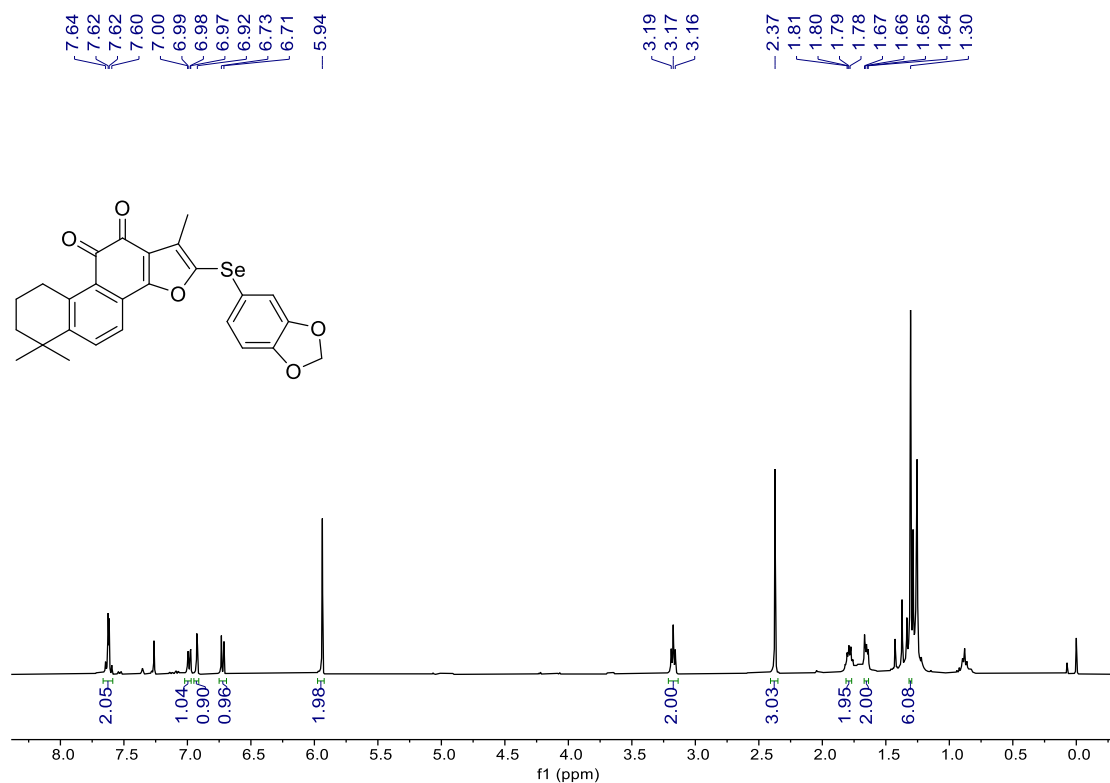

$^{13}\text{C}$  NMR (101 MHz,  $\text{CDCl}_3$ ) of compound **2v**

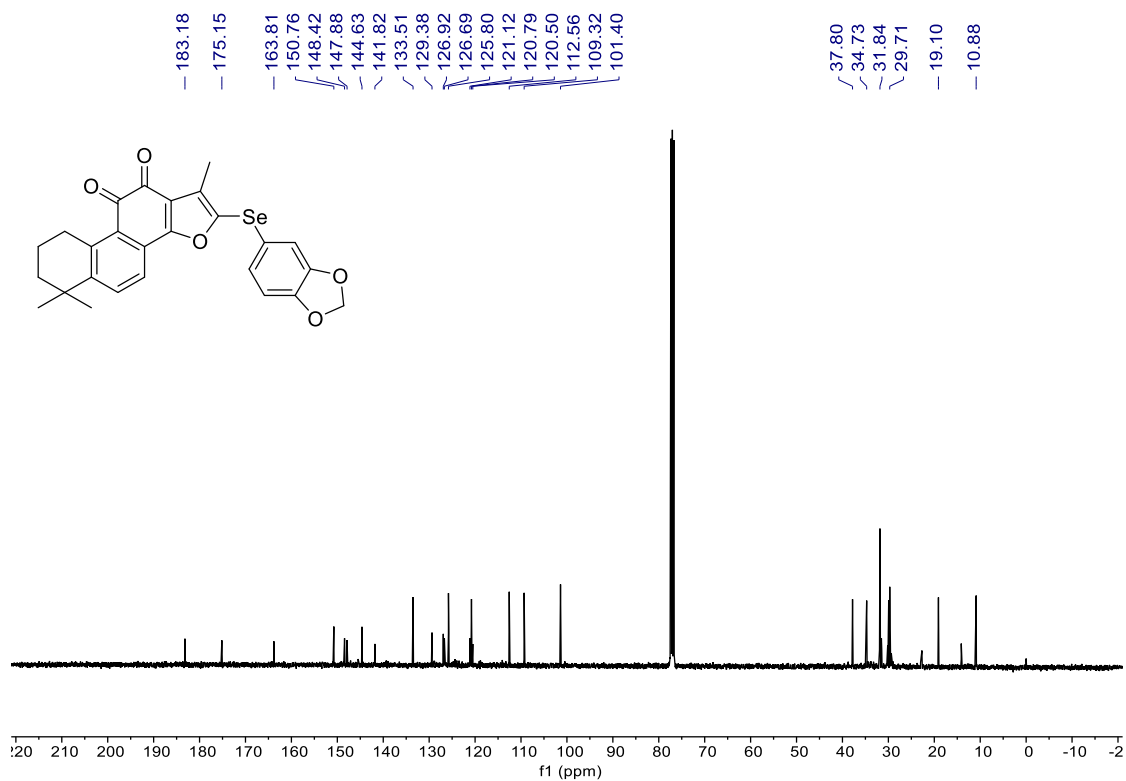

HRMS(ESI) of compound **2v**

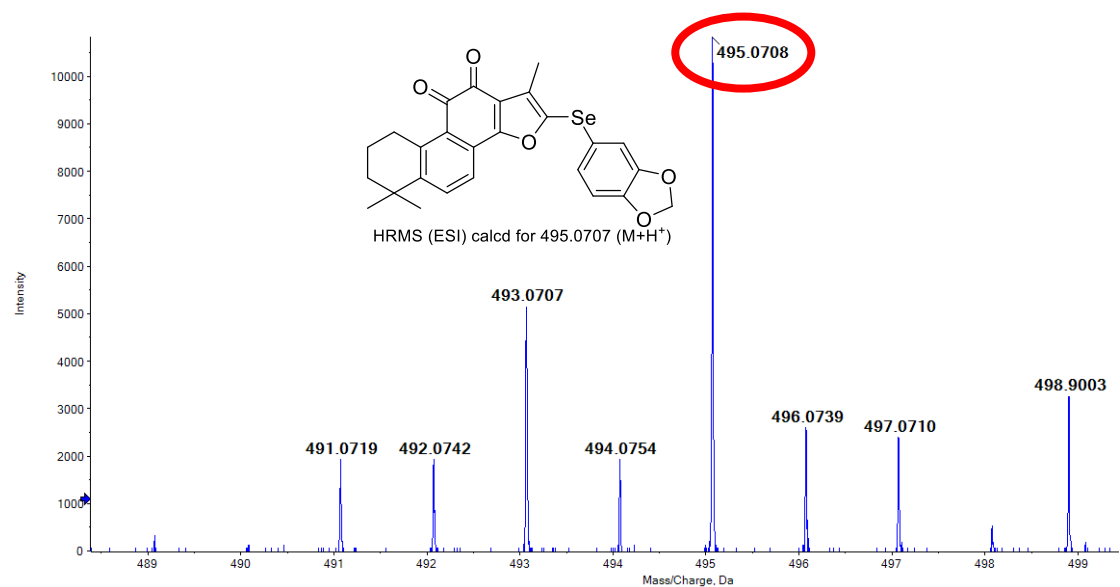

$^1\text{H}$  NMR (400 MHz,  $\text{CDCl}_3$ ) of compound **2w**

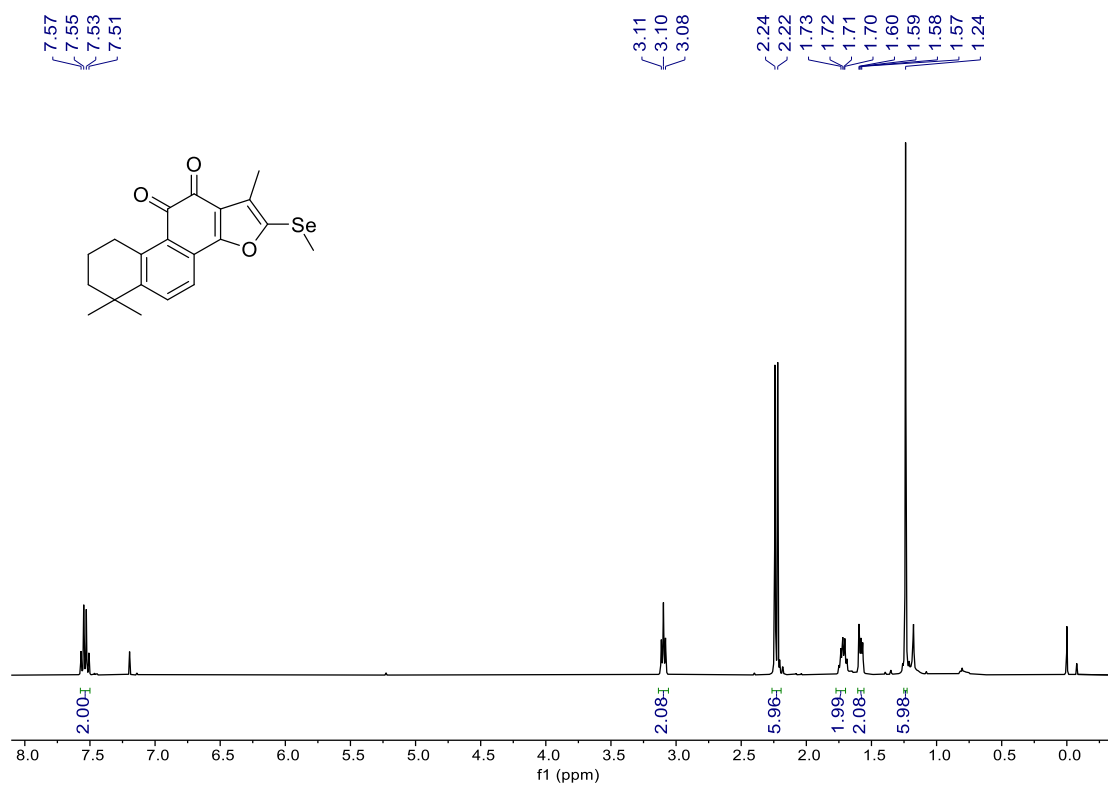

$^{13}\text{C}$  NMR (101 MHz,  $\text{CDCl}_3$ ) of compound **2w**

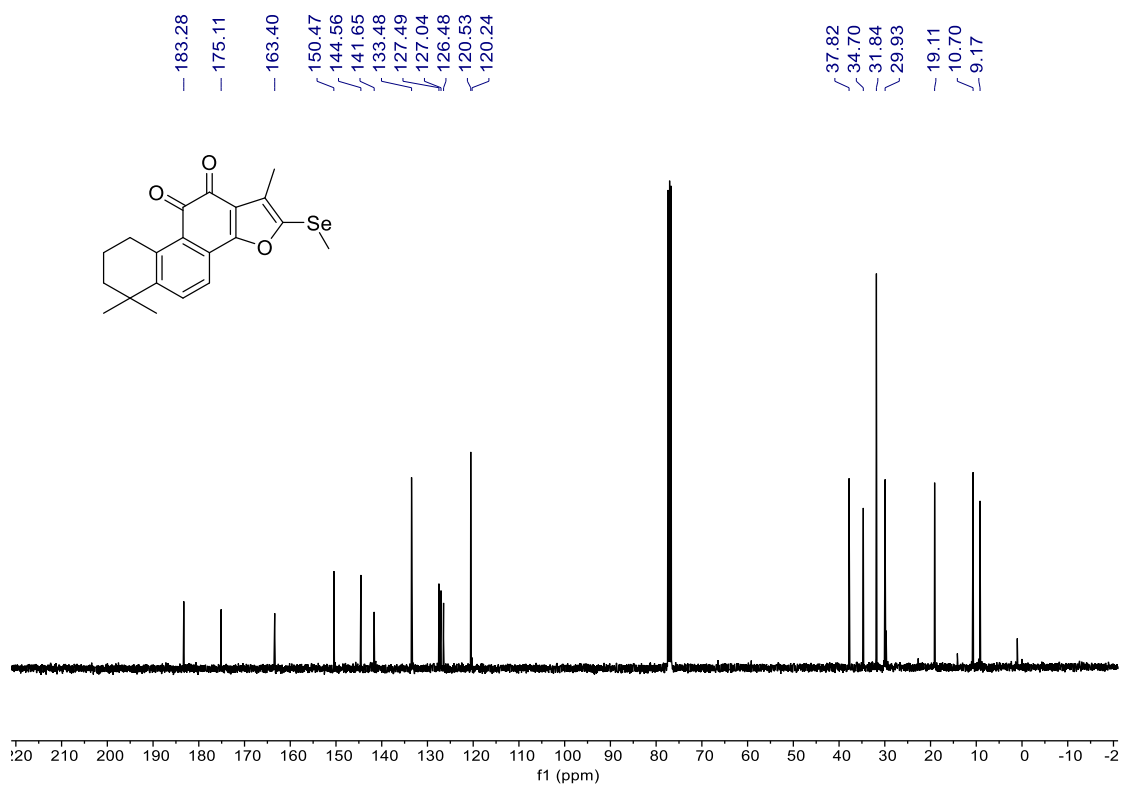



HRMS(ESI) of compound **2w**

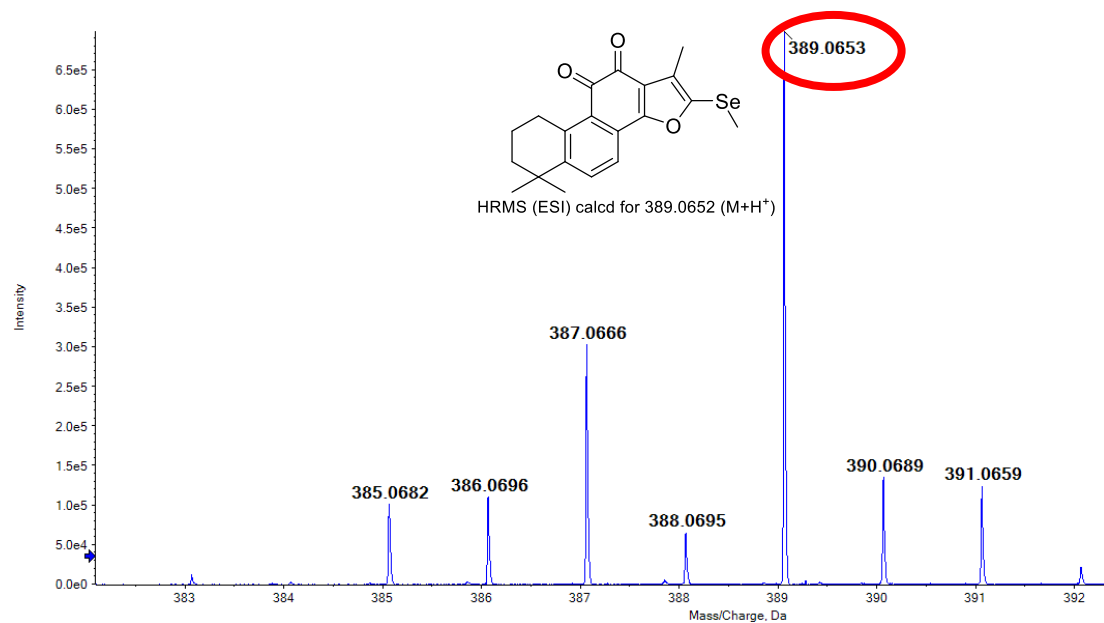

$^1\text{H}$  NMR (400 MHz,  $\text{CDCl}_3$ ) of compound **2x**

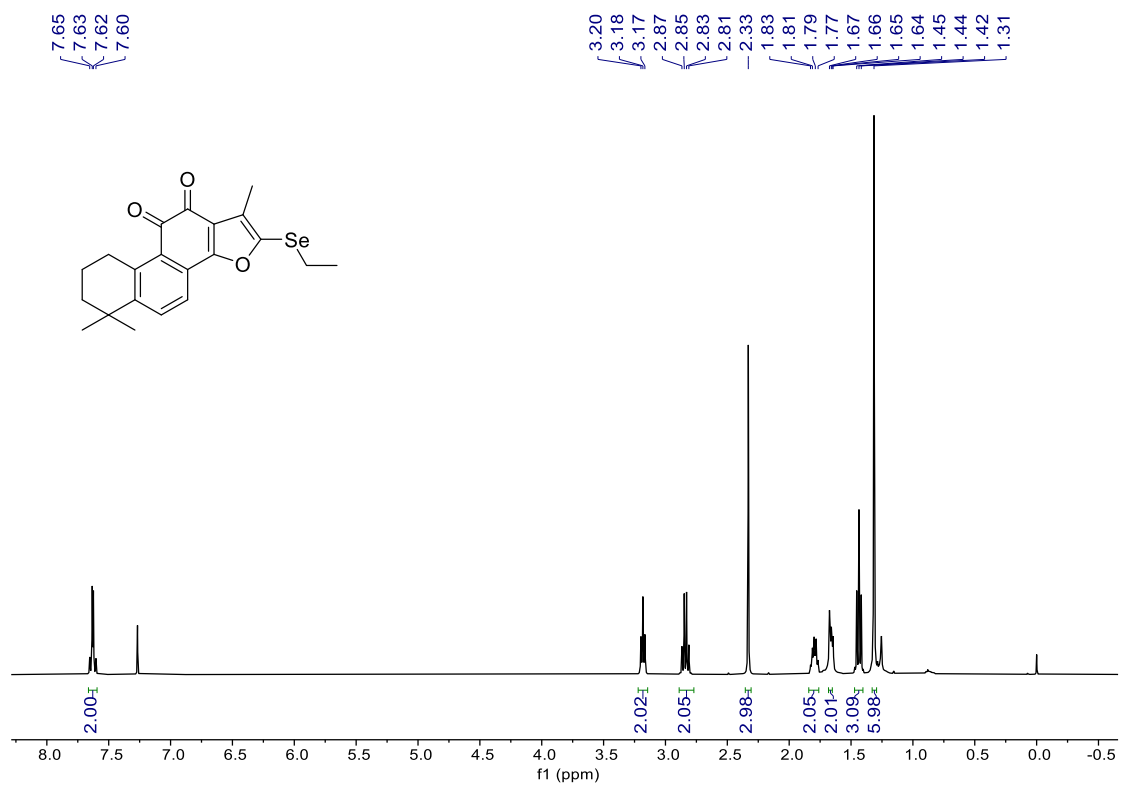

$^{13}\text{C}$  NMR (101 MHz,  $\text{CDCl}_3$ ) of compound **2x**

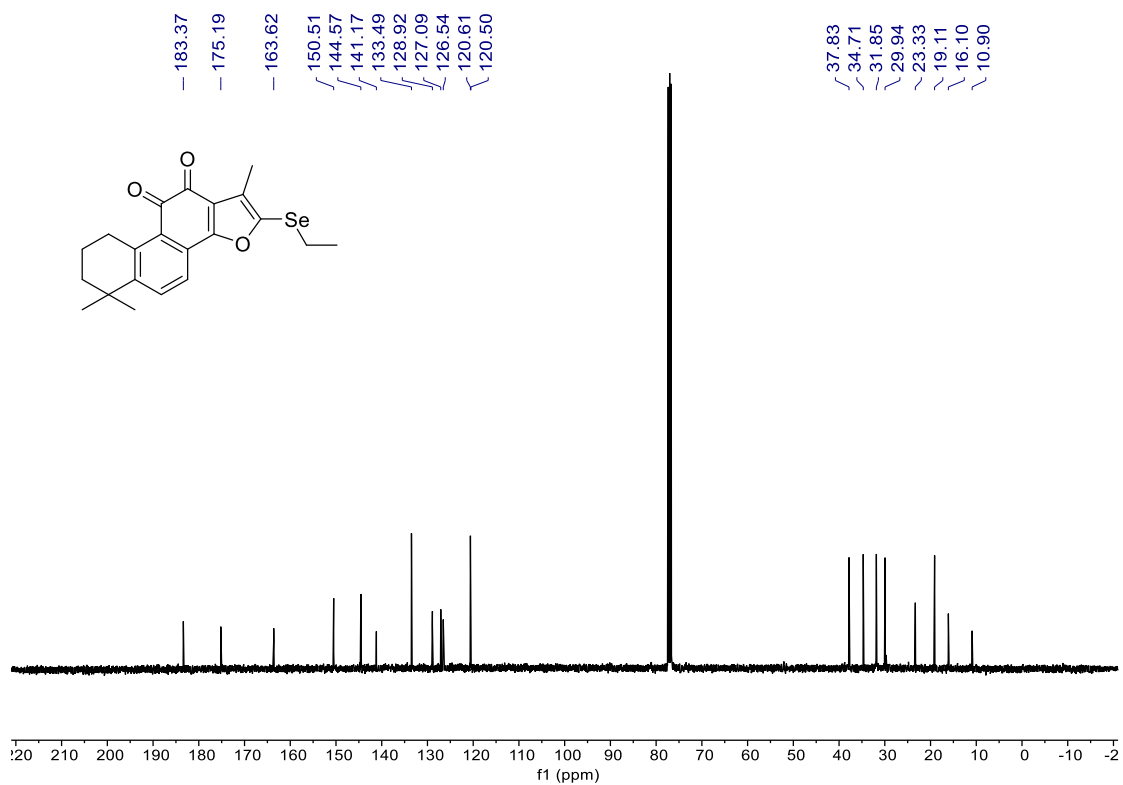

HRMS(ESI) of compound **2x**

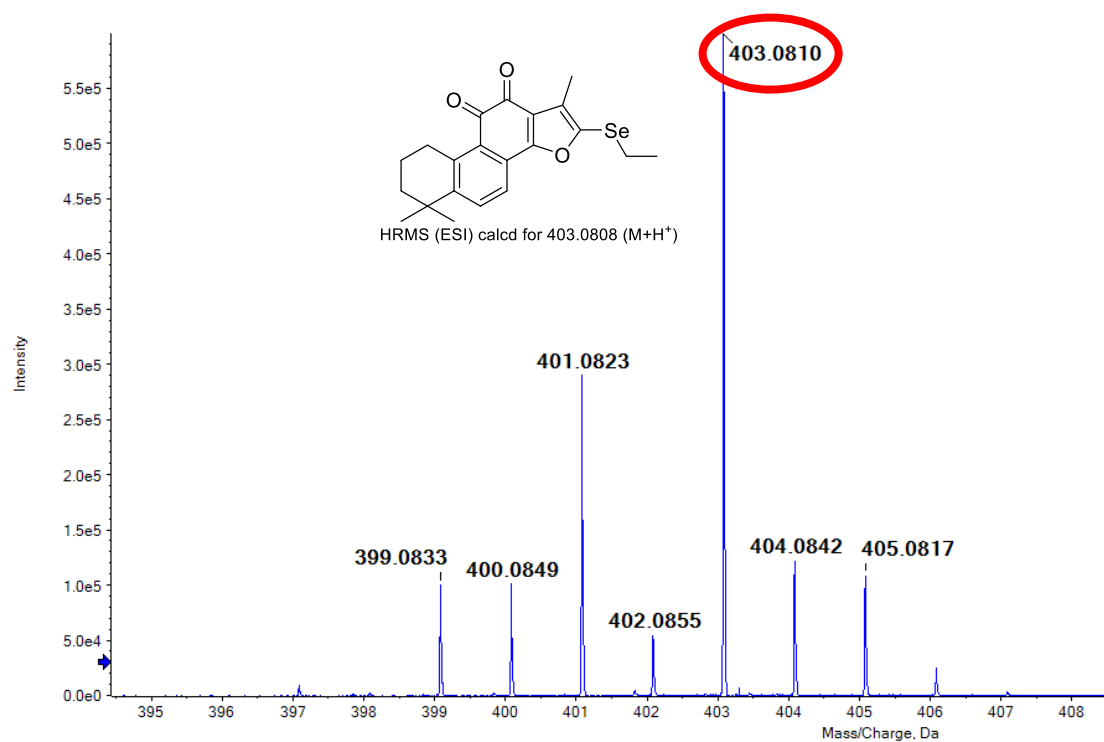

$^1\text{H}$  NMR (400 MHz,  $\text{CDCl}_3$ ) of compound **2y**

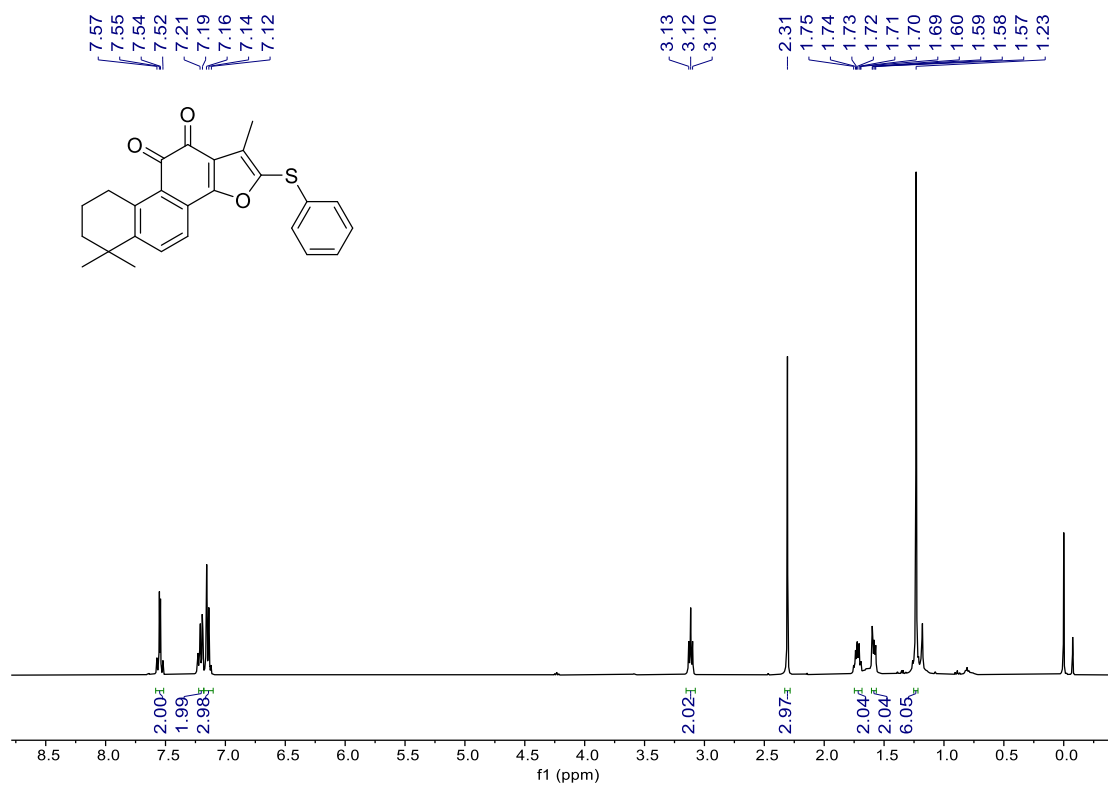

$^{13}\text{C}$  NMR (101 MHz,  $\text{CDCl}_3$ ) of compound **2y**

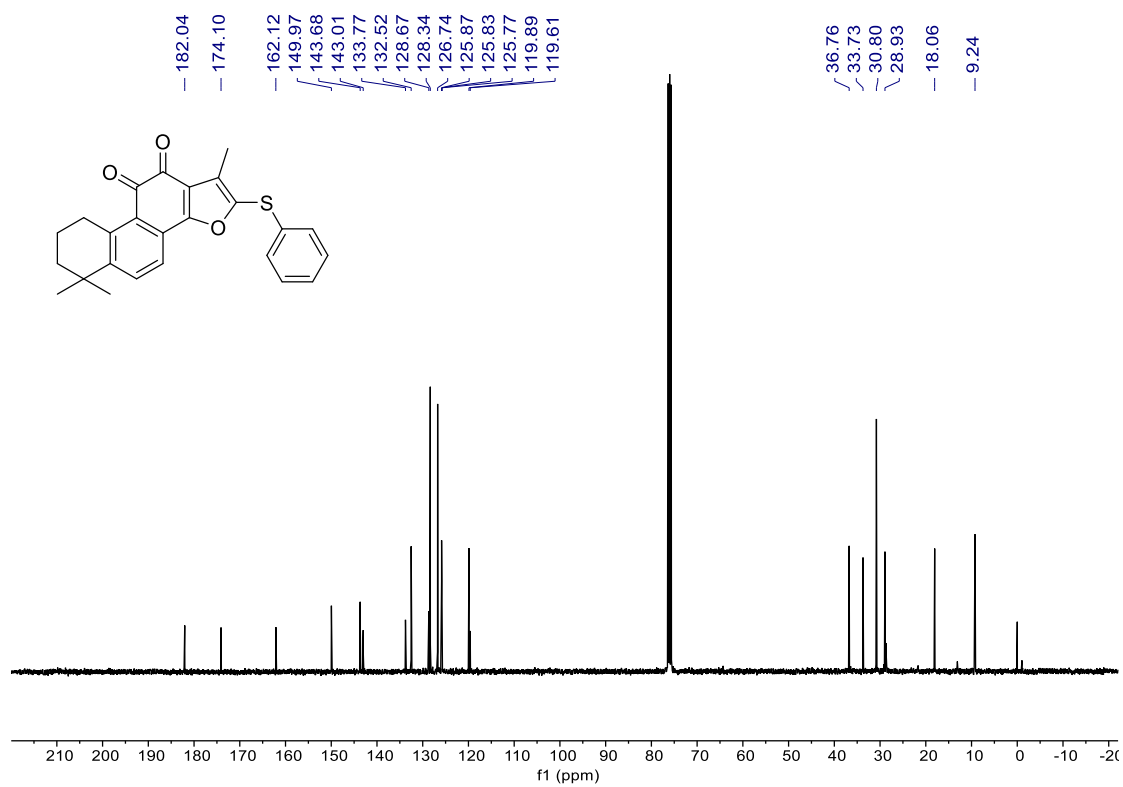

HRMS(ESI) of compound **2y**

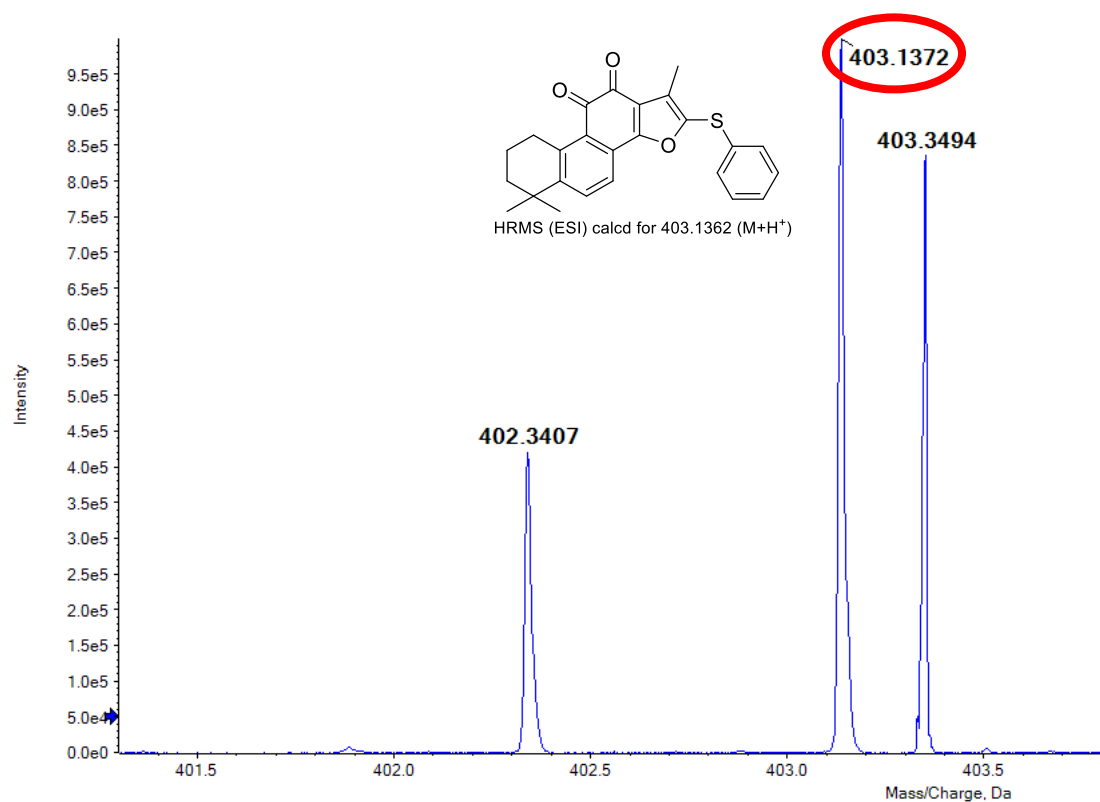

$^1\text{H}$  NMR (400 MHz,  $\text{CDCl}_3$ ) of compound **2z**

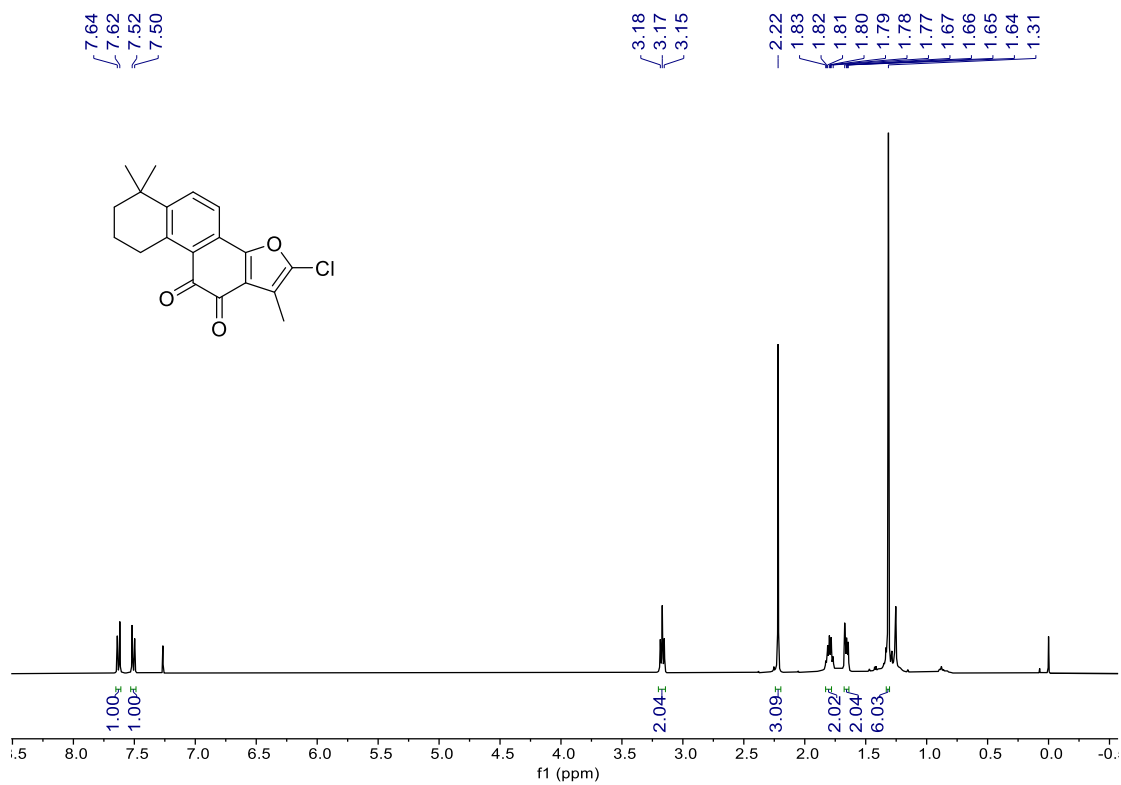

$^{13}\text{C}$  NMR (101 MHz,  $\text{CDCl}_3$ ) of compound **2z**

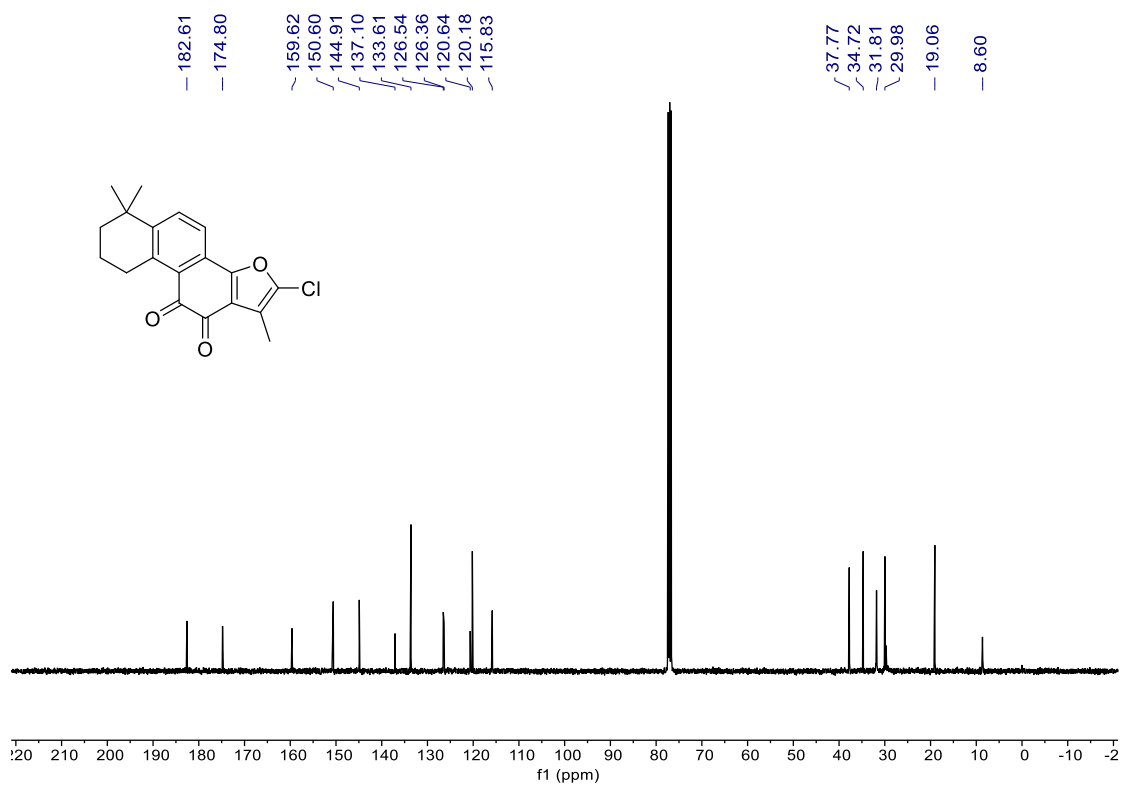

HRMS(ESI) of compound **2z**

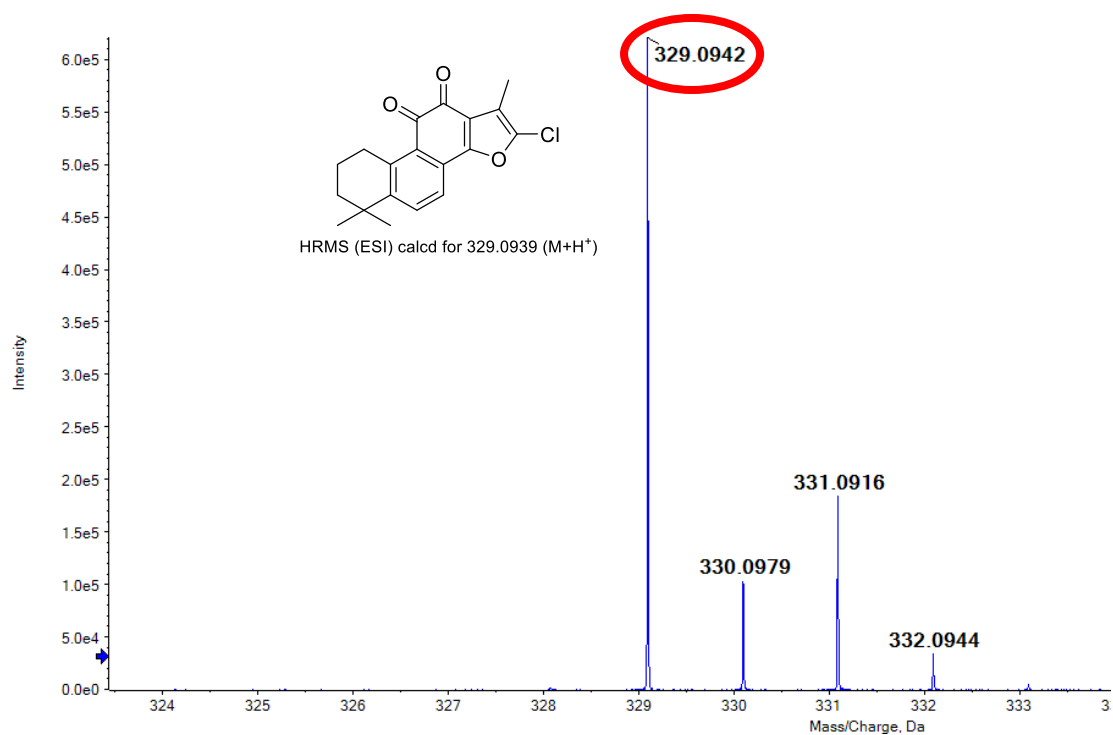

$^1\text{H}$  NMR (400 MHz,  $\text{CDCl}_3$ ) of compound **2za**

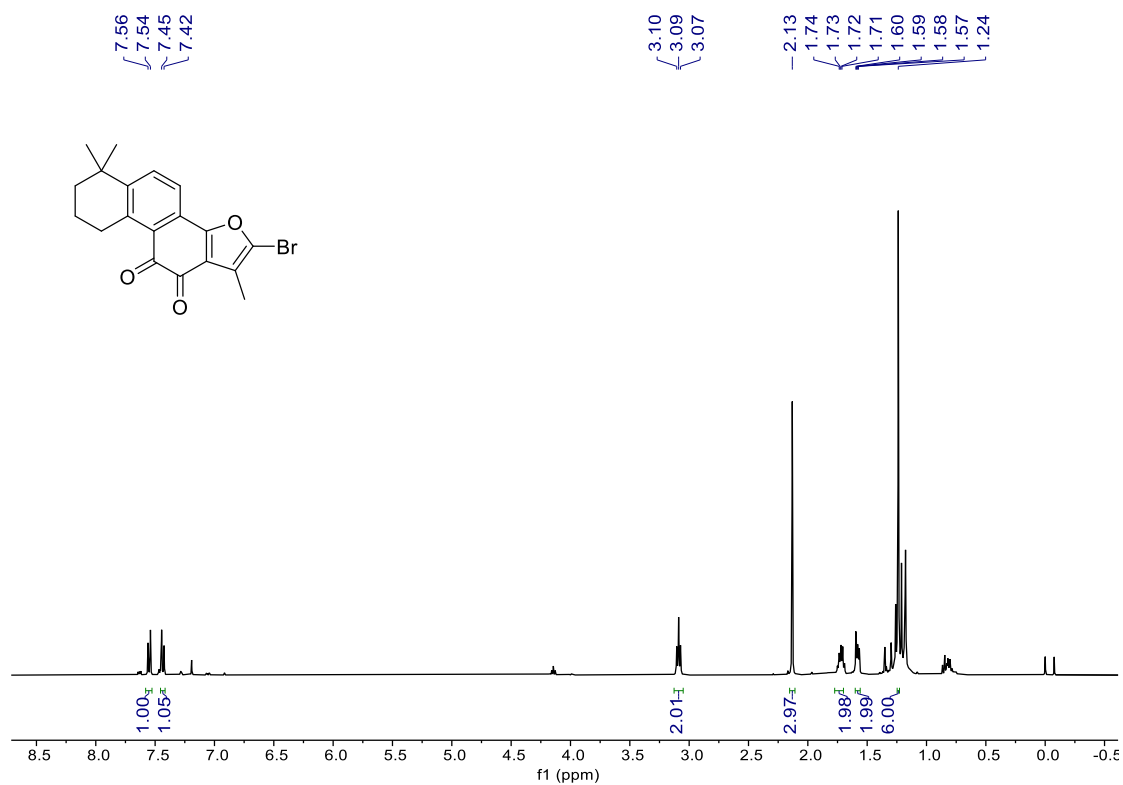

$^{13}\text{C}$  NMR (101 MHz,  $\text{CDCl}_3$ ) of compound **2za**

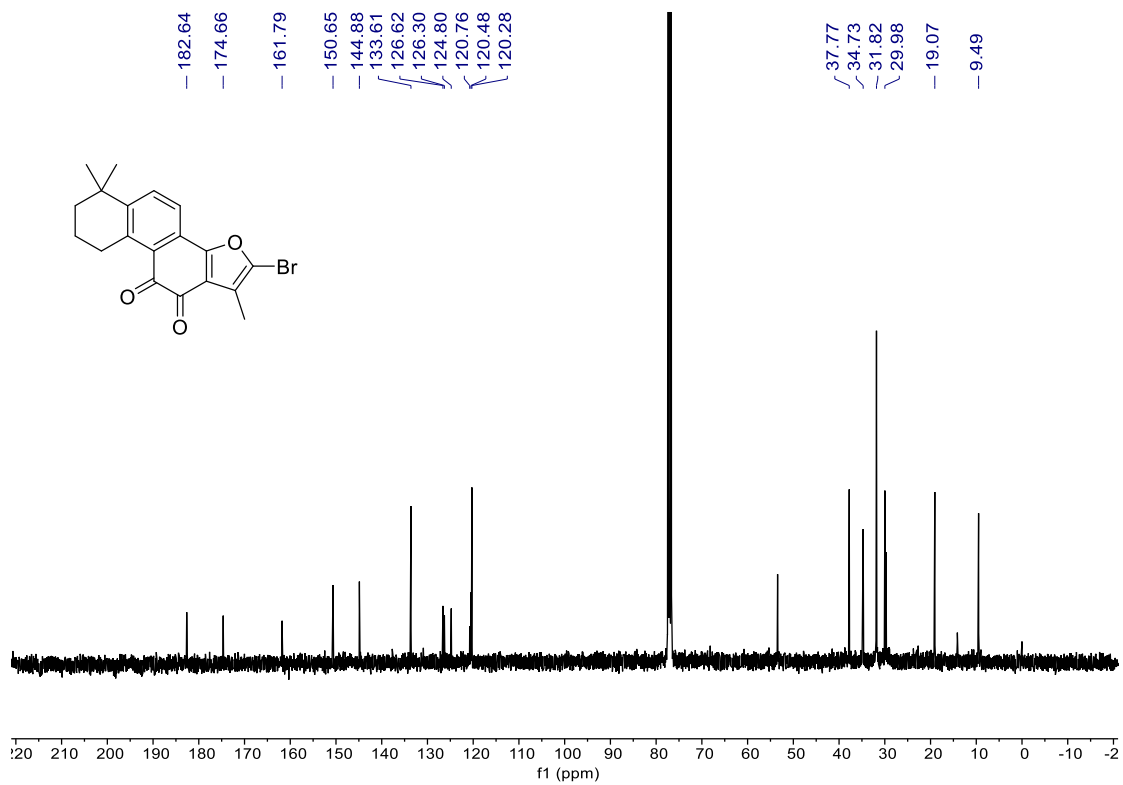

HRMS(ESI) of compound **2za**

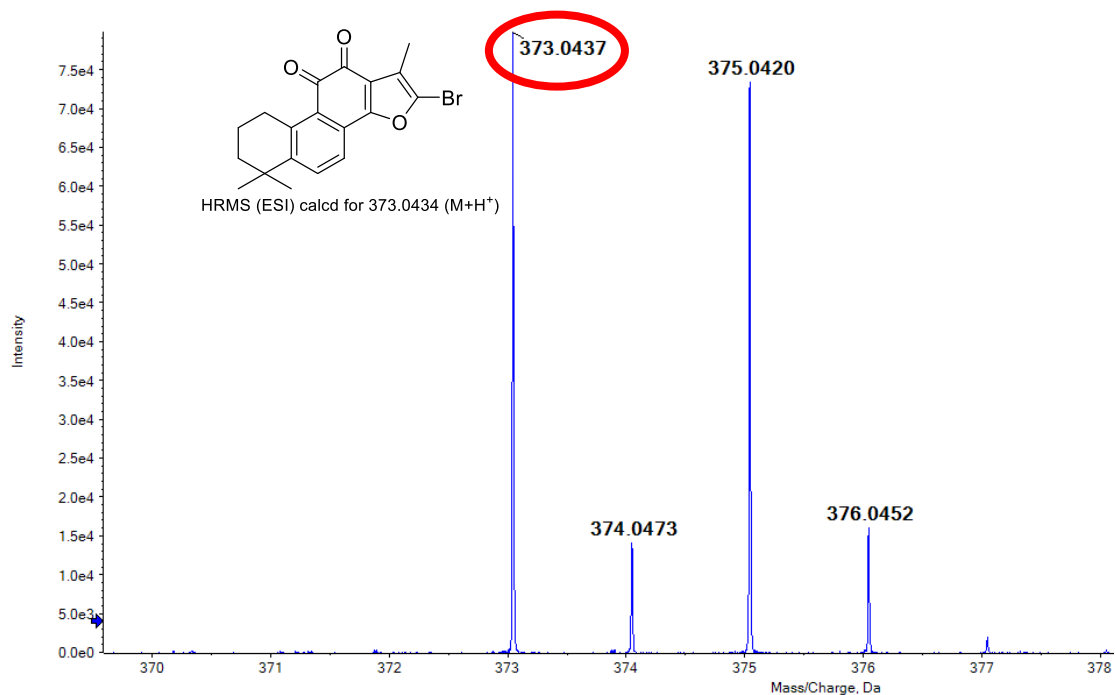

$^1\text{H}$  NMR (400 MHz,  $\text{CDCl}_3$ ) of compound **3a**

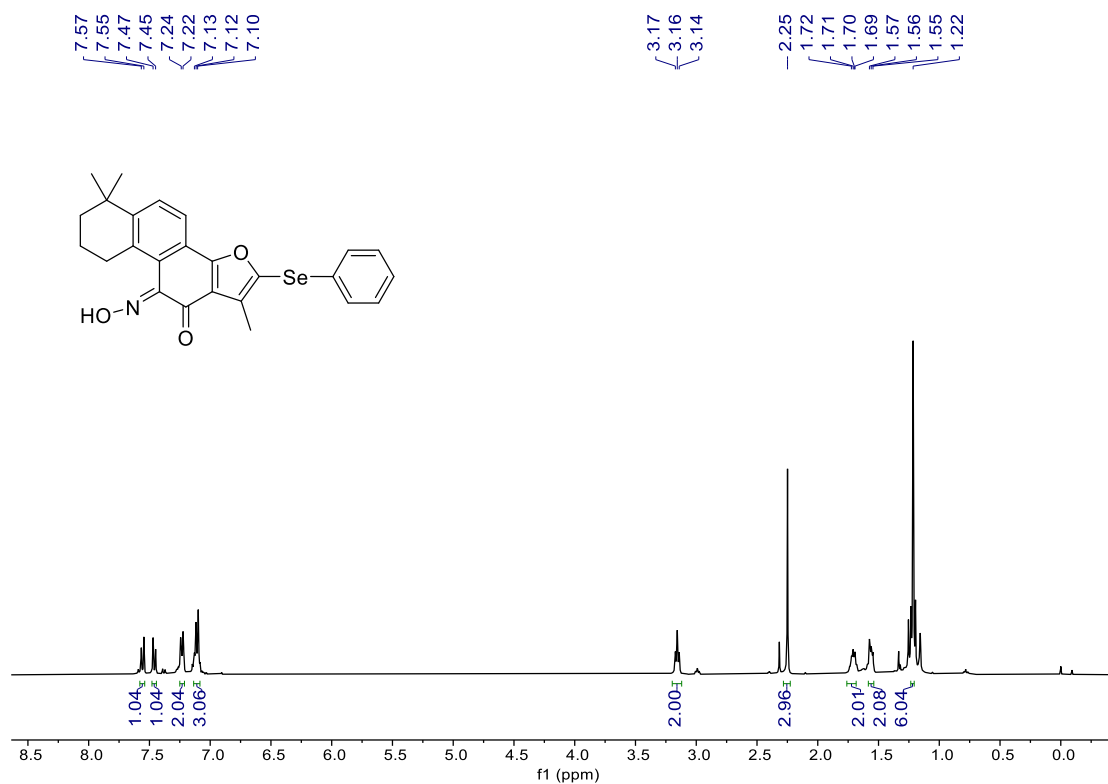

$^{13}\text{C}$  NMR (101 MHz,  $\text{CDCl}_3$ ) of compound **3a**

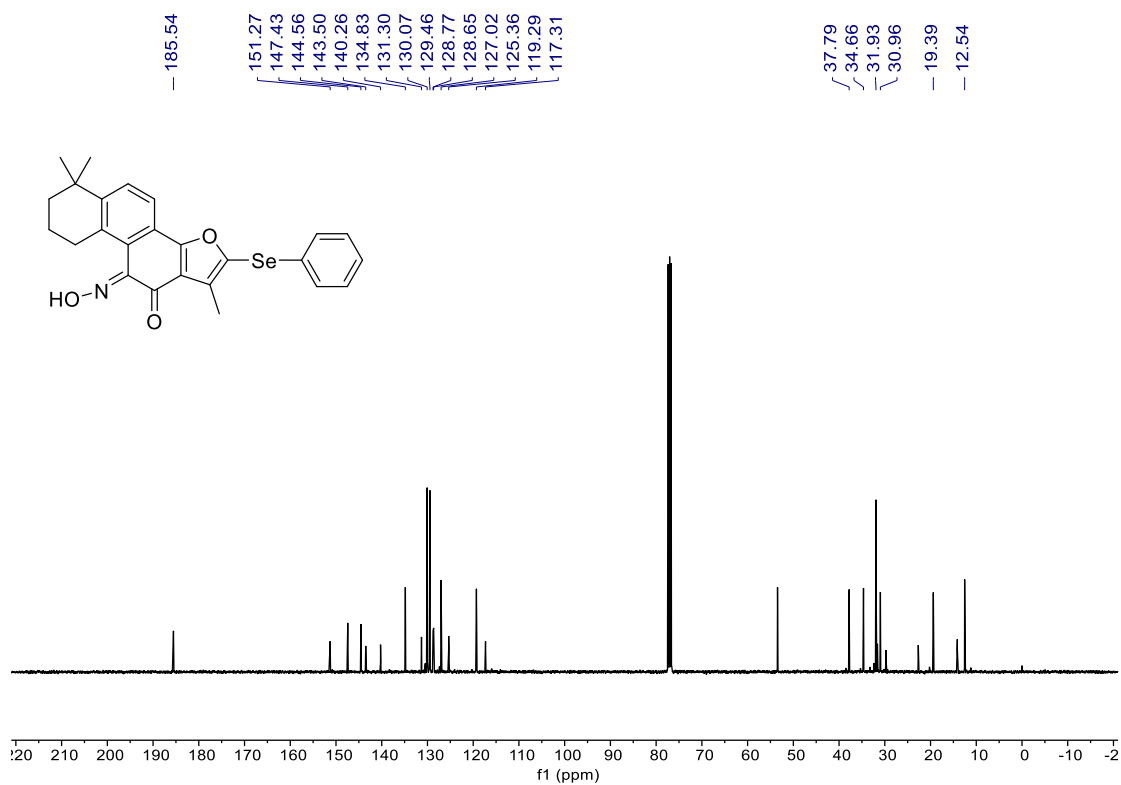

HRMS(ESI) of compound **3a**

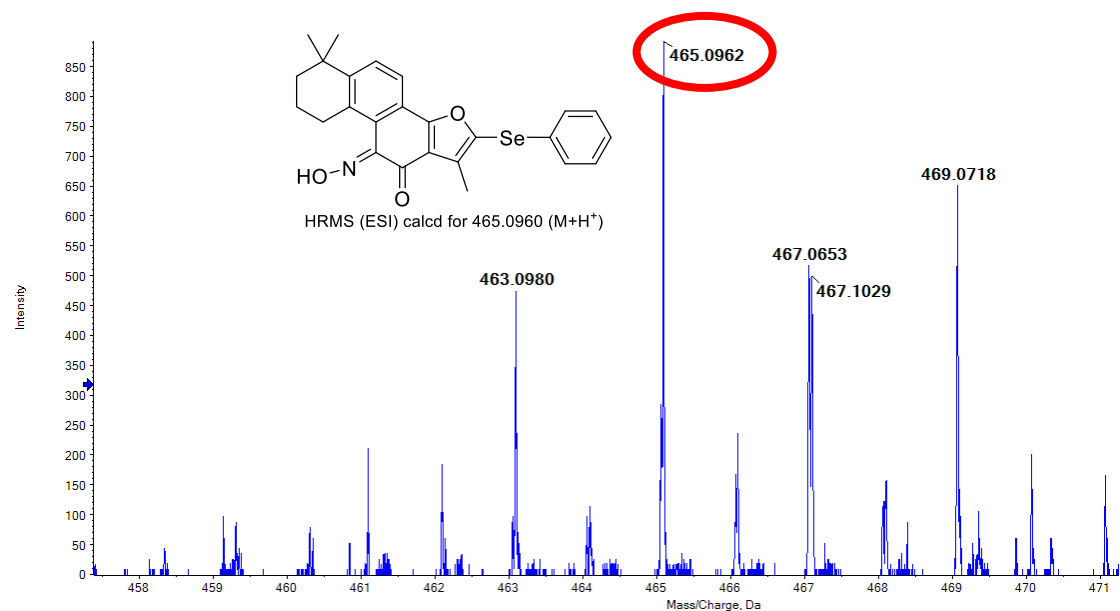

Supplement: d4ob01479k1.pdf [file d4ob01479k1.pdf]
